# Supplementary material for: A pilot investigation of differential hydroxymethylation levels in patient-derived neural stem cells implicates altered cortical development in bipolar disorder
Source: Front Psychiatry. 2023 Apr 17;14:1077415. doi: 10.3389/fpsyt.2023.1077415 (PMC10150707; doi:10.3389/fpsyt.2023.1077415)
Supplement: Supplementary file 4 [file Table_1.xlsx]

## Sheet: Supplementary Table 1
Supplementary Table 1. Antibodies used for immunofluorescence staining of iPSCs and NSCs.
Name	Species Reactivity	Clonality	Isotype	Dilution	Supplier	Catalog
Primary Antibodies
OCT4	Human/Mouse	Monoclonal	IgG	1-200	ThermoFisher Scientific	701756
Sox2	Human/Mouse/Rat	Polyclonal	IgG	1-500	Abcam	ab97959
Nanog	Human	Monoclonal	IgG1	1-200	TherFisher Scientific	MA1-017
Nestin	Human/Mouse	Monoclonal	IgG1	1-200	TherFisher Scientific	MA1-110
SSEA-4	Human/Mouse/Rabbit	Monoclonal	IgG3	1-200	TherFisher Scientific	41-4000
Secondray Antibodies
Goat anti-mouse	Mouse	Polyclonal	IgG	1-100	ThermoFisher Scientific	62-6511
Goat Aanti-Rabbit	Rabbit	polyclonal	IgG	1-100	ThermoFisher Scientific	A27039
Goat anti-mouse	Mouse	polyclonal	IgG	1-100	ThermoFisher Scientific	A28180

## Sheet: Supplementary Table 2
Supplementary Table 2. Location of detected 5hmC sites according to genomic feature and CpG island proximity.
Genomic Feature	Number of 5hmC Sites	Percent
Promoter	174405	8.80868
5' UTR	51158	2.58384
3' UTR	62186	3.14083
Exon	179039	9.04273
Intron	895522	45.2301
Intergenic	617613	31.1938
Total	1979923	100
CpG Island(CGI)	295004	14.8998
CpG Shore (2kb from CGI)	268582	13.5653
CpG Shelf (2-4kb from CGI)	121786	6.15105
Open Sea	1294551	65.3839
Total	1979923	100

## Sheet: Supplementary Table 3
Supplementary Table 3. Mean 5hmC levels according to genomic feature and CpG island proximity.
Genomic Feature	Number of 5hmC Counts for iPSCs (percent); n=4	Mean 5hmC Count per Site for iPSCs	SEM	Number of 5hmC Counts for NSCs (percent); n=4	Mean 5hmC Count per Site for NSCs	SEM	Total Number of 5hmC Counts for All Cell Lines (percent); n=8	Mean 5hmC Count per Site for All Cell Lines	SEM	Paired t-Test P-Value (iPSC vs. NSC)
Promoter	1686114 (7.72%)	9.66781	0.0520193	1709292 (7.92%)	9.80071	0.0498645	3395406 (7.82%)	19.4685	0.0995116	1.44242e-09
5' UTR	393874 (1.80%)	7.69917	0.0880164	426911 (1.98%)	8.34495	0.0865804	820785 (1.89%)	16.0441	0.170643	4.19901e-68
3' UTR	824241 (3.78%)	13.2545	0.0945585	797889 (3.70%)	12.8307	0.0981359	1622130 (3.74%)	26.0851	0.187724	2.75438e-22
Exon	2208777 (10.12%)	12.3368	0.0553714	2116870 (9.81%)	11.8235	0.0515253	4325647 (9.96%)	24.1604	0.103935	1.49575e-91
Intron	9785864 (44.82)	10.9276	0.0238898	9743812 (45.15%)	10.8806	0.0238556	19529676 (44.98%)	21.8082	0.046543	1.03354e-05
Intergenic	6934869 (31.76%)	11.2345	0.0298195	6787442 (31.45%)	10.9957	0.029346	13722311 (31.61%)	22.2302	0.0576351	2.90074e-71
Total	21833739 (100%)			21582216 (100%)			43415955 (100%)
CpG Island (CGI)	2181540 (9.99%)	7.39495	0.0298453	2311727 (10.71%)	7.83626	0.0279127	4493267 (10.35%)	15.2312	0.0558824	5.33406e-197
CpG Shore (2kb from CGI)	4511509 (20.66%)	16.7975	0.055249	4138643 (19.18%)	15.4092	0.0520413	8650152 (19.92%)	32.2067	0.104634	0
CpG Shelf (2-4kb from CGI)	1639339 (7.51%)	13.4608	0.0717911	1579090 (7.32%)	12.9661	0.0702833	3218429 (7.41%)	26.4269	0.138426	8.81181e-54
Open Sea	13501351 (61.84%)	10.432	0.0196688	13552756 (62.80%)	10.4718	0.0197744	27054107 (62.31%)	20.9038	0.0384523	6.164e-06
Total	21833739 (100%)			21582216 (100%)			43415955 (100%)

## Sheet: Supplementary Table 4
Supplementary Table 4. Nominally significant (P<0.05) associations identified by paired t-test between iPSC and NSC cell lines for log2 (CPM) 5hmC.
Chromosome	5hmC Site Position (bp; hg38)	T-Statistic (iPSC vs. NSC)	P-Value	FDR ("BH")	log2FC	Gene	Strand Orientation	Exon	5'UTR	3'UTR	CpG Island	CpG Shore	CpG Shelf	Promoter	Promoter_Gene
chr8	139706584	63.0674	8.7834e-06	0.513987	-1.89121							CpG_Shore_2kb_Downstream
chr2	8116853	52.9845	1.4807e-05	0.513987	-0.596226	LINC00298	-
chr6	26104997	52.1712	1.55097e-05	0.513987	-0.807871							CpG_Shore_2kb_Downstream
chr11	118534285	51.1059	1.6499e-05	0.513987	-0.879543	TMEM25	+	exon					CpG_Shelf_2-4kb_Downstream
chr4	182825846	41.153	3.1575e-05	0.787491	-0.562753
chr16	2252003	32.4527	6.43036e-05	0.887347	-0.567956			exon	5'UTR			CpG_Shore_2kb_Downstream		promoter_-_strand	ECI1
chr1	12556926	31.0834	7.3159e-05	0.887347	-0.416419
chr7	67084	29.3642	8.6737e-05	0.887347	-0.364756
chr12	113820460	29.1612	8.85565e-05	0.887347	-1.07654	RBM19	-
chr14	33938762	27.1182	0.000110044	0.887347	-0.912068	EGLN3	-
chr12	124544085	26.859	0.000113249	0.887347	-1.09337							CpG_Shore_2kb_Downstream
chr1	41330956	26.4082	0.000119129	0.887347	-1.37975	ENSG00000287400	+
chr22	49851791	25.8331	0.000127234	0.887347	-1.19271	ENSG00000279494	+	exon				CpG_Shore_2kb_Upstream
chr1	44543984	23.8108	0.00016233	0.887347	-0.134145	RNF220	+
chr16	4317281	23.3546	0.000171987	0.887347	-0.748907	GLIS2	+					CpG_Shore_2kb_Downstream	CpG_Shelf_2-4kb_Downstream
chr4	9495603	21.8896	0.000208691	0.887347	-0.261906	UNC93B7	+					CpG_Shore_2kb_Upstream
chr5	6791312	21.3191	0.000225805	0.887347	-0.675789	LINC02236	+
chr17	74341830	20.8736	0.000240493	0.887347	-0.278869	KIF19	+
chr13	66994458	20.7564	0.000244566	0.887347	-0.339578	PCDH9-AS4	+
chr17	40980192	20.233	0.000263926	0.887347	-0.726641	KRT40	-
chr1	46469737	19.3521	0.00030139	0.887347	-0.417436	FAAHP1	+						CpG_Shelf_2-4kb_Downstream
chr16	85223883	19.2947	0.000304069	0.887347	-0.569161
chr2	190699244	19.2066	0.000308245	0.887347	-0.661786	ENSG00000228509	-
chr13	40087520	19.0297	0.000316863	0.887347	-0.3659	LINC00598	-
chr9	99368371	18.9462	0.000321043	0.887347	-0.664704	NAMA	-							promoter_+_strand	ENSG00000277465
chr1	15761100	-18.7101	0.000333271	0.887347	0.352262	FBLIM1	+					CpG_Shore_2kb_Downstream
chr4	22238283	-18.5489	0.00034197	0.887347	0.66099	ENSG00000250039	+
chr3	184231011	18.3191	0.00035491	0.887347	-1.21958	VWA5B2	+				CpG: 199
chr14	24398284	17.26	0.000423768	0.887347	-0.409434							CpG_Shore_2kb_Upstream		promoter_+_strand	NYNRIN
chr10	98308925	17.2321	0.000425813	0.887347	-0.4597
chr17	9144948	-17.001	0.000443262	0.887347	0.488124	NTN1	+
chr2	218312593	16.7499	0.000463327	0.887347	-0.44068	PNKD	+
chr14	100728989	16.6601	0.000470796	0.887347	-0.73743	DLK1	+	exon				CpG_Shore_2kb_Downstream
chr22	24603223	16.5264	0.000482219	0.887347	-0.426438	GGT1	+	exon	5'UTR
chr9	129319156	16.5084	0.000483783	0.887347	-0.373439							CpG_Shore_2kb_Upstream
chr1	27556291	16.4553	0.000488437	0.887347	-0.504515	AHDC1	-
chr2	99601511	16.3985	0.000493487	0.887347	-0.283329	AFF3	-	exon
chr22	20964709	16.2037	0.000511331	0.887347	-0.691962							CpG_Shore_2kb_Upstream		promoter_+_strand	AIFM3
chr3	126517994	16.1761	0.00051393	0.887347	-0.354702									promoter_-_strand	UROC1
chr2	184765402	16.1269	0.000518612	0.887347	-0.676706	ZNF804A	+
chr11	65378785	16.0957	0.000521604	0.887347	-0.360514	SLC25A45	-	exon
chr19	50705532	16.0536	0.000525677	0.887347	-0.63578	SHANK1	-
chr20	50931963	16.0062	0.000530315	0.887347	-1.01583	ADNP-AS1	+				CpG: 143			promoter_-_strand	ADNP
chr1	43935198	15.8958	0.000541342	0.887347	-0.732518	ARTN	+					CpG_Shore_2kb_Upstream
chr8	141507840	15.7734	0.000553921	0.887347	-0.856793	ENSG00000287325	+							promoter_-_strand	MROH5
chr12	12715745	15.7682	0.000554462	0.887347	-1.20959							CpG_Shore_2kb_Upstream
chr20	50730516	-15.1271	0.000627208	0.887347	0.63482							CpG_Shore_2kb_Upstream
chr17	36868907	14.7915	0.000670406	0.887347	-0.6646	LHX1-DT	-
chr11	122634792	14.5483	0.000704197	0.887347	-0.926328
chr22	36029337	14.0053	0.000788278	0.887347	-0.494733							CpG_Shore_2kb_Downstream
chr15	101526524	13.9113	0.000804176	0.887347	-1.17091
chr22	44286467	13.8206	0.000819912	0.887347	-0.402	SHISAL1	-
chr22	42772420	13.7105	0.000839567	0.887347	-0.479352								CpG_Shelf_2-4kb_Downstream
chr3	4750871	-13.4985	0.000879221	0.887347	0.686455	EGOT	-
chr8	141401575	13.4467	0.000889298	0.887347	-0.110245	PTP4A3	+
chr7	123647034	13.2601	0.000926854	0.887347	-0.186817
chr16	30787964	13.044	0.000973032	0.887347	-0.644721							CpG_Shore_2kb_Downstream		promoter_-_strand	ZNF629
chr18	2994775	12.9987	0.000983097	0.887347	-1.61878	LPIN2	-
chr7	130141133	12.946	0.000994973	0.887347	-0.485744						CpG: 81			promoter_+_strand	ENSG00000229196
chr19	13208759	12.9387	0.000996649	0.887347	-0.927488	CACNA1A	-	exon			CpG: 36	CpG_Shore_2kb_Downstream
chr15	78360508	12.8425	0.00101888	0.887347	-0.979228
chr9	93083228	12.7381	0.00104376	0.887347	-0.760054	SUSD3	+
chr1	156076746	12.6169	0.00107369	0.887347	-1.08801	MEX3A	-	exon			CpG: 90
chr7	137345905	12.6077	0.00107599	0.887347	-0.970269	ENSG00000228031	-
chr19	3823552	12.5853	0.00108166	0.887347	-0.539755	ZFR2	-					CpG_Shore_2kb_Upstream	CpG_Shelf_2-4kb_Downstream
chr12	52038156	12.4983	0.00110409	0.887347	-0.447082			exon	5'UTR			CpG_Shore_2kb_Downstream
chr11	415552	12.4061	0.0011285	0.887347	-0.783233	SIGIRR	-					CpG_Shore_2kb_Upstream
chr5	180328891	12.3881	0.00113336	0.887347	-0.676763	GFPT2	-
chr3	128823209	12.3249	0.00115059	0.887347	-0.611165
chr14	91257543	12.3215	0.00115153	0.887347	-0.634978								CpG_Shelf_2-4kb_Downstream	promoter_+_strand	ENSG00000260810
chr9	137294893	12.2949	0.00115891	0.887347	-0.264162	ENSG00000260996	-	exon			CpG: 153			promoter_+_strand	ENSG00000288234
chr14	91220185	12.2831	0.00116219	0.887347	-0.280691	DGLUCY	+
chr19	35879262	12.2132	0.00118195	0.887347	-0.930034	APLP1	+
chr20	50308961	12.213	0.00118201	0.887347	-0.580275	LINC01270	+
chr7	1640028	12.1747	0.00119303	0.887347	-0.736706
chr10	131231791	-12.1549	0.00119875	0.887347	0.359747	TCERG1L	-
chr8	127817887	12.0739	0.00122267	0.887347	-0.652799	PVT1	+
chr18	9709583	12.0305	0.00123572	0.887347	-0.219265	RAB31	+					CpG_Shore_2kb_Downstream
chr19	16442748	-11.9568	0.00125835	0.887347	0.478709	ENSG00000267703	+
chr22	45878943	11.9425	0.00126279	0.887347	-0.447939	ENSG00000235091	-	exon				CpG_Shore_2kb_Upstream
chr17	77541492	11.8744	0.00128426	0.887347	-1.18078
chr1	34266366	11.8278	0.00129926	0.887347	-0.579635
chr11	69654798	11.769	0.00131848	0.887347	-0.415047							CpG_Shore_2kb_Downstream
chr2	239267578	11.7039	0.00134022	0.887347	-0.509463	HDAC4	-
chr11	118792583	11.7026	0.00134067	0.887347	-0.396045	ENSG00000278376	+	exon				CpG_Shore_2kb_Downstream
chr1	3363382	11.6506	0.00135839	0.887347	-0.459573	PRDM16	+
chr10	71708125	11.6239	0.00136763	0.887347	-0.662672	CDH23	+
chr5	142358132	11.602	0.00137524	0.887347	-0.655799							CpG_Shore_2kb_Downstream
chr1	210238110	11.5631	0.0013889	0.887347	-0.260855	SERTAD4	+	exon					CpG_Shelf_2-4kb_Downstream
chr17	83090559	11.5468	0.00139469	0.887347	-1.08275	METRNL	+					CpG_Shore_2kb_Downstream	CpG_Shelf_2-4kb_Upstream
chr2	237600452	11.516	0.00140573	0.887347	-0.509549
chr1	1536056	11.4168	0.00144201	0.887347	-0.868045	TMEM240	-				CpG: 83	CpG_Shore_2kb_Upstream	CpG_Shelf_2-4kb_Upstream
chr16	1156453	11.3163	0.00148006	0.887347	-0.647775	CACNA1H	+					CpG_Shore_2kb_Upstream
chr19	49866420	11.2674	0.00149905	0.887347	-0.407071	PNKP	-	exon		3'UTR		CpG_Shore_2kb_Upstream	CpG_Shelf_2-4kb_Upstream
chr1	222244850	11.1506	0.00154577	0.887347	-0.85402	ENSG00000236230	-
chr7	35496091	11.1461	0.0015476	0.887347	-0.984177	ENSG00000235464	-	exon
chr19	51097504	11.0888	0.00157126	0.887347	-0.642363							CpG_Shore_2kb_Upstream
chr14	104882370	11.0678	0.00158004	0.887347	-0.360406	CEP170B	+					CpG_Shore_2kb_Upstream
chr11	64146337	-11.0546	0.0015856	0.887347	0.761299	MACROD1	-
chr10	33142414	11.0324	0.001595	0.887347	-0.571508
chr3	183553279	11.0176	0.0016013	0.887347	-0.580352	KLHL6	-
chr16	48156676	10.9998	0.00160897	0.887347	-0.588615									promoter_-_strand	ABCC12
chr2	239201706	10.9554	0.00162821	0.887347	-0.794808	HDAC4	-
chr4	81715932	10.9413	0.00163438	0.887347	-0.854331
chr16	1426784	10.8952	0.0016548	0.887347	-0.123658							CpG_Shore_2kb_Upstream
chr5	4868287	10.8826	0.00166044	0.887347	-0.806163	ENSG00000249941	+					CpG_Shore_2kb_Downstream
chr11	64729907	10.8765	0.00166318	0.887347	-0.7918	RASGRP2	-
chr1	15975032	10.858	0.00167156	0.887347	-0.334693	ZBTB17	-					CpG_Shore_2kb_Upstream
chr11	71241390	10.7493	0.00172172	0.887347	-0.432724	SHANK2	-
chr19	3063101	10.7423	0.00172503	0.887347	-1.199			exon	5'UTR			CpG_Shore_2kb_Downstream		promoter_-_strand	TLE5
chr6	43828850	10.723	0.00173414	0.887347	-0.968496	ENSG00000283573	+
chr4	8000707	10.7212	0.00173503	0.887347	-0.248634	ABLIM2	-
chr11	126104968	10.7165	0.00173725	0.887347	-0.257851
chr8	22056999	10.6824	0.0017536	0.887347	-1.13685	DMTN	+	exon	5'UTR		CpG: 20
chr1	183621876	10.6763	0.00175656	0.887347	-1.05829	ARPC5	-	exon		3'UTR
chr14	104141488	10.6702	0.00175948	0.887347	-0.20753	KIF26A	+						CpG_Shelf_2-4kb_Downstream
chr5	1109187	10.6699	0.00175964	0.887347	-0.533659	SLC12A7	-					CpG_Shore_2kb_Downstream	CpG_Shelf_2-4kb_Upstream
chr2	29201759	10.6034	0.00179225	0.887347	-1.47565	ALK	-
chr20	12318193	10.5874	0.00180023	0.887347	-0.558693	ENSG00000235292	-	exon
chr16	825456	10.5611	0.00181345	0.887347	-1.1532	ENSG00000287855	+				CpG: 37	CpG_Shore_2kb_Downstream
chr16	6682545	10.5599	0.00181401	0.887347	-0.684914
chr17	81407403	10.5574	0.00181528	0.887347	-0.660622	BAHCC1	+					CpG_Shore_2kb_Downstream	CpG_Shelf_2-4kb_Downstream
chr8	140219279	10.535	0.00182665	0.887347	-0.727296	TRAPPC9	-
chr1	153633560	10.4568	0.00186704	0.887347	-0.599865	ENSG00000271853	-					CpG_Shore_2kb_Upstream		promoter_+_strand	CHTOP
chr20	51021475	10.4347	0.00187869	0.887347	-1.1162	KCNG1	-					CpG_Shore_2kb_Upstream
chr1	13960485	10.4347	0.00187871	0.887347	-0.478596
chr10	133159727	10.4243	0.00188421	0.887347	-0.574467							CpG_Shore_2kb_Upstream		promoter_+_strand	KNDC1
chr9	136743845	10.4031	0.0018955	0.887347	-0.781146	ENSG00000204003	-						CpG_Shelf_2-4kb_Upstream	promoter_-_strand	LCN10
chr19	49970307	10.3853	0.00190503	0.887347	-0.763291	SIGLEC16	+
chr13	111220089	10.3832	0.00190619	0.887347	-1.37371	ARHGEF7	+
chr11	131761027	10.3141	0.00194388	0.887347	-0.545061
chr15	60615628	-10.3036	0.00194972	0.887347	0.630921	RORA-AS1	+
chr2	100953552	10.2919	0.00195621	0.887347	-0.535166	NPAS2	+
chr1	43509807	10.2905	0.001957	0.887347	-0.979871
chr2	8600103	10.2251	0.00199395	0.887347	-1.03473
chr16	86789197	10.222	0.00199572	0.887347	-1.14979
chr11	3643372	10.1919	0.00201303	0.887347	-0.208973							CpG_Shore_2kb_Downstream
chr17	8176890	10.1918	0.00201309	0.887347	-0.0547806	ENSG00000266824	+	exon				CpG_Shore_2kb_Downstream		promoter_-_strand	TMEM107
chr7	461763	10.1882	0.00201517	0.887347	-0.665613							CpG_Shore_2kb_Upstream
chr19	28300849	10.1383	0.0020444	0.887347	-0.928371	ENSG00000266928	-
chr1	12592577	10.1008	0.00206673	0.887347	-0.39621	DHRS3	-						CpG_Shelf_2-4kb_Upstream
chr22	35592555	10.0968	0.00206917	0.887347	-1.15192
chr2	216927368	-10.0681	0.00208649	0.887347	0.652991	ENSG00000236886	+
chr16	28553837	10.0658	0.00208787	0.887347	-0.74429	ENSG00000275441	-	exon			CpG: 68			promoter_+_strand	SGF29
chr11	126079001	10.0381	0.00210483	0.887347	-1.38905
chr15	89673378	-10.022	0.00211475	0.887347	0.420927	PLIN1	-	exon
chr9	134135000	9.97246	0.00214567	0.887347	-0.614287	WDR5-DT	-					CpG_Shore_2kb_Upstream
chr17	79836712	9.94002	0.00216625	0.887347	-1.38238	CBX4	-					CpG_Shore_2kb_Downstream	CpG_Shelf_2-4kb_Upstream
chr7	543516	-9.93793	0.00216758	0.887347	0.668225							CpG_Shore_2kb_Downstream
chr1	205505965	9.92859	0.00217356	0.887347	-0.48489	CDK18	+					CpG_Shore_2kb_Downstream
chr19	14035367	9.84334	0.00222914	0.887347	-0.674508	IL27RA	+						CpG_Shelf_2-4kb_Downstream
chr7	139995515	9.83863	0.00223227	0.887347	-0.301342	TBXAS1	+
chr19	1827517	9.77555	0.0022747	0.887347	-0.491781	REXO1	-	exon			CpG: 119
chr17	715999	9.76692	0.00228058	0.887347	-1.36279							CpG_Shore_2kb_Downstream
chr2	231401345	9.76104	0.00228461	0.887347	-0.255752								CpG_Shelf_2-4kb_Downstream
chr22	39292218	9.75579	0.00228821	0.887347	-0.737219						CpG: 17			promoter_+_strand	ENSG00000224794
chr14	101492750	9.73214	0.00230452	0.887347	-0.868622
chr10	77856792	9.71522	0.00231628	0.887347	-0.716304	DLG5	-	exon
chr15	43133031	9.68937	0.00233441	0.887347	-0.788314	ENSG00000285080	-					CpG_Shore_2kb_Upstream		promoter_+_strand	TMEM62
chr11	44974284	9.68348	0.00233856	0.887347	-0.194864	LINC02685	+	exon
chr5	116499061	9.66759	0.00234982	0.887347	-1.35074	SEMA6A-AS1	+	exon
chr7	5443862	9.66504	0.00235164	0.887347	-0.47755
chr10	100828759	9.65324	0.00236006	0.887347	-0.35857	PAX2	+	exon		3'UTR	CpG: 260	CpG_Shore_2kb_Upstream
chr13	114002527	9.638	0.00237099	0.887347	-1.01955	RASA3	-					CpG_Shore_2kb_Downstream	CpG_Shelf_2-4kb_Downstream
chr3	58021178	9.63521	0.002373	0.887347	-0.936081	FLNB	+
chr18	48937456	9.59099	0.00240514	0.887347	-0.496047	SMAD7	-
chr11	66885417	9.57836	0.00241443	0.887347	-0.594941	PC	-
chr13	99975674	9.5765	0.0024158	0.887347	-0.367334	ENSG00000288060	-						CpG_Shelf_2-4kb_Upstream
chr9	126650590	9.57312	0.00241829	0.887347	-0.486778	LMX1B	+
chr2	1715217	9.53596	0.00244594	0.887347	-0.678547	PXDN	-
chr1	157978974	9.53426	0.00244722	0.887347	-0.186526						CpG: 28
chr21	43854496	9.53373	0.00244762	0.887347	-0.492155
chr19	42248951	9.5011	0.00247227	0.887347	-0.843447	ERF	-	exon					CpG_Shelf_2-4kb_Downstream
chr19	5149133	9.50028	0.00247289	0.887347	-0.402655	KDM4B	+					CpG_Shore_2kb_Downstream	CpG_Shelf_2-4kb_Upstream
chr1	201409283	9.47423	0.00249281	0.887347	-0.505942	TNNI1	-
chr16	1428103	9.44444	0.00251586	0.887347	-1.08738							CpG_Shore_2kb_Upstream	CpG_Shelf_2-4kb_Upstream
chr17	38918735	9.44291	0.00251705	0.887347	-0.735445	LASP1	+	exon		3'UTR	CpG: 30
chr17	77695484	9.37018	0.00257455	0.887347	-0.615489
chr12	132191219	9.33605	0.00260213	0.887347	-0.817148							CpG_Shore_2kb_Downstream
chr18	45016823	-9.33572	0.00260239	0.887347	0.563262	SETBP1	+
chr17	81922926	9.3231	0.0026127	0.887347	-0.284745	ENSG00000264769	+	exon			CpG: 41		CpG_Shelf_2-4kb_Upstream
chr9	130906373	9.31639	0.00261819	0.887347	-0.65137	FIBCD1	-					CpG_Shore_2kb_Downstream
chr11	44666441	9.27076	0.00265599	0.887347	-0.746054
chr6	3380883	9.24338	0.00267902	0.887347	-1.0121	SLC22A23	-
chr2	70121195	9.2405	0.00268145	0.887347	-0.777185								CpG_Shelf_2-4kb_Upstream
chr4	1030579	9.23283	0.00268796	0.887347	-0.677473							CpG_Shore_2kb_Downstream	CpG_Shelf_2-4kb_Downstream
chr19	1824167	9.20653	0.00271043	0.887347	-0.636364	ENSG00000267244	+	exon				CpG_Shore_2kb_Downstream	CpG_Shelf_2-4kb_Upstream
chr9	126531640	9.20522	0.00271156	0.887347	-0.281585
chr9	116686689	9.20099	0.0027152	0.887347	-0.55111	ASTN2	-					CpG_Shore_2kb_Upstream		promoter_+_strand	TRIM32
chr1	244067396	9.1979	0.00271785	0.887347	-1.04856	ENSG00000279774	+	exon
chr12	105387881	9.16739	0.00274433	0.887347	-0.532877
chr19	14062254	9.16589	0.00274564	0.887347	-0.520797
chr16	85335825	9.16209	0.00274897	0.887347	-0.563635
chr11	69438817	9.16111	0.00274982	0.887347	-0.820036	ENSG00000255606	-	exon
chr4	2274825	9.15886	0.00275179	0.887347	-0.588731	ZFYVE28	-					CpG_Shore_2kb_Upstream
chr1	18066828	9.15531	0.00275491	0.887347	-0.535087	LINC01654	+
chr3	23167551	9.14374	0.00276509	0.887347	-0.945016
chr3	184773903	9.13852	0.00276969	0.887347	-0.973487									promoter_-_strand	LINC02069
chr15	75786497	9.13749	0.0027706	0.887347	-1.12683	ENSG00000187812	+
chr22	29702367	9.11034	0.00279475	0.887347	-0.694189
chr2	16283764	9.09844	0.00280542	0.887347	-0.278984	ENSG00000228876	+
chr10	129868746	9.07053	0.00283067	0.887347	-0.252083	EBF3	-					CpG_Shore_2kb_Downstream
chr20	58789373	9.05931	0.0028409	0.887347	-0.321558
chr14	64720471	9.04542	0.00285363	0.887347	-0.841401	PLEKHG3	+
chr1	243284586	9.02696	0.00287068	0.887347	-0.712464	SDCCAG8	+
chr9	128035466	9.01801	0.00287899	0.887347	-1.97853
chr14	104588145	9.01322	0.00288345	0.887347	-0.50018	C14orf180	+					CpG_Shore_2kb_Upstream
chr16	85717994	8.9529	0.00294043	0.887347	-1.19499	C16orf74	-
chr3	185172360	8.93698	0.00295571	0.887347	-0.68538	EHHADH-AS1	+
chr2	9643299	8.92897	0.00296344	0.887347	-0.94649	ENSG00000240687	+
chr12	68807419	8.92739	0.00296496	0.887347	-0.904902							CpG_Shore_2kb_Upstream
chr12	56630849	8.90257	0.00298911	0.887347	-0.976937	BAZ2A	-	exon	5'UTR			CpG_Shore_2kb_Downstream	CpG_Shelf_2-4kb_Upstream
chr19	18444494	8.90238	0.00298929	0.887347	-0.465375	ELL	-	exon		3'UTR		CpG_Shore_2kb_Upstream
chr11	64122328	8.89781	0.00299376	0.887347	-0.794376	MACROD1	-						CpG_Shelf_2-4kb_Downstream
chr11	72595644	8.89565	0.00299588	0.887347	-0.688434	PDE2A	-
chr17	81126323	8.88906	0.00300235	0.887347	-0.570134	AATK	-						CpG_Shelf_2-4kb_Upstream	promoter_-_strand	MIR657
chr1	43947625	8.87481	0.00301642	0.887347	-0.222631	IPO13	+	exon				CpG_Shore_2kb_Downstream
chr5	66770430	8.86181	0.00302932	0.887347	-1.08981
chr11	128937629	8.84752	0.00304358	0.887347	-0.943304	TP53AIP1	-	exon
chr2	72898570	8.83208	0.0030591	0.887347	-0.76213
chr17	75151225	8.82187	0.00306942	0.887347	-0.827645	JPT1	-						CpG_Shelf_2-4kb_Upstream
chr17	81422633	8.7715	0.00312099	0.887347	-0.601036	BAHCC1	+						CpG_Shelf_2-4kb_Downstream
chr9	136606119	8.76662	0.00312605	0.887347	-0.53926
chr3	44977224	8.75874	0.00313424	0.887347	-0.277691	EXOSC7	+	exon				CpG_Shore_2kb_Downstream
chr21	43729450	8.75473	0.00313842	0.887347	-0.398427	PDXK	+					CpG_Shore_2kb_Downstream
chr5	74901063	8.72144	0.0031734	0.887347	-1.32453	ENSG00000287701	-
chr12	104709501	8.71559	0.00317959	0.887347	-1.05485	CHST11	+
chr22	43298057	8.69389	0.00320273	0.887347	-0.724569	SCUBE1	-
chr17	83205475	8.68457	0.00321273	0.887347	-0.476749	ENSG00000262898	+
chr2	10763343	8.68272	0.00321473	0.887347	-0.745383	ATP6V1C2	+
chr1	148353883	-8.67751	0.00322035	0.887347	1.22002	LINC01138	-					CpG_Shore_2kb_Upstream
chr17	81052135	8.6301	0.00327204	0.887347	-0.822573	BAIAP2	+					CpG_Shore_2kb_Upstream
chr2	25315238	8.61637	0.00328723	0.887347	-0.633559	DNMT3A	-
chr5	76387655	8.61531	0.00328841	0.887347	-1.01736
chr2	9801532	8.61362	0.00329028	0.887347	-0.800499
chr3	184376675	8.61001	0.00329428	0.887347	-0.627743	THPO	-						CpG_Shelf_2-4kb_Upstream
chr12	6789480	8.59116	0.00331534	0.887347	-0.732475									promoter_+_strand	CD4
chr2	120765566	8.55157	0.00336013	0.887347	-0.729188
chr3	195761727	8.53909	0.00337442	0.887347	-0.876518	MUC4	-				CpG: 128
chr16	87864494	8.52287	0.00339311	0.887347	-0.805628	SLC7A5	-						CpG_Shelf_2-4kb_Downstream
chr11	64568252	8.50679	0.00341178	0.887347	-0.921982	SLC22A11	+				CpG: 36
chr1	235023359	-8.50334	0.0034158	0.887347	0.675641
chr11	87060039	8.50239	0.00341691	0.887347	-0.0762507	TMEM135	+
chr3	194086402	8.49862	0.0034213	0.887347	-1.59881	ENSG00000276407	+	exon
chr22	23150072	8.48697	0.00343496	0.887347	-0.805427	RAB36	+	exon
chr10	34918695	8.48475	0.00343757	0.887347	-0.297731
chr3	14622110	8.47687	0.00344686	0.887347	-0.823565	ENSG00000283392	+
chr17	77351961	8.4411	0.00348943	0.887347	-0.250303
chr16	1304015	8.43575	0.00349587	0.887347	-0.883933
chr10	70283700	8.42805	0.00350514	0.887347	-0.725666	NPFFR1	-	exon	5'UTR		CpG: 51
chr1	31562826	8.42637	0.00350717	0.887347	-0.293349	LINC01226	+
chr9	133460791	8.41373	0.00352248	0.887347	-1.08324	CACFD1	+					CpG_Shore_2kb_Downstream
chr1	928935	8.39048	0.00355089	0.887347	-0.363817	SAMD11	+						CpG_Shelf_2-4kb_Downstream
chr7	158488834	8.36781	0.00357887	0.887347	-0.528461	PTPRN2	-				CpG: 26	CpG_Shore_2kb_Upstream	CpG_Shelf_2-4kb_Downstream
chr22	49197773	8.3434	0.00360933	0.887347	-0.585812
chr14	30812447	8.29818	0.00366666	0.887347	-0.612146	ENSG00000258558	-
chr22	37346229	8.287	0.00368102	0.887347	-1.00541	ELFN2	-
chr4	8101233	8.28602	0.00368228	0.887347	-0.884262	ABLIM2	-						CpG_Shelf_2-4kb_Downstream
chr1	6127686	8.28047	0.00368944	0.887347	-1.05822	CHD5	-				CpG: 41	CpG_Shore_2kb_Upstream
chr14	105195711	8.24377	0.00373725	0.887347	-0.813955							CpG_Shore_2kb_Upstream	CpG_Shelf_2-4kb_Downstream
chr1	167683701	8.23054	0.00375469	0.887347	-0.619791	RCSD1	+
chr22	42342251	8.2298	0.00375567	0.887347	-0.569536							CpG_Shore_2kb_Upstream	CpG_Shelf_2-4kb_Downstream
chr1	183631842	8.2144	0.00377611	0.887347	-0.914111	ARPC5	-	exon					CpG_Shelf_2-4kb_Upstream
chr1	20491676	8.21151	0.00377996	0.887347	-0.499148
chr5	132012179	8.20232	0.00379224	0.887347	-0.903749	ENSG00000231585	+	exon				CpG_Shore_2kb_Downstream		promoter_-_strand	ENSG00000281938
chr17	63989028	8.20083	0.00379425	0.887347	-0.946533	ENSG00000263489	-
chr21	44292424	8.19813	0.00379787	0.887347	-0.629998	AIRE	+					CpG_Shore_2kb_Upstream
chr17	81966459	8.19083	0.00380767	0.887347	-1.46329	ENSG00000264735	-	exon					CpG_Shelf_2-4kb_Downstream
chr20	62069272	8.16026	0.00384914	0.887347	-1.6429								CpG_Shelf_2-4kb_Downstream
chr17	79103717	8.15891	0.00385099	0.887347	-0.656362	RBFOX3	-					CpG_Shore_2kb_Upstream
chr12	1912762	8.15848	0.00385158	0.887347	-0.587944	CACNA2D4	-
chr2	231661081	8.11829	0.00390705	0.887347	-1.15805							CpG_Shore_2kb_Upstream
chr14	101233512	8.09928	0.00393365	0.887347	-0.798453								CpG_Shelf_2-4kb_Downstream
chr17	80257719	8.09278	0.00394281	0.887347	-1.20729								CpG_Shelf_2-4kb_Upstream
chr22	50297097	8.07685	0.00396536	0.887347	-0.670462	PLXNB2	-						CpG_Shelf_2-4kb_Upstream
chr11	69438658	8.07402	0.00396938	0.887347	-0.543834	ENSG00000255606	-	exon
chr21	41379604	8.06916	0.00397631	0.887347	-0.278154	MX2	+
chr5	178233034	8.0637	0.00398411	0.887347	-0.942649							CpG_Shore_2kb_Downstream		promoter_-_strand	PHYKPL
chr1	23554190	8.0517	0.00400131	0.887347	-0.736982							CpG_Shore_2kb_Upstream
chr12	108609938	8.05051	0.00400302	0.887347	-0.830066
chr19	1286619	8.04611	0.00400936	0.887347	-0.356495	EFNA2	+					CpG_Shore_2kb_Upstream	CpG_Shelf_2-4kb_Upstream
chr9	136008263	8.04527	0.00401057	0.887347	-0.783994	NACC2	-	exon		3'UTR			CpG_Shelf_2-4kb_Upstream
chr19	1310444	8.0344	0.00402629	0.887347	-0.645881								CpG_Shelf_2-4kb_Upstream
chr8	143573276	8.02118	0.00404553	0.887347	-1.00937							CpG_Shore_2kb_Downstream	CpG_Shelf_2-4kb_Downstream	promoter_+_strand	ENSG00000255050
chr22	27311705	8.01162	0.00405949	0.887347	-0.995023	ENSG00000223726	-	exon
chr7	100682062	7.99906	0.00407797	0.887347	-0.513767	GIGYF1	-
chr21	44836796	-7.9937	0.00408588	0.887347	0.566593
chr19	38652557	7.97619	0.00411187	0.887347	-1.52746	ACTN4	+
chr1	3523395	7.95134	0.00414913	0.887347	-0.880368	MEGF6	-						CpG_Shelf_2-4kb_Downstream
chr6	111551765	7.92796	0.00418461	0.887347	-0.607199	TRAF3IP2-AS1	+
chr22	42289792	7.92434	0.00419014	0.887347	-0.398152							CpG_Shore_2kb_Upstream
chr21	45041712	7.92193	0.00419382	0.887347	-0.877602
chr3	194175727	7.9124	0.00420843	0.887347	-0.762161
chr11	308886	7.91019	0.00421183	0.887347	-0.74578	IFITM2	+	exon		3'UTR		CpG_Shore_2kb_Upstream
chr21	32377681	7.90219	0.00422416	0.887347	-0.419591	URB1	-							promoter_-_strand	SNORA80A
chr3	134363836	7.89165	0.00424049	0.887347	-0.262241	AMOTL2	-					CpG_Shore_2kb_Upstream	CpG_Shelf_2-4kb_Downstream
chr10	86663234	7.87928	0.00425975	0.887347	-0.308462	OPN4	+
chr5	1005659	7.87681	0.00426361	0.887347	-0.927813	ENSG00000272347	+	exon				CpG_Shore_2kb_Downstream	CpG_Shelf_2-4kb_Upstream
chr4	8343815	7.85593	0.00429643	0.887347	-0.223508							CpG_Shore_2kb_Upstream
chr3	119401906	7.84263	0.0043175	0.887347	-0.404212	ARHGAP31	+	exon				CpG_Shore_2kb_Upstream
chr19	55316854	7.83477	0.00433002	0.887347	-1.17962	TMEM150B	-	exon		3'UTR			CpG_Shelf_2-4kb_Downstream
chr12	6450976	7.81209	0.00436643	0.887347	-1.11091	CD27	+	exon
chr20	50928524	7.81135	0.00436762	0.887347	-0.455863	ADNP	-						CpG_Shelf_2-4kb_Upstream
chr5	76876415	7.80366	0.00438006	0.887347	-0.441516	S100Z	+
chr20	52552310	7.80101	0.00438436	0.887347	-1.04554	LINC01524	+
chr11	2166933	7.79943	0.00438692	0.887347	-2.07978	TH	-	exon		3'UTR	CpG: 77
chr3	184581966	7.79458	0.00439481	0.887347	-1.11978	EPHB3	+	exon		3'UTR		CpG_Shore_2kb_Upstream
chr20	61443412	7.7829	0.00441387	0.887347	-0.609391	CDH4	+
chr13	110485718	-7.76341	0.00444593	0.887347	0.73068	COL4A2	+	exon
chr5	139682895	7.75964	0.00445216	0.887347	-0.546698	CXXC5	+	exon				CpG_Shore_2kb_Downstream
chr12	120738201	7.75218	0.00446453	0.887347	-0.78655	ACADS	+					CpG_Shore_2kb_Upstream
chr1	6646648	-7.74815	0.00447124	0.887347	0.599963	DNAJC11	-	exon
chr7	101134902	7.73649	0.00449072	0.887347	-0.250686	SERPINE1	+
chr13	32585686	7.71046	0.00453458	0.887347	-0.687121							CpG_Shore_2kb_Upstream		promoter_+_strand	PDS5B
chr22	44119855	7.70115	0.00455041	0.887347	-1.23209	PARVB	+	exon
chr22	29688338	7.68722	0.00457423	0.887347	-0.949447	NF2	+
chr19	36013821	7.68569	0.00457686	0.887347	-0.459421	ALKBH6	-	exon	5'UTR			CpG_Shore_2kb_Upstream		promoter_+_strand	ENSG00000267698
chr1	226676566	-7.68341	0.00458078	0.887347	1.67407	ITPKB	-
chr20	50067209	7.67885	0.00458863	0.887347	-0.787593
chr10	133103161	7.67845	0.00458931	0.887347	-0.955	ADGRA1	+						CpG_Shelf_2-4kb_Upstream
chr22	39135237	7.67636	0.00459292	0.887347	-0.836992	ENSG00000279833	+	exon
chr12	95956906	7.67052	0.00460301	0.887347	-1.00285	AMDHD1	+	exon		3'UTR	CpG: 18
chr19	5686559	-7.66997	0.00460397	0.887347	0.345709	RPL36	+					CpG_Shore_2kb_Upstream	CpG_Shelf_2-4kb_Upstream
chr20	58569341	7.65585	0.00462849	0.887347	-0.895125	APCDD1L-DT	+
chr11	117299560	-7.65554	0.00462902	0.887347	0.634319	BACE1	-
chr1	161021681	-7.65301	0.00463343	0.887347	0.903478	ENSG00000270149	-					CpG_Shore_2kb_Downstream		promoter_-_strand	F11R
chr7	6165229	-7.65249	0.00463434	0.887347	0.432552	CYTH3	-					CpG_Shore_2kb_Upstream
chr11	64275523	7.64021	0.00465586	0.887347	-0.948034	BAD	-						CpG_Shelf_2-4kb_Downstream
chr17	45262735	-7.63145	0.00467127	0.887347	0.487097	MAP3K14-AS1	+	exon				CpG_Shore_2kb_Downstream		promoter_-_strand	SPATA32
chr5	134550959	-7.63054	0.00467288	0.887347	0.775271	JADE2	+
chr20	22763359	7.63046	0.00467302	0.887347	-0.704799
chr2	208044207	7.6192	0.00469295	0.887347	-0.449122
chr22	42364709	7.61781	0.00469541	0.887347	-0.5189	LINC01315	-	exon					CpG_Shelf_2-4kb_Upstream
chr19	38649836	7.61034	0.0047087	0.887347	-1.06847	ACTN4	+					CpG_Shore_2kb_Downstream
chr1	3352986	7.60166	0.00472422	0.887347	-0.270317	PRDM16	+
chr10	71319920	-7.59607	0.00473424	0.887347	0.507909	SLC29A3	+
chr17	79708546	7.59601	0.00473434	0.887347	-1.10663	LINC02078	+	exon
chr8	143058789	-7.5943	0.00473743	0.887347	0.712116									promoter_-_strand	AK3P2
chr2	130897643	7.58856	0.00474775	0.887347	-1.49349
chr1	44019916	7.57921	0.00476464	0.887347	-0.682858	SLC6A9	-
chr6	168093785	7.56879	0.00478356	0.887347	-0.235143									promoter_-_strand	FRMD1
chr1	77515771	7.56725	0.00478636	0.887347	-0.704464	AK5	+
chr12	7092670	7.55295	0.00481251	0.887347	-0.357812									promoter_-_strand	C1R
chr21	16588300	-7.5344	0.0048467	0.887347	0.602113	MIR99AHG	+
chr12	185275	7.52491	0.00486433	0.887347	-1.49208								CpG_Shelf_2-4kb_Upstream
chr14	105094293	7.51564	0.00488161	0.887347	-0.74008	LINC02298	+	exon				CpG_Shore_2kb_Downstream
chr15	85289972	-7.5032	0.00490495	0.887347	0.631775
chr16	87806662	7.49813	0.0049145	0.887347	-0.208784									promoter_-_strand	ENSG00000260177
chr2	16191049	7.49367	0.00492293	0.887347	-0.618753
chr3	130001497	7.49223	0.00492564	0.887347	-0.414411							CpG_Shore_2kb_Upstream
chr12	132132628	7.4791	0.00495057	0.887347	-0.774546								CpG_Shelf_2-4kb_Upstream
chr6	44276574	7.47301	0.00496219	0.887347	-1.46916	TMEM151B	+	exon		3'UTR	CpG: 162
chr5	150167408	7.46629	0.00497504	0.887347	-0.605668	CDX1	+				CpG: 102
chr13	85589148	7.46445	0.00497857	0.887347	-0.680644
chr10	73873421	7.45831	0.00499037	0.887347	-0.653652	CAMK2G	-	exon				CpG_Shore_2kb_Upstream
chr1	237049127	7.45516	0.00499645	0.887347	-0.823684	RYR2	+
chr19	14486550	7.43905	0.00502764	0.887347	-1.27524	GIPC1	-
chr3	129349574	7.42957	0.0050461	0.887347	-0.616775
chr7	108133411	7.41558	0.00507353	0.887347	-1.40292
chr1	1352298	7.4133	0.00507802	0.887347	-0.785535							CpG_Shore_2kb_Downstream	CpG_Shelf_2-4kb_Upstream
chr1	158007763	7.41009	0.00508435	0.887347	-0.364788	KIRREL1	+
chr9	34500759	7.40662	0.00509119	0.887347	-0.571338	DNAI1	+	exon
chr11	126442980	7.40545	0.00509351	0.887347	-0.78853	KIRREL3	-
chr6	155248092	-7.40501	0.00509438	0.887347	0.747862	TIAM2	+	exon
chr1	68296036	7.39926	0.00510578	0.887347	-0.445274
chr19	45765339	7.38805	0.00512807	0.887347	-0.589932	SIX5	-	exon		3'UTR		CpG_Shore_2kb_Upstream	CpG_Shelf_2-4kb_Upstream
chr2	11850276	7.38742	0.00512933	0.887347	-0.275217
#N/A	#N/A	7.38712	0.00512993	0.887347	-0.762038	#N/A	#N/A	#N/A	#N/A	#N/A	#N/A	#N/A	#N/A	#N/A	#N/A
chr1	160116369	7.38233	0.0051395	0.887347	-0.313713	ATP1A2	+
chr8	27976097	7.37433	0.00515554	0.887347	-0.492037	SCARA5	-
chr5	172777562	-7.37326	0.0051577	0.887347	0.514509	ENSG00000253736	+	exon
chr12	48884393	7.37267	0.00515889	0.887347	-0.473111
chr1	156894773	7.36381	0.00517673	0.887347	-0.55226	PEAR1	+					CpG_Shore_2kb_Downstream
chr16	88769594	7.35925	0.00518596	0.887347	-0.381539	PIEZO1	-						CpG_Shelf_2-4kb_Upstream
chr8	143520273	-7.35707	0.00519039	0.887347	0.579057	ZC3H3	-					CpG_Shore_2kb_Downstream
chr2	241903505	7.3488	0.00520718	0.887347	-0.893304							CpG_Shore_2kb_Downstream
chr3	69200771	7.34629	0.0052123	0.887347	-0.811073	FRMD4B	-	exon	5'UTR
chr15	73771733	7.34118	0.00522273	0.887347	-0.637585
chr12	123535057	7.33366	0.00523813	0.887347	-0.543325							CpG_Shore_2kb_Downstream
chr9	124079439	7.32816	0.00524943	0.887347	-0.373863
chr10	27779954	7.3133	0.00528013	0.887347	-1.38866
chr1	2543245	7.3066	0.00529405	0.887347	-0.604227	ENSG00000272449	+						CpG_Shelf_2-4kb_Upstream
chr19	13340071	7.29797	0.00531204	0.887347	-0.297393	CACNA1A	-
chr9	126642494	7.28506	0.00533912	0.887347	-0.933458	LMX1B	+
chr16	11308376	7.28402	0.0053413	0.887347	-0.910167
chr5	175880017	7.28088	0.00534793	0.887347	-0.568567	CPLX2	+	exon
chr20	64049866	-7.2737	0.00536309	0.887347	0.707365			exon			CpG: 237			promoter_-_strand	SOX18
chr10	124011210	7.26674	0.00537786	0.887347	-0.22649	CHST15	-
chr4	87560029	7.25815	0.00539614	0.887347	-0.773268
chr6	161415702	7.25573	0.00540131	0.887347	-0.631353	PRKN	-
chr8	100494507	7.25274	0.00540771	0.887347	-0.208	ENSG00000253666	+
chr15	67820309	7.24786	0.00541815	0.887347	-0.711852	SKOR1	+					CpG_Shore_2kb_Upstream	CpG_Shelf_2-4kb_Upstream
chr1	44029466	7.24027	0.00543448	0.887347	-1.06794	SLC6A9	-					CpG_Shore_2kb_Upstream
chr1	9198741	7.23959	0.00543595	0.887347	-0.350797			exon			CpG: 38
chr16	566222	7.23278	0.00545064	0.887347	-0.435399							CpG_Shore_2kb_Downstream	CpG_Shelf_2-4kb_Upstream	promoter_+_strand	NHLRC4
chr7	100157427	7.21404	0.00549135	0.887347	-0.779918	TRAPPC14	-	exon	5'UTR	3'UTR		CpG_Shore_2kb_Upstream		promoter_-_strand	MIR4658
chr15	74783626	7.21133	0.00549729	0.887347	-0.548086	CSK	+					CpG_Shore_2kb_Downstream
chr11	111914122	7.20954	0.0055012	0.887347	-0.214498	HSPB2-C11orf52	+
chr2	26172204	7.20909	0.0055022	0.887347	-0.528722							CpG_Shore_2kb_Upstream		promoter_+_strand	GAREM2
chr19	50550743	7.16585	0.00559793	0.887347	-0.509656	LRRC4B	-					CpG_Shore_2kb_Downstream
chr10	1740122	7.15159	0.00562999	0.887347	-0.647916								CpG_Shelf_2-4kb_Downstream
chr17	50558619	7.13903	0.00565845	0.887347	-0.62984	CACNA1G-AS1	-					CpG_Shore_2kb_Upstream
chr5	525142	7.13212	0.00567416	0.887347	-0.775505	ENSG00000250385	+					CpG_Shore_2kb_Downstream	CpG_Shelf_2-4kb_Upstream	promoter_-_strand	SLC9A3
chr8	789345	7.12987	0.00567931	0.887347	-0.885597								CpG_Shelf_2-4kb_Downstream
chr21	46225464	7.12525	0.00568986	0.887347	-1.00006	LSS	-						CpG_Shelf_2-4kb_Upstream
chr10	80133340	7.12276	0.00569556	0.887347	-0.567593	PLAC9	+					CpG_Shore_2kb_Downstream
chr9	129664262	7.11328	0.00571733	0.887347	-0.852999							CpG_Shore_2kb_Upstream
chr21	28738605	7.10806	0.00572937	0.887347	-0.7506
chr1	27637608	7.1079	0.00572975	0.887347	-0.567387								CpG_Shelf_2-4kb_Downstream
chr10	133335826	7.1004	0.00574709	0.887347	-0.986965	CALY	-				CpG: 200
chr19	55083234	7.08341	0.00578668	0.887347	-0.40958	EPS8L1	+					CpG_Shore_2kb_Upstream	CpG_Shelf_2-4kb_Upstream
chr2	85277006	7.08085	0.00579267	0.887347	-0.635434	TCF7L1	+
chr1	202223025	7.06212	0.00583677	0.887347	-1.09632	LGR6	+
chr1	26529273	7.05405	0.0058559	0.887347	-0.539331							CpG_Shore_2kb_Upstream		promoter_+_strand	RPS6KA1
chr19	50501929	7.04943	0.0058669	0.887347	-0.763749
chr1	89610026	7.04863	0.00586882	0.887347	-0.70683	LRRC8C-DT	-
chr19	5127969	7.04117	0.00588662	0.887347	-0.186458	KDM4B	+
chr9	36137643	7.02125	0.00593455	0.887347	-0.557761	GLIPR2	+					CpG_Shore_2kb_Downstream
chr1	181178467	7.01834	0.00594161	0.887347	-0.602207	LINC01732	+
chr10	24354254	7.00019	0.00598578	0.887347	-0.57427	KIAA1217	+
chr7	100868618	6.99997	0.00598633	0.887347	-0.669248	TRIP6	+	exon		3'UTR			CpG_Shelf_2-4kb_Downstream
chr9	122342848	6.99355	0.00600206	0.887347	-1.52765								CpG_Shelf_2-4kb_Upstream
chr11	70755814	6.99221	0.00600535	0.887347	-0.303673	SHANK2	-
chr11	67302043	6.98833	0.0060149	0.887347	-0.547614	ANKRD13D	+					CpG_Shore_2kb_Upstream
chr10	69716443	6.97493	0.006048	0.887347	-0.568682
chr15	40334117	6.97493	0.006048	0.887347	-1.14596	CCDC9B	-	exon		3'UTR
chr8	143949533	6.96389	0.00607547	0.887347	-0.335264	PLEC	-					CpG_Shore_2kb_Upstream	CpG_Shelf_2-4kb_Upstream
chr12	9416693	6.95958	0.00608625	0.887347	-0.929559	ENSG00000278635	+	exon
chr15	66025082	6.95476	0.0060983	0.887347	-0.737883	MEGF11	-
chr14	100712481	6.95158	0.00610629	0.887347	-1.21962								CpG_Shelf_2-4kb_Downstream
chr15	64537451	6.93745	0.00614192	0.887347	-0.282965	ZNF609	+
chr1	9268839	6.93454	0.00614927	0.887347	-1.41654	H6PD	+	exon		3'UTR			CpG_Shelf_2-4kb_Downstream
chr16	88764957	6.92346	0.00617745	0.887347	-1.06777	PIEZO1	-
chr9	88502864	6.92256	0.00617974	0.887347	-0.888649
chr16	69925063	6.91775	0.00619203	0.887347	-1.08408	WWP2	+	exon	5'UTR
chr21	45012121	6.91107	0.00620915	0.887347	-1.57739
chr6	11279722	6.90595	0.00622233	0.887347	-0.476284	NEDD9	-
chr9	134327835	6.90396	0.00622745	0.887347	-0.439461	RXRA	+					CpG_Shore_2kb_Downstream
chr18	24395916	6.90136	0.00623415	0.887347	-0.856119	OSBPL1A	-					CpG_Shore_2kb_Upstream
chr17	63931850	-6.87938	0.00629122	0.887347	0.874052	CD79B	-							promoter_-_strand	ENSG00000285947
chr21	44206976	6.87616	0.00629964	0.887347	-1.14699	ENSG00000232124	-
chr3	9843161	6.86795	0.00632118	0.887347	-0.692044	RPUSD3	-	exon				CpG_Shore_2kb_Upstream
chr1	21523603	6.86613	0.00632597	0.887347	-0.378969	ALPL	+
chr22	19629388	6.8609	0.00633976	0.887347	-0.919274
chr8	37691729	6.85988	0.00634244	0.887347	-0.444139								CpG_Shelf_2-4kb_Upstream
chr6	111622693	6.85485	0.00635573	0.887347	-0.734005
chr17	75128545	6.84872	0.006372	0.887347	-0.943458	ARMC7	+					CpG_Shore_2kb_Upstream	CpG_Shelf_2-4kb_Upstream
chr8	143481701	6.83505	0.00640845	0.887347	-0.296587	ZC3H3	-					CpG_Shore_2kb_Upstream
chr19	47244685	6.83252	0.00641522	0.887347	-0.423863							CpG_Shore_2kb_Downstream
chr11	72626163	6.82775	0.00642802	0.887347	-1.07436	PDE2A	-
chr17	19511191	6.82612	0.0064324	0.887347	-0.492257								CpG_Shelf_2-4kb_Downstream
chr12	111154475	6.82323	0.00644017	0.887347	-0.824978	CUX2	+
chr19	54465587	6.82191	0.00644374	0.887347	-0.597045	CDC42EP5	-				CpG: 236
chr11	64015752	6.81968	0.00644975	0.887347	-0.600883	MACROD1	-
chr11	119790289	-6.79978	0.00650377	0.887347	0.883925
chr11	75339906	6.79208	0.00652483	0.887347	-0.741273	ARRB1	-
chr5	138458464	6.77851	0.00656216	0.887347	-0.519277
chr10	133267370	6.77413	0.00657426	0.887347	-0.843633	ADAM8	-	exon					CpG_Shelf_2-4kb_Upstream
chr20	63015184	6.77066	0.00658387	0.887347	-0.287719	LINC01749	+
chr19	1827105	6.76257	0.00660635	0.887347	-0.931439	REXO1	-	exon			CpG: 119
chr6	151334920	6.72969	0.00669882	0.887347	-0.381549	AKAP12	+
chr17	6434874	6.72943	0.00669955	0.887347	-1.31738	AIPL1	-
chr16	85470410	6.72818	0.00670308	0.887347	-0.635841
chr11	68652162	6.72278	0.00671846	0.887347	-0.350101
chr20	23994724	6.71828	0.00673128	0.887347	-0.463581
chr18	79520481	6.71239	0.00674814	0.887347	-1.20865	NFATC1	+					CpG_Shore_2kb_Downstream	CpG_Shelf_2-4kb_Upstream
chr13	40597914	6.71227	0.00674846	0.887347	-0.771884	FOXO1	-
chr3	4719512	6.70493	0.00676953	0.887347	-0.832358	ITPR1	+
chr16	57532892	6.70463	0.0067704	0.887347	-0.281189	CCDC102A	-						CpG_Shelf_2-4kb_Upstream
chr19	17076778	6.6903	0.0068118	0.887347	-0.560238	MYO9B	+					CpG_Shore_2kb_Downstream
chr5	139392135	6.68923	0.00681492	0.887347	-0.927139	PROB1	-	exon			CpG: 316
chr17	17851016	-6.68774	0.00681924	0.887347	1.31906	TOM1L2	-	exon
chr11	76785124	6.68656	0.00682267	0.887347	-0.418309	TSKU	+					CpG_Shore_2kb_Downstream
chr3	65954390	6.68536	0.00682615	0.887347	-1.10743	MAGI1	-
chr10	125151645	6.67381	0.00685985	0.887347	-0.57571	CTBP2	-				CpG: 103
chr1	26694084	6.66923	0.00687326	0.887347	-0.831068	ENSG00000260063	-	exon				CpG_Shore_2kb_Upstream
chr6	3386514	6.64461	0.00694603	0.887347	-0.87002	SLC22A23	-
chr22	38756469	6.63641	0.00697048	0.887347	-0.627261	SUN2	-				CpG: 132
chr7	1469833	6.63378	0.00697838	0.887347	-0.402598								CpG_Shelf_2-4kb_Upstream
chr17	21367245	6.62862	0.00699383	0.887347	-0.452651
chr22	29597489	6.62781	0.00699627	0.887347	-0.147685
chr20	46306108	6.6234	0.00700953	0.887347	-0.812589	CDH22	-					CpG_Shore_2kb_Upstream
chr10	71005862	6.6198	0.0070204	0.887347	-0.740008	ENSG00000285300	+
chr9	130529842	6.60486	0.00706568	0.887347	-0.77473
chr7	2633757	6.59599	0.00709273	0.887347	-0.588971	TTYH3	+					CpG_Shore_2kb_Downstream
chr20	62410945	6.58084	0.00713927	0.887347	-0.532607	RBBP8NL	-	exon					CpG_Shelf_2-4kb_Downstream
chr1	944071	6.57073	0.00717056	0.887347	-0.951283	SAMD11	+	exon				CpG_Shore_2kb_Downstream
chr19	5691761	-6.56651	0.00718366	0.887347	0.552001			exon		3'UTR	CpG: 158		CpG_Shelf_2-4kb_Upstream
chr12	124552130	6.56099	0.00720085	0.887347	-0.605789								CpG_Shelf_2-4kb_Upstream
chr6	43123073	6.55716	0.00721284	0.887347	-1.09006	PTK7	+
chr22	50060085	6.55199	0.00722902	0.887347	-0.79979	MLC1	-	exon		3'UTR		CpG_Shore_2kb_Downstream
chr2	160271332	6.5418	0.00726106	0.887347	-0.844171							CpG_Shore_2kb_Downstream
chr17	50259744	6.54145	0.00726219	0.887347	-0.859685
chr1	161167412	6.54034	0.00726567	0.887347	-0.315601	PPOX	+	exon		3'UTR		CpG_Shore_2kb_Downstream
chr2	1727206	6.53178	0.00729277	0.887347	-0.86876	PXDN	-
chr22	36367387	6.5272	0.00730733	0.887347	-0.446112	MYH9	-
chr18	23690583	6.52235	0.00732278	0.887347	-0.596513	LAMA3	+					CpG_Shore_2kb_Downstream
chr20	63364251	6.51689	0.0073402	0.887347	-0.932254	ENSG00000203900	+	exon					CpG_Shelf_2-4kb_Downstream
chr2	105397266	6.51432	0.00734843	0.887347	-0.591896	FHL2	-					CpG_Shore_2kb_Upstream
chr16	88500032	6.51273	0.00735354	0.887347	-0.423434	ZFPM1	+						CpG_Shelf_2-4kb_Upstream
chr6	14922496	6.50756	0.00737014	0.887347	-1.21696
chr16	1326100	6.5064	0.00737389	0.887347	-0.858759	UBE2I	+	exon		3'UTR
chr2	234976515	6.50259	0.00738616	0.887347	-0.361791	SH3BP4	+
chr16	17070736	6.50195	0.00738824	0.887347	-1.34255
chr3	14802507	6.49855	0.00739921	0.887347	-0.700606	LINC02011	-	exon
chr19	42314583	6.4975	0.00740262	0.887347	-0.612092	TMEM145	+					CpG_Shore_2kb_Downstream
chr7	74224405	6.49202	0.00742037	0.887347	-0.722639	LAT2	+
chr9	136692267	6.48963	0.00742812	0.887347	-0.485177							CpG_Shore_2kb_Upstream	CpG_Shelf_2-4kb_Upstream
chr15	78811727	6.4867	0.00743765	0.887347	-0.837787						CpG: 160			promoter_-_strand	ADAMTS7
chr19	17779909	6.47441	0.00747782	0.887347	-0.541477	FCHO1	+
chr17	7027529	6.46919	0.00749495	0.887347	-0.837404	BCL6B	+	exon					CpG_Shelf_2-4kb_Downstream
chr15	68208910	6.46825	0.00749805	0.887347	-0.670444	CLN6	-
chr19	6481772	6.4638	0.00751271	0.887347	-0.33305	DENND1C	-	exon	5'UTR
chr4	7510291	6.45105	0.00755493	0.887347	-1.85209	SORCS2	+				CpG: 42
chr10	14330158	6.44337	0.00758051	0.887347	-0.441848	FRMD4A	-	exon	5'UTR
chr14	100834493	6.44311	0.0075814	0.887347	-0.814895	ENSG00000258663	-	exon
chr17	62629394	6.43357	0.00761331	0.887347	-0.0436068	MRC2	+					CpG_Shore_2kb_Downstream
chr15	78303769	6.43263	0.00761647	0.887347	-1.02375
chr1	16162065	-6.43096	0.00762209	0.887347	0.78407
chr2	240460863	6.41662	0.00767052	0.887347	-0.469762	GPC1	+					CpG_Shore_2kb_Upstream	CpG_Shelf_2-4kb_Upstream
chr17	81976562	6.41328	0.00768185	0.887347	-0.482278							CpG_Shore_2kb_Upstream
chr1	210265864	6.4125	0.0076845	0.887347	-1.60677	ST13P19	-	exon
chr3	13418875	6.40738	0.00770194	0.887347	-0.638001	NUP210	-					CpG_Shore_2kb_Upstream
chr1	116765377	6.40671	0.0077042	0.887347	-1.34457	CD2	+
chr7	155459783	6.40635	0.00770545	0.887347	-0.871865	EN2	+					CpG_Shore_2kb_Downstream	CpG_Shelf_2-4kb_Upstream
chr17	76241248	6.40399	0.00771349	0.887347	-0.34749							CpG_Shore_2kb_Downstream		promoter_-_strand	RNF157
chr17	49862980	6.39961	0.00772847	0.887347	-0.808781
chr1	10682288	6.39899	0.0077306	0.887347	-0.777196	CASZ1	-
chr15	74816520	6.39027	0.00776055	0.887347	-0.641144	LMAN1L	+	exon
chr8	7546343	6.38171	0.00779009	0.887347	-0.449758
chr19	50921970	6.37538	0.00781205	0.887347	-0.506942
chr6	34535862	6.37149	0.00782558	0.887347	-0.39008
chr2	237864222	6.37026	0.00782986	0.887347	-0.205222	RAMP1	+
chr13	19601754	6.36779	0.00783845	0.887347	-0.518724							CpG_Shore_2kb_Upstream
chr12	70646231	6.36741	0.00783979	0.887347	-1.16856	PTPRR	-
chr18	48976750	6.36245	0.00785711	0.887347	-1.04623							CpG_Shore_2kb_Downstream
chr1	228723644	6.36103	0.0078621	0.887347	-0.372177
chr22	43740814	6.36052	0.00786389	0.887347	-0.94875	EFCAB6	-
chr17	48489958	6.358	0.00787272	0.887347	-0.599994								CpG_Shelf_2-4kb_Upstream
chr19	1469305	6.35294	0.0078905	0.887347	-0.96341	APC2	+	exon			CpG: 621		CpG_Shelf_2-4kb_Upstream
chr1	160190315	6.34822	0.00790712	0.887347	-0.589557									promoter_+_strand	CASQ1
chr14	64193954	6.34676	0.00791229	0.887347	-1.22725	SYNE2	+
chr21	31560085	-6.34102	0.0079326	0.887347	0.606691	ENSG00000237594	+	exon				CpG_Shore_2kb_Downstream
chr4	17636748	-6.3399	0.00793656	0.887347	0.655542	FAM184B	-
chr1	10706711	6.33851	0.00794148	0.887347	-0.614173	CASZ1	-					CpG_Shore_2kb_Downstream
chr6	63632974	6.33728	0.00794587	0.887347	-0.461545								CpG_Shelf_2-4kb_Upstream
chr14	73228309	6.33545	0.00795236	0.887347	-0.102026
chr2	15945634	6.32748	0.00798076	0.887347	-0.517534	MYCN	+	exon					CpG_Shelf_2-4kb_Downstream
chr1	9304124	6.31399	0.00802914	0.887347	-0.385325	SPSB1	+
chr18	22816718	6.30768	0.00805188	0.887347	-0.878297	ENSG00000265943	-
chr20	63347313	6.3073	0.00805326	0.887347	-1.46291	CHRNA4	-				CpG: 26	CpG_Shore_2kb_Upstream
chr14	58632033	6.30639	0.00805657	0.887347	-0.366226
chr9	136531067	6.30582	0.00805862	0.887347	-0.667299	NOTCH1	-					CpG_Shore_2kb_Upstream	CpG_Shelf_2-4kb_Upstream
chr10	72322404	6.30047	0.00807801	0.887347	-1.03928								CpG_Shelf_2-4kb_Downstream
chr17	50147355	6.2986	0.00808481	0.887347	-0.725923	PPP1R9B	-					CpG_Shore_2kb_Upstream
chr20	61742232	6.29365	0.00810283	0.887347	-0.174341	ENSG00000225106	-
chr5	175879062	-6.28671	0.00812816	0.887347	1.4103	CPLX2	+	exon
chr7	100678950	6.27891	0.00815675	0.887347	-0.623778	GNB2	+	exon		3'UTR			CpG_Shelf_2-4kb_Downstream
chr2	178193034	6.27845	0.00815845	0.887347	-0.480375							CpG_Shore_2kb_Upstream
chr22	26784196	6.27665	0.00816507	0.887347	-0.304717
chr17	50096192	6.2743	0.00817373	0.887347	-0.678462	PDK2	+	exon	5'UTR			CpG_Shore_2kb_Downstream
chr16	1158587	6.2676	0.00819846	0.887347	-0.951936	CACNA1H	+					CpG_Shore_2kb_Downstream	CpG_Shelf_2-4kb_Downstream	promoter_-_strand	ENSG00000260403
chr5	150483691	6.26547	0.00820635	0.887347	-1.21417	NDST1-AS1	-					CpG_Shore_2kb_Upstream
chr1	1539426	6.26343	0.00821391	0.887347	-0.6464	TMEM240	-	exon		3'UTR		CpG_Shore_2kb_Upstream	CpG_Shelf_2-4kb_Downstream
chr12	124549329	6.25556	0.00824318	0.887347	-0.559525
chr9	19541928	6.24827	0.00827041	0.887347	-0.66731	SLC24A2	-
chr1	94599342	6.24826	0.00827044	0.887347	-0.990379
chr1	10707074	6.24638	0.00827749	0.887347	-0.822926	CASZ1	-						CpG_Shelf_2-4kb_Downstream
chr6	11279719	6.24432	0.00828521	0.887347	-0.949347	NEDD9	-
chr8	127798629	-6.24294	0.00829038	0.887347	0.657904	PVT1	+						CpG_Shelf_2-4kb_Downstream
chr16	4319573	6.23555	0.00831821	0.887347	-0.524169	GLIS2	+						CpG_Shelf_2-4kb_Downstream
chr14	104932493	6.23387	0.00832455	0.887347	-0.863732	PLD4	+				CpG: 209
chr17	78239306	6.23027	0.00833816	0.887347	-1.09879	TMEM235	+
chr10	124355195	6.22851	0.00834479	0.887347	-0.154245
chr8	20254450	6.22579	0.00835511	0.887347	-0.582953	LZTS1	-
chr1	22797858	-6.22412	0.00836145	0.887347	0.695366	EPHB2	+
chr19	4344432	6.222	0.00836951	0.887347	-0.279481	MPND	+					CpG_Shore_2kb_Downstream
chr9	133701233	6.22085	0.00837389	0.887347	-0.586073	SARDH	-					CpG_Shore_2kb_Upstream
chr1	201944407	6.21288	0.00840428	0.887347	-0.725414	LMOD1	-
chr9	63384656	6.20726	0.0084258	0.887347	-1.42326	BMS1P10	-
chr11	65587098	-6.20697	0.00842692	0.887347	0.811196	EHBP1L1	+					CpG_Shore_2kb_Downstream
chr20	39257968	6.20691	0.00842715	0.887347	-0.634368
chr22	29704694	-6.20376	0.00843925	0.887347	0.328322
chr17	78378240	6.20044	0.00845203	0.887347	-0.608063							CpG_Shore_2kb_Upstream		promoter_+_strand	PGS1
chr17	81636264	6.19836	0.00846003	0.887347	-0.413971	NPLOC4	-					CpG_Shore_2kb_Upstream		promoter_+_strand	TSPAN10
chr19	560266	6.19362	0.00847833	0.887347	-0.712103
chr10	133015042	6.19304	0.00848059	0.887347	-0.924011	ENSG00000289039	+					CpG_Shore_2kb_Upstream
chr6	51353112	6.18691	0.00850434	0.887347	-1.87469
chr1	10712771	6.18161	0.00852495	0.887347	-0.651313	CASZ1	-
chr22	43957000	6.18027	0.00853019	0.887347	-0.768866	SAMM50	+					CpG_Shore_2kb_Downstream		promoter_+_strand	RPL35AP36
chr1	111988812	6.17752	0.00854089	0.887347	-0.852032	KCND3	-	exon	5'UTR			CpG_Shore_2kb_Upstream
chr2	2324621	6.1703	0.00856916	0.887347	-0.457421	MYT1L-AS1	+	exon	5'UTR
chr17	45121281	6.16708	0.00858179	0.887347	-1.69712	PLCD3	-	exon			CpG: 65
chr21	45455593	6.16321	0.00859701	0.887347	-0.581312	COL18A1	+	exon				CpG_Shore_2kb_Upstream
chr19	2585995	6.15931	0.00861241	0.887347	-0.436108	GNG7	-						CpG_Shelf_2-4kb_Upstream
chr6	44128688	6.15476	0.00863041	0.887347	-1.15514	TMEM63B	+					CpG_Shore_2kb_Downstream
chr1	19643319	6.15422	0.00863252	0.887347	-2.02046	NBL1	+	exon				CpG_Shore_2kb_Upstream
chr8	142002626	6.15282	0.00863806	0.887347	-0.641929
chr5	150208991	6.14885	0.00865382	0.887347	-0.131749	SLC6A7	+
chr3	197425363	6.14057	0.00868683	0.887347	-0.64473
chr12	13274145	6.13997	0.00868922	0.887347	-1.16334	ENSG00000286869	-
chr17	75750121	6.13274	0.00871813	0.887347	-0.409536	ITGB4	+	exon					CpG_Shelf_2-4kb_Upstream
chr6	169722889	6.13172	0.00872222	0.887347	-0.509845	PHF10	-					CpG_Shore_2kb_Upstream
chr3	50274805	6.13065	0.00872656	0.887347	-0.479776	SEMA3B	+	exon				CpG_Shore_2kb_Upstream
chr20	57106563	6.12929	0.008732	0.887347	-0.934429	ENSG00000231078	+						CpG_Shelf_2-4kb_Upstream
chr11	894956	6.12074	0.00876648	0.887347	-0.641639	CHID1	-
chr12	130780567	6.11956	0.00877122	0.887347	-0.647876
chr16	84952461	-6.1157	0.00878686	0.887347	0.525565
chr18	69905172	6.1046	0.00883198	0.887347	-1.09965	CD226	-
chr20	50475485	6.10421	0.00883358	0.887347	-0.390061
chr5	81394595	6.104	0.00883443	0.887347	-0.738248							CpG_Shore_2kb_Downstream		promoter_-_strand	ACOT12
chr16	57276770	6.10011	0.00885033	0.887347	-0.867236	PLLP	-
chr14	100757838	6.09679	0.00886394	0.887347	-0.836058
chr20	46732035	6.09677	0.00886404	0.887347	-1.91063	SLC2A10	+
chr9	35910084	6.09418	0.00887465	0.887347	-0.424071	SPAAR	+	exon	5'UTR
chr10	116771567	6.08656	0.00890602	0.887347	-0.415395
chr22	38448292	6.08562	0.0089099	0.887347	-0.730905	KCNJ4	-
chr6	132490644	6.0849	0.00891288	0.887347	-1.08681	STX7	-
chr17	49555113	6.07973	0.00893427	0.887347	-1.19001	NGFR-AS1	-					CpG_Shore_2kb_Upstream
chr18	78238978	6.07606	0.00894947	0.887347	-1.96433						CpG: 43
chr4	5165975	6.07399	0.00895805	0.887347	-1.04271	STK32B	+
chr9	129493853	6.06809	0.00898266	0.887347	-0.623634	LINC00963	+						CpG_Shelf_2-4kb_Upstream
chr16	11276179	6.06302	0.00900383	0.887347	-0.769032	PRM2	-	exon			CpG: 23
chr1	22686094	-6.062	0.0090081	0.887347	1.03773
chr16	85351170	6.05808	0.00902454	0.887347	-1.12246	ENSG00000287946	-
chr14	105480219	6.05714	0.00902846	0.887347	-0.962802							CpG_Shore_2kb_Downstream
chr17	81338880	6.0548	0.00903833	0.887347	-0.585961								CpG_Shelf_2-4kb_Upstream
chr11	1924864	6.05391	0.00904204	0.887347	-0.815711	TNNT3	+					CpG_Shore_2kb_Upstream	CpG_Shelf_2-4kb_Upstream
chr5	145937715	6.048	0.00906699	0.887347	-0.249694							CpG_Shore_2kb_Downstream		promoter_+_strand	SH3RF2
chr15	75248066	-6.0295	0.00914555	0.887347	0.931079
chr7	150945105	6.02576	0.00916155	0.887347	-0.819741	KCNH2	-	exon		3'UTR			CpG_Shelf_2-4kb_Upstream
chr15	65421073	6.01973	0.00918739	0.887347	-0.779232	IGDCC4	-					CpG_Shore_2kb_Upstream
chr1	1163899	6.01959	0.00918801	0.887347	-0.535815						CpG: 180
chr2	235836345	6.00343	0.00925782	0.887347	-0.170887	AGAP1	+
chr9	131260253	6.00122	0.00926741	0.887347	-0.267015	FAM78A	-	exon		3'UTR		CpG_Shore_2kb_Upstream
chr11	17730641	5.99847	0.00927938	0.887347	-0.748207								CpG_Shelf_2-4kb_Upstream
chr20	57481257	5.99506	0.00929424	0.887347	-1.33182
chr5	56996476	-5.99396	0.00929904	0.887347	1.05006
chr5	68682420	5.99196	0.00930777	0.887347	-0.558508	ENSG00000250237	-
chr7	155405612	5.98972	0.00931755	0.887347	-1.07846
chr19	5338025	-5.98556	0.00933579	0.887347	0.599569							CpG_Shore_2kb_Upstream	CpG_Shelf_2-4kb_Downstream
chr17	43124569	5.98459	0.00934008	0.887347	-0.516139	BRCA1	-					CpG_Shore_2kb_Upstream		promoter_+_strand	NBR2
chr17	1487444	5.97626	0.00937673	0.887347	-0.648191	MYO1C	-				CpG: 233		CpG_Shelf_2-4kb_Upstream
chr1	10716602	5.97601	0.00937782	0.887347	-0.473286	CASZ1	-
chr17	41810812	5.97293	0.00939145	0.887347	-0.399409	P3H4	-	exon				CpG_Shore_2kb_Upstream
chr11	557576	5.97121	0.00939905	0.887347	-0.318515	LMNTD2	-	exon				CpG_Shore_2kb_Downstream	CpG_Shelf_2-4kb_Upstream	promoter_+_strand	LMNTD2-AS1
chr8	100847759	5.97101	0.00939996	0.887347	-0.704036
chr10	133030270	5.97005	0.00940418	0.887347	-0.820169						CpG: 25	CpG_Shore_2kb_Upstream
chr11	126435047	5.96756	0.00941522	0.887347	-0.700387	KIRREL3	-
chr16	85602715	5.96283	0.00943627	0.887347	-0.429004
chr12	121823236	5.96005	0.00944863	0.887347	-0.278119	SETD1B	+	exon			CpG: 29	CpG_Shore_2kb_Upstream
chr5	10534387	5.95732	0.00946083	0.887347	-0.759646
chr9	2070463	5.9566	0.00946405	0.887347	-0.430659	SMARCA2	+	exon
chr1	24321405	5.95608	0.00946639	0.887347	-0.580189	GRHL3	+					CpG_Shore_2kb_Upstream
chr3	17142335	5.95491	0.00947161	0.887347	-1.02919	ENSG00000285731	+
chr20	3816819	5.95282	0.00948093	0.887347	-0.502212	ENSG00000274949	+						CpG_Shelf_2-4kb_Upstream
chr3	57126277	5.95142	0.00948723	0.887347	-0.403815	IL17RD	-
chr18	55300792	5.95046	0.00949154	0.887347	-0.371433	TCF4	-
chr12	117646621	5.94998	0.0094937	0.887347	-0.467001	KSR2	-
chr14	93762259	-5.94575	0.00951268	0.887347	1.05035	PRIMA1	-
chr14	99517242	5.94152	0.00953175	0.887347	-0.772992	CCDC85C	-
chr19	7857979	5.94016	0.00953785	0.887347	-1.70072	EVI5L	+	exon					CpG_Shelf_2-4kb_Upstream
chr3	53170916	5.93993	0.00953892	0.887347	-0.945977	PRKCD	+
chr10	73987	5.93581	0.00955755	0.887347	-0.596922			exon	5'UTR		CpG: 57		CpG_Shelf_2-4kb_Upstream
chr7	157300135	5.9351	0.00956073	0.887347	-0.943137						CpG: 64
chr10	68599495	5.93191	0.00957519	0.887347	-0.352346	TET1	+
chr7	154183731	-5.93078	0.00958034	0.887347	0.615361	DPP6	+
chr17	82867891	5.92939	0.00958665	0.887347	-0.35725	TBCD	+	exon					CpG_Shelf_2-4kb_Upstream
chr7	104231349	5.92464	0.00960827	0.887347	-0.20616
chr2	106534695	5.92201	0.00962023	0.887347	-0.571066	ENSG00000231505	-
chr11	72636157	5.91971	0.00963075	0.887347	-1.17255	PDE2A	-
chr4	151049152	5.91917	0.00963321	0.887347	-0.41837
chr17	75877420	5.91889	0.00963452	0.887347	-0.840406	ENSG00000267801	+	exon				CpG_Shore_2kb_Upstream	CpG_Shelf_2-4kb_Downstream
chr6	107492483	5.91745	0.00964112	0.887347	-1.33223	SOBP	+					CpG_Shore_2kb_Downstream	CpG_Shelf_2-4kb_Downstream
chr16	85608726	5.91506	0.00965203	0.887347	-0.999639							CpG_Shore_2kb_Upstream	CpG_Shelf_2-4kb_Upstream
chr4	144809963	5.915	0.00965233	0.887347	-0.281868	ENSG00000285713	-
chr16	84867967	5.91086	0.00967131	0.887347	-0.792207	CRISPLD2	+
chr6	41603294	5.90902	0.00967979	0.887347	-1.00976
chr17	75128542	5.90504	0.00969814	0.887347	-0.220835	ARMC7	+					CpG_Shore_2kb_Upstream	CpG_Shelf_2-4kb_Upstream
chr6	37517090	5.90069	0.00971822	0.887347	-0.336574	LINC02520	+
chr2	20164100	5.89889	0.00972654	0.887347	-0.581993
chr7	4800460	5.89341	0.00975195	0.887347	-1.33981	RADIL	-
chr16	659834	5.89311	0.00975339	0.887347	-0.416996	WDR90	+					CpG_Shore_2kb_Upstream	CpG_Shelf_2-4kb_Upstream
chr10	128047401	5.89211	0.00975803	0.887347	-0.361768			exon						promoter_+_strand	PTPRE
chr16	85626973	-5.89198	0.00975863	0.887347	1.04157	GSE1	+					CpG_Shore_2kb_Downstream
chr16	88526951	5.87641	0.0098314	0.887347	-0.422415	ZFPM1-AS1	-						CpG_Shelf_2-4kb_Downstream
chr22	29721314	5.87488	0.00983859	0.887347	-0.1927	CABP7	+					CpG_Shore_2kb_Downstream
chr8	37788067	5.86415	0.00988922	0.887347	-1.20385
chr1	20029620	5.86093	0.00990444	0.887347	-0.196954
chr3	125520568	5.85987	0.00990946	0.887347	-0.351458							CpG_Shore_2kb_Downstream		promoter_-_strand	SNX4
chr19	1132861	5.85902	0.00991351	0.887347	-0.16655	SBNO2	-
chr5	180072601	5.85851	0.00991595	0.887347	-0.67989							CpG_Shore_2kb_Downstream		promoter_-_strand	RNF130
chr4	3822423	5.85495	0.00993285	0.887347	-0.617623
chr10	133358213	5.85443	0.00993532	0.887347	-0.0982518						CpG: 117			promoter_-_strand	FUOM
chr19	29724828	5.85404	0.00993721	0.887347	-0.360841							CpG_Shore_2kb_Downstream
chr12	80990480	5.85315	0.00994142	0.887347	-0.69233
chr4	15655944	5.85256	0.00994428	0.887347	-0.141158						CpG: 145			promoter_-_strand	FBXL5
chr6	167447624	5.85111	0.00995115	0.887347	-0.446739
chr14	101151947	5.8492	0.00996027	0.887347	-0.968182	ENSG00000286551	-	exon
chr11	64041406	5.84887	0.00996186	0.887347	-0.20516	FLRT1	+
chr2	101696496	5.84293	0.00999032	0.887347	-1.59074							CpG_Shore_2kb_Upstream
chr12	119009315	-5.83731	0.0100173	0.887347	1.22622	SRRM4	+
chr5	180366392	5.83383	0.0100341	0.887347	-1.12376
chr19	2815389	5.8318	0.0100439	0.887347	-0.100086	THOP1	+	exon		3'UTR			CpG_Shelf_2-4kb_Downstream
chr17	41656069	5.83123	0.0100466	0.887347	-1.14922
chr10	113108689	5.82391	0.0100821	0.887347	-0.483185	TCF7L2	+
chr7	150944305	5.8183	0.0101094	0.887347	-0.870095								CpG_Shelf_2-4kb_Upstream
chr1	935755	5.8179	0.0101113	0.887347	-0.333855	SAMD11	+				CpG: 27	CpG_Shore_2kb_Upstream
chr16	86788980	5.80917	0.010154	0.887347	-0.927898
chr1	39672587	-5.80887	0.0101554	0.887347	0.849073							CpG_Shore_2kb_Downstream		promoter_-_strand	NT5C1A
chr2	20445418	5.80736	0.0101628	0.887347	-0.404781							CpG_Shore_2kb_Upstream
chr6	137001806	5.80643	0.0101674	0.887347	-2.11547	IL20RA	-	exon
chr1	53503677	5.79536	0.0102219	0.887347	-0.439101
chr11	63835268	5.79225	0.0102373	0.887347	-1.15119								CpG_Shelf_2-4kb_Upstream	promoter_-_strand	ATP5MGP1
chr3	183479945	5.79133	0.0102419	0.887347	-0.520047
chr16	87853045	5.7875	0.0102609	0.887347	-0.341503	SLC7A5	-
chr17	77494878	5.78671	0.0102648	0.887347	-0.305574	SEPTIN9	+
chr16	68386831	5.78559	0.0102704	0.887347	-1.01206	SMPD3	-
chr22	43111825	5.78485	0.010274	0.887347	-2.31754	BIK	+					CpG_Shore_2kb_Downstream
chr16	4117283	5.78271	0.0102847	0.887347	-1.52329							CpG_Shore_2kb_Downstream		promoter_-_strand	ADCY9
chr10	121341460	-5.77804	0.010308	0.887347	0.686067
chr9	129320374	5.77656	0.0103154	0.887347	-1.36569							CpG_Shore_2kb_Upstream		promoter_+_strand	LINC02913
chr6	151110475	5.77415	0.0103275	0.887347	-0.74482	ENSG00000223598	-
chr16	180175	5.77412	0.0103276	0.887347	-0.746368							CpG_Shore_2kb_Upstream	CpG_Shelf_2-4kb_Downstream	promoter_+_strand	HBQ1
chr10	101310447	5.76647	0.010366	0.887347	-1.22786							CpG_Shore_2kb_Upstream		promoter_+_strand	ENSG00000225208
chr19	17975178	5.76634	0.0103667	0.887347	-0.473239	KCNN1	+	exon				CpG_Shore_2kb_Downstream
chr20	25540797	5.76335	0.0103817	0.887347	-0.766718	NINL	-
chr16	85436667	5.75696	0.010414	0.887347	-0.297179
chr19	1284183	5.75489	0.0104246	0.887347	-0.889456							CpG_Shore_2kb_Upstream	CpG_Shelf_2-4kb_Upstream
chr10	1243659	5.75202	0.0104391	0.887347	-0.659884	ADARB2	-					CpG_Shore_2kb_Downstream
chr12	82910723	5.7512	0.0104433	0.887347	-0.474546	TMTC2	+
chr10	118019752	5.74956	0.0104516	0.887347	-0.600069	RAB11FIP2	-
chr16	85561720	5.74915	0.0104537	0.887347	-0.528237
chr15	66617853	5.74691	0.0104651	0.887347	-0.80033	LINC01169	+
chr5	179336663	5.74607	0.0104694	0.887347	-1.17866	ADAMTS2	-
chr13	99445164	5.74269	0.0104867	0.887347	-0.591142
chr17	49570641	5.74011	0.0104999	0.887347	-0.673194	NGFR-AS1	-					CpG_Shore_2kb_Downstream	CpG_Shelf_2-4kb_Downstream
chr11	133589169	5.73964	0.0105023	0.887347	-1.36102
chr1	38783962	5.73428	0.0105297	0.887347	-1.35774	ENSG00000284632	-
chr17	48038314	5.734	0.0105312	0.887347	-0.747833							CpG_Shore_2kb_Downstream		promoter_-_strand	COPZ2
chr17	81741293	5.733	0.0105363	0.887347	-1.4992							CpG_Shore_2kb_Downstream
chr22	44350447	5.72966	0.0105535	0.887347	-0.588549
chr11	133991779	5.72952	0.0105542	0.887347	-1.03238
chr1	22212891	5.72777	0.0105633	0.887347	-0.500549
chr17	81127777	5.72759	0.0105642	0.887347	-1.24593	AATK	-					CpG_Shore_2kb_Upstream
chr3	64444255	5.72715	0.0105665	0.887347	-0.914398	PRICKLE2	-					CpG_Shore_2kb_Upstream
chr17	49093217	5.72661	0.0105693	0.887347	-0.94797
chr11	706787	-5.72412	0.0105821	0.887347	0.431982	EPS8L2	+	exon	5'UTR			CpG_Shore_2kb_Downstream
chr4	128601545	5.7229	0.0105884	0.887347	-0.304557									promoter_-_strand	ENSG00000248802
chr1	28512234	5.72274	0.0105893	0.887347	-0.28554	RCC1	+
chr19	5128454	5.7214	0.0105962	0.887347	-0.513803	KDM4B	+
chr11	1073524	5.71827	0.0106125	0.887347	-0.781983
chr17	62679939	5.71714	0.0106183	0.887347	-0.692551	ENSG00000279713	-	exon			CpG: 87
chr9	88077151	5.71102	0.0106501	0.887347	-0.74845						CpG: 74			promoter_-_strand	ENSG00000287750
chr18	48987924	5.70995	0.0106558	0.887347	-0.64095
chr17	73571792	5.70669	0.0106728	0.887347	-0.283872	SDK2	-
chr3	186256129	-5.70143	0.0107003	0.887347	0.591148	DGKG	-
chr22	36788210	5.70021	0.0107068	0.887347	-1.03724
chr9	129337306	-5.69998	0.0107079	0.887347	0.660325	LINC01503	+				CpG: 45
chr18	5540569	-5.69877	0.0107143	0.887347	0.942003	EPB41L3	-						CpG_Shelf_2-4kb_Upstream
chr15	92101815	5.6938	0.0107405	0.887347	-0.409843	SLCO3A1	+
chr12	57215437	5.69145	0.0107529	0.887347	-0.732444							CpG_Shore_2kb_Upstream
chr8	22147367	5.687	0.0107764	0.887347	-0.869537	LGI3	-	exon		3'UTR
chr1	1541287	5.68671	0.010778	0.887347	-0.366142						CpG: 154		CpG_Shelf_2-4kb_Downstream	promoter_-_strand	TMEM240
chr10	124389474	5.68453	0.0107895	0.887347	-0.365351						CpG: 61
chr17	48671883	-5.68386	0.0107931	0.887347	0.652439	LINC02086	+
chr8	143975850	5.68328	0.0107961	0.887347	-0.518115						CpG: 401			promoter_-_strand	PLEC
chr11	117830333	5.68026	0.0108122	0.887347	-0.829588	FXYD6-FXYD2	-
chr22	37070894	5.67999	0.0108136	0.887347	-0.433331	TMPRSS6	-					CpG_Shore_2kb_Downstream
chr1	145721084	5.67818	0.0108233	0.887347	-0.615683	CD160	+				CpG: 17
chr6	7109921	5.67325	0.0108496	0.887347	-1.09098	RREB1	+					CpG_Shore_2kb_Downstream
chr7	150976106	5.67095	0.0108619	0.887347	-0.42984	KCNH2	-					CpG_Shore_2kb_Upstream	CpG_Shelf_2-4kb_Upstream
chr21	43917330	5.67042	0.0108647	0.887347	-0.901963	AGPAT3	+
chr19	18302919	5.67019	0.0108659	0.887347	-0.916868
chr7	101021277	5.66971	0.0108685	0.887347	-0.688254	MUC17	+
chr3	167380098	-5.66882	0.0108733	0.887347	0.388912	ZBBX	-					CpG_Shore_2kb_Upstream
chr19	13092800	5.66724	0.0108817	0.887347	-1.1896	NFIX	+						CpG_Shelf_2-4kb_Upstream
chr9	114289429	5.66474	0.0108952	0.887347	-0.636	COL27A1	+
chr12	67762827	5.66047	0.0109181	0.887347	-0.866845
chr1	47813325	5.65871	0.0109276	0.887347	-0.31754	TRABD2B	-
chr5	17151394	5.65534	0.0109458	0.887347	-0.659822	BASP1-AS1	-
chr16	88854866	5.65336	0.0109565	0.887347	-0.263753	GALNS	-					CpG_Shore_2kb_Upstream
chr2	240998146	-5.65261	0.0109606	0.887347	0.683492							CpG_Shore_2kb_Upstream		promoter_+_strand	SNED1
chr5	55463174	5.64736	0.0109891	0.887347	-0.341847	PLPP1	-
chr10	19489089	-5.64524	0.0110006	0.887347	0.820674	MALRD1	+	exon						promoter_+_strand	HMGN1P20
chr7	152540768	5.64355	0.0110098	0.887347	-0.503755
chr16	30699543	5.64052	0.0110264	0.887347	-0.518405	SRCAP	+					CpG_Shore_2kb_Downstream		promoter_-_strand	ENSG00000261840
chr11	76670392	5.63913	0.0110339	0.887347	-0.324588	LRRC32	-					CpG_Shore_2kb_Upstream
chr20	46356887	5.63733	0.0110437	0.887347	-0.56984	SLC35C2	-
chr5	160321371	5.63011	0.0110834	0.887347	-1.19539
chr15	40106200	5.62903	0.0110893	0.887347	-0.976888	BMF	-						CpG_Shelf_2-4kb_Upstream
chr1	3352162	5.62626	0.0111046	0.887347	-0.391862	PRDM16	+
chr17	41967933	5.62528	0.0111099	0.887347	-0.839595	CNP	+	exon	5'UTR		CpG: 17	CpG_Shore_2kb_Upstream
chr2	120434687	5.62509	0.011111	0.887347	-1.26342
chr4	4875370	5.6245	0.0111142	0.887347	-0.866423								CpG_Shelf_2-4kb_Downstream
chr5	177101039	5.621	0.0111335	0.887347	-0.889298
chr21	43463651	5.61491	0.0111673	0.887347	-0.64863
chr16	85335664	-5.61158	0.0111858	0.887347	0.701142
chr3	64920167	5.60759	0.011208	0.887347	-0.825879	ADAMTS9-AS2	+
chr19	18672100	5.59869	0.0112578	0.887347	-0.341213								CpG_Shelf_2-4kb_Downstream
chr3	50124961	5.59164	0.0112974	0.887347	-1.20638	SEMA3F-AS1	-
chr20	32574544	5.59141	0.0112987	0.887347	-0.927416	NOL4L	-
chr11	83435032	5.58765	0.0113199	0.887347	-1.04973
chr4	140295599	5.58623	0.011328	0.887347	-1.02173	SCOC-AS1	-
chr9	129489725	5.58293	0.0113466	0.887347	-1.2626	LINC00963	+					CpG_Shore_2kb_Downstream
chr19	4981012	5.58222	0.0113506	0.887347	-0.735223	KDM4B	+
chr1	116571665	5.5816	0.0113542	0.887347	-0.353636							CpG_Shore_2kb_Downstream		promoter_-_strand	CD58
chr16	67663498	5.5767	0.011382	0.887347	-0.278763	ENKD1	-	exon				CpG_Shore_2kb_Downstream	CpG_Shelf_2-4kb_Upstream
chr10	128498910	5.56881	0.011427	0.887347	-0.923352							CpG_Shore_2kb_Upstream
chr16	9156074	5.5683	0.01143	0.887347	-0.589733
chr19	4911997	5.56747	0.0114347	0.887347	-0.00170986	UHRF1	+					CpG_Shore_2kb_Downstream
chr1	10636252	5.56488	0.0114495	0.887347	-0.77977							CpG_Shore_2kb_Upstream
chr19	35521243	5.56368	0.0114564	0.887347	-0.964865
chr17	43984594	5.55983	0.0114785	0.887347	-0.629858	PYY	-					CpG_Shore_2kb_Downstream
chr20	53833790	5.55707	0.0114944	0.887347	-0.822697
chr1	180229189	-5.54388	0.0115708	0.887347	0.594791						CpG: 471
chr5	171431461	-5.5424	0.0115794	0.887347	0.728309	FGF18	+
chr22	42857659	5.54105	0.0115872	0.887347	-0.978441						CpG: 125			promoter_-_strand	ARFGAP3
chr7	617868	5.54011	0.0115927	0.887347	-0.782068	PRKAR1B	-
chr20	57686171	5.53431	0.0116266	0.887347	-0.709871	PMEPA1	-
chr17	21119752	5.52866	0.0116597	0.887347	-0.816639
chr3	13850436	5.52776	0.011665	0.887347	-0.498173	WNT7A	-
chr7	128879611	5.52762	0.0116658	0.887347	-0.466886	KCP	-	exon
chr12	127620495	5.52753	0.0116664	0.887347	-0.445547
chr7	146992606	5.52645	0.0116727	0.887347	-1.09452	CNTNAP2	+
chr22	26445990	5.52355	0.0116897	0.887347	-1.10786
chr22	31093645	5.52254	0.0116957	0.887347	-0.377208	SMTN	+	exon
chr9	93094994	5.52211	0.0116983	0.887347	-0.898097	ENSG00000223446	-	exon				CpG_Shore_2kb_Upstream
chr9	66773247	5.52155	0.0117016	0.887347	-1.08617							CpG_Shore_2kb_Downstream
chr14	94110907	5.51768	0.0117244	0.887347	-0.785924	IFI27	+	exon	5'UTR
chr7	2387514	5.51657	0.011731	0.887347	-0.869998	KIF19BP	+
chr10	13390847	5.51649	0.0117314	0.887347	-1.13076									promoter_+_strand	ENSG00000286514
chr1	231163766	5.51318	0.0117511	0.887347	-0.531444	TRIM67	+	exon				CpG_Shore_2kb_Downstream	CpG_Shelf_2-4kb_Downstream
chr20	2165203	5.51199	0.0117581	0.887347	-0.578544
chr12	27023456	5.51004	0.0117697	0.887347	-0.492459	MED21	+					CpG_Shore_2kb_Downstream
chr15	70154563	5.50952	0.0117728	0.887347	-0.125988
chr10	132354683	5.50744	0.0117852	0.887347	-0.574378	LRRC27	+					CpG_Shore_2kb_Downstream	CpG_Shelf_2-4kb_Upstream
chr17	77466880	5.50507	0.0117993	0.887347	-0.270867	SEPTIN9	+
chr7	27024043	5.50361	0.011808	0.887347	-0.730023	TPM3P4	+
chr6	163868097	5.50212	0.0118169	0.887347	-0.831442
chr21	36547576	5.5019	0.0118182	0.887347	-0.375434	CLDN14	-
chr21	43718456	5.50083	0.0118246	0.887347	-0.463264						CpG: 171			promoter_+_strand	PDXK
chr19	18786209	5.49401	0.0118655	0.887347	-0.560899	COMP	-					CpG_Shore_2kb_Upstream	CpG_Shelf_2-4kb_Upstream
chr9	98317299	5.49246	0.0118748	0.887347	-0.482733	GABBR2	-
chr16	85717071	5.49161	0.0118799	0.887347	-1.03956	C16orf74	-
chr22	38865086	5.49132	0.0118817	0.887347	-0.473042	CBX6	-	exon		3'UTR		CpG_Shore_2kb_Upstream
chr1	102970736	5.48348	0.011929	0.887347	-0.670395	COL11A1	-
chr16	1180843	5.48197	0.0119382	0.887347	-0.266587	CACNA1H	+					CpG_Shore_2kb_Downstream	CpG_Shelf_2-4kb_Downstream
chr7	151722831	5.47498	0.0119806	0.887347	-0.712097	PRKAG2	-					CpG_Shore_2kb_Upstream
chr19	3802145	5.47276	0.0119941	0.887347	-0.418343							CpG_Shore_2kb_Downstream	CpG_Shelf_2-4kb_Upstream
chr12	52544703	5.46915	0.0120161	0.887347	-0.632684	KRT71	-	exon
chr8	143684165	5.46848	0.0120202	0.887347	-0.815614							CpG_Shore_2kb_Upstream		promoter_+_strand	ZNF707
chr10	70283763	-5.46544	0.0120388	0.887347	0.386439	NPFFR1	-	exon	5'UTR		CpG: 51
chr7	73841936	5.46098	0.0120662	0.887347	-0.475871	METTL27	-					CpG_Shore_2kb_Upstream
chr4	3499845	5.46011	0.0120715	0.887347	-0.482032							CpG_Shore_2kb_Upstream	CpG_Shelf_2-4kb_Upstream
chr7	1066184	5.45962	0.0120745	0.887347	-0.121616	C7orf50	-				CpG: 61
chr1	52498284	5.45506	0.0121026	0.887347	-0.365524	TUT4	-
chr2	202872576	5.45406	0.0121087	0.887347	-0.969819							CpG_Shore_2kb_Downstream		promoter_-_strand	ICA1L
chr19	865290	5.45394	0.0121095	0.887347	-0.674677							CpG_Shore_2kb_Upstream	CpG_Shelf_2-4kb_Upstream
chr7	129804647	5.45286	0.0121161	0.887347	-0.501565
chr22	50184666	5.4518	0.0121227	0.887347	-0.60766							CpG_Shore_2kb_Upstream
chr19	4233147	5.45174	0.0121231	0.887347	-0.720278	EBI3	+	exon
chr19	54114276	-5.44913	0.0121392	0.887347	0.697703	TFPT	-					CpG_Shore_2kb_Upstream
chr6	154541997	5.44609	0.012158	0.887347	-1.25965									promoter_+_strand	ENSG00000275419
chr19	4640833	5.44389	0.0121717	0.887347	-0.875652	TNFAIP8L1	+	exon				CpG_Shore_2kb_Downstream
chr5	43089120	5.44288	0.012178	0.887347	-0.306832
chr2	130757132	5.43798	0.0122085	0.887347	-0.312525	AMER3	+					CpG_Shore_2kb_Downstream
chr2	236643217	5.43443	0.0122306	0.887347	-0.46085
chr17	50102129	5.43184	0.0122468	0.887347	-0.182527	PDK2	+						CpG_Shelf_2-4kb_Upstream	promoter_-_strand	ENSG00000250282
chr6	57872010	5.42909	0.0122641	0.887347	-0.659205
chr16	85624865	-5.42436	0.0122938	0.887347	0.448491	GSE1	+					CpG_Shore_2kb_Upstream
chr20	3821463	-5.42432	0.0122941	0.887347	0.317137	AP5S1	+					CpG_Shore_2kb_Downstream
chr22	49370085	5.42398	0.0122962	0.887347	-0.816333							CpG_Shore_2kb_Downstream
chr16	87560521	5.42284	0.0123034	0.887347	-0.382898
chr10	97188356	5.4216	0.0123112	0.887347	-0.841596	ARHGAP19-SLIT1	-					CpG_Shore_2kb_Downstream
chr19	409929	5.42065	0.0123172	0.887347	-0.495983							CpG_Shore_2kb_Downstream	CpG_Shelf_2-4kb_Downstream	promoter_-_strand	C2CD4C
chr2	98281057	5.41232	0.0123699	0.887347	-0.920371	VWA3B	+
chr19	50717738	5.40797	0.0123975	0.887347	-0.263358	SHANK1	-					CpG_Shore_2kb_Upstream
chr17	82016358	5.40716	0.0124027	0.887347	-0.793657	ASPSCR1	+	exon
chr8	22785737	5.40622	0.0124087	0.887347	-0.937941	ENSG00000253125	+
chr2	96769810	5.40098	0.0124421	0.887347	-0.62585	CNNM4	+
chr17	77479452	5.399	0.0124548	0.887347	-0.792187	SEPTIN9	+
chr12	111265637	5.39775	0.0124627	0.887347	-0.963599	CUX2	+
chr3	9124421	5.3971	0.012467	0.887347	-0.883789	SRGAP3	-
chr6	21654595	5.39675	0.0124691	0.887347	-1.03447
chr6	153140096	5.39583	0.0124751	0.887347	-0.763938
chr14	95460865	5.39328	0.0124914	0.887347	-0.508074	SYNE3	-
chr13	22848689	-5.38922	0.0125176	0.887347	0.857722						CpG: 22
chr18	48987470	5.38677	0.0125334	0.887347	-0.455508
chr12	98517883	5.38287	0.0125585	0.887347	-0.675575	TMPO	+					CpG_Shore_2kb_Downstream
chr1	1534533	5.38279	0.0125591	0.887347	-0.88867	ATAD3A	+	exon		3'UTR		CpG_Shore_2kb_Upstream	CpG_Shelf_2-4kb_Upstream
chr20	34558368	5.38202	0.0125641	0.887347	-0.583122						CpG: 101	CpG_Shore_2kb_Upstream		promoter_+_strand	MAP1LC3A
chr17	76012814	-5.38146	0.0125677	0.887347	0.679922	EVPL	-						CpG_Shelf_2-4kb_Upstream
chr6	79525835	5.37782	0.0125913	0.887347	-0.996414	LCA5	-
chr22	42320627	-5.37479	0.012611	0.887347	0.635597
chr9	127971634	5.37446	0.0126131	0.887347	-0.848591	FAM102A	-
chr15	40489940	5.37185	0.0126301	0.887347	-0.755154	ENSG00000259536	+
chr1	54121406	5.36848	0.0126522	0.887347	-0.371421							CpG_Shore_2kb_Upstream
chr4	102010484	5.36177	0.0126961	0.887347	-0.66891	ENSG00000251309	-
chr4	7842569	5.36128	0.0126993	0.887347	-0.684733	AFAP1	-
chr1	44011511	5.358	0.0127209	0.887347	-0.810339	SLC6A9	-
chr8	143275911	5.35727	0.0127256	0.887347	-1.13023	GLI4	+	exon		3'UTR	CpG: 106		CpG_Shelf_2-4kb_Upstream
chr11	69438820	5.35304	0.0127536	0.887347	-0.441015	ENSG00000255606	-	exon
chr4	65593772	5.34995	0.012774	0.887347	-0.727807	EPHA5	-
chr19	11552201	5.34866	0.0127825	0.887347	-0.93197			exon		3'UTR			CpG_Shelf_2-4kb_Downstream
chr1	113232069	5.34826	0.0127851	0.887347	-0.761733
chr10	71443542	5.34426	0.0128117	0.887347	-0.498522	CDH23	+
chr4	108144079	5.34386	0.0128144	0.887347	-1.28717	LEF1	-
chr17	81444962	5.3422	0.0128254	0.887347	-0.441238	BAHCC1	+					CpG_Shore_2kb_Upstream	CpG_Shelf_2-4kb_Upstream
chr16	4306746	-5.34218	0.0128255	0.887347	0.819932							CpG_Shore_2kb_Upstream
chr1	153783929	5.34011	0.0128393	0.887347	-0.616596							CpG_Shore_2kb_Downstream
chr9	124105265	5.33688	0.0128608	0.887347	-0.916536
chr2	239035517	-5.32983	0.012908	0.887347	0.379004
chr11	3163109	5.32881	0.0129148	0.887347	-0.958998	OSBPL5	-					CpG_Shore_2kb_Upstream	CpG_Shelf_2-4kb_Downstream
chr7	155531200	5.32733	0.0129248	0.887347	-0.404888	CNPY1	-					CpG_Shore_2kb_Upstream
chr14	103628487	5.32253	0.0129571	0.887347	-0.633161	ENSG00000256500	+				CpG: 188			promoter_+_strand	KLC1
chr9	129023128	-5.32006	0.0129738	0.887347	0.9249	SH3GLB2	-
chr14	101299965	5.31875	0.0129826	0.887347	-0.330182
chr19	417156	5.31774	0.0129894	0.887347	-0.266467	SHC2	-	exon		3'UTR		CpG_Shore_2kb_Upstream
chr7	148521388	5.31632	0.012999	0.887347	-0.500839
chr12	6158869	5.31523	0.0130064	0.887347	-0.582256	ENSG00000255775	-
chr3	120263826	5.31273	0.0130233	0.887347	-1.07357	GPR156	-
chr10	93079048	5.30917	0.0130476	0.887347	-0.454138								CpG_Shelf_2-4kb_Downstream
chr16	2133961	5.30791	0.0130561	0.887347	-0.514713	PKD1	-					CpG_Shore_2kb_Upstream
chr1	22133831	5.30541	0.0130732	0.887347	-1.03218	WNT4	-
chr16	30539622	5.30339	0.0130869	0.887347	-1.41297
chr22	20313982	5.30337	0.0130871	0.887347	-0.359982
chr9	135726096	5.30237	0.0130939	0.887347	-0.587714	KCNT1	+
chr16	21558066	5.29994	0.0131105	0.887347	-0.985816
chr18	76818410	5.29727	0.0131288	0.887347	-1.05424	ZNF236-DT	-						CpG_Shelf_2-4kb_Upstream
chr10	126687380	5.29672	0.0131326	0.887347	-0.322529
chr18	48940923	5.29563	0.0131401	0.887347	-0.493643	SMAD7	-
chr2	5672652	5.29001	0.0131787	0.887347	-0.632616	LINC01248	-					CpG_Shore_2kb_Upstream
chr17	73429628	5.28286	0.0132281	0.887347	-0.608445	SDK2	-
chr15	74350900	5.28263	0.0132297	0.887347	-0.958822	PPIAP46	+	exon
chr16	46929854	-5.28249	0.0132307	0.887347	0.606224	GPT2	+	exon		3'UTR
chr22	21443872	5.27774	0.0132637	0.887347	-0.59821	HIC2	+						CpG_Shelf_2-4kb_Upstream
chr4	7911301	-5.27373	0.0132916	0.887347	0.343042	AFAP1	-
chr5	1118455	5.2718	0.013305	0.887347	-0.397267
chr16	86489169	5.26935	0.0133221	0.887347	-0.531071	FENDRR	-	exon
chr15	99995037	-5.26801	0.0133315	0.887347	0.532672	ADAMTS17	-					CpG_Shore_2kb_Downstream	CpG_Shelf_2-4kb_Upstream
chr9	124257691	5.26606	0.0133452	0.887347	-0.454067	NEK6	+	exon	5'UTR			CpG_Shore_2kb_Upstream
chr21	45471665	5.26423	0.013358	0.887347	-0.375168	COL18A1	+					CpG_Shore_2kb_Downstream	CpG_Shelf_2-4kb_Upstream
chr22	36380132	5.26282	0.0133679	0.887347	-0.425965	MYH9	-
chr9	129341355	5.26246	0.0133704	0.887347	-0.840229	LINC01503	+	exon
chr1	10648127	5.25655	0.013412	0.887347	-0.812579	ENSG00000272078	+	exon				CpG_Shore_2kb_Downstream
chr17	78365158	-5.25622	0.0134143	0.887347	1.11272
chr2	6772517	5.25329	0.013435	0.887347	-0.612109
chr5	1134090	5.24229	0.0135131	0.887347	-0.984429
chr16	85436399	5.2419	0.0135158	0.887347	-0.111756
chr19	7902842	5.23841	0.0135407	0.887347	-0.917846	ENSG00000214248	-	exon				CpG_Shore_2kb_Upstream	CpG_Shelf_2-4kb_Downstream
chr9	135992480	5.23711	0.01355	0.887347	-0.210244								CpG_Shelf_2-4kb_Downstream
chr1	40316923	5.23676	0.0135525	0.887347	-0.163096	COL9A2	-				CpG: 98	CpG_Shore_2kb_Downstream
chr1	46519919	5.23541	0.0135621	0.887347	-0.585842
chr2	218002749	5.23318	0.0135781	0.887347	-0.59039	TNS1	-
chr13	40485738	5.22689	0.0136232	0.887347	-0.349806	ENSG00000288542	-
chr1	234231310	5.2239	0.0136448	0.887347	-0.531033	SLC35F3	+					CpG_Shore_2kb_Upstream
chr20	38864992	5.22388	0.0136449	0.887347	-0.796599	PPP1R16B	+
chr19	7952849	5.21873	0.0136822	0.887347	-1.16027
chr22	48434207	5.21868	0.0136825	0.887347	-0.723172
chr15	40445513	5.21816	0.0136863	0.887347	-0.809898	BAHD1	+						CpG_Shelf_2-4kb_Downstream
chr10	129443650	5.21434	0.013714	0.887347	-0.812971
chr15	69531522	5.21401	0.0137164	0.887347	-0.35336	DRAIC	+
chr1	27514102	5.21339	0.0137208	0.887347	-0.410939
chr16	4264247	5.21307	0.0137232	0.887347	-1.00015	TFAP4	-	exon					CpG_Shelf_2-4kb_Downstream
chr2	10911352	5.2129	0.0137244	0.887347	-0.561556							CpG_Shore_2kb_Upstream	CpG_Shelf_2-4kb_Upstream	promoter_+_strand	KCNF1
chr17	78140216	5.2111	0.0137375	0.887347	-0.626042	TMC8	+					CpG_Shore_2kb_Upstream
chr21	41772334	5.20747	0.013764	0.887347	-0.630694
chr6	39792867	5.20165	0.0138065	0.887347	-0.892496							CpG_Shore_2kb_Downstream		promoter_+_strand	DAAM2
chr20	24617517	5.2002	0.0138171	0.887347	-0.367464	SYNDIG1	+
chr9	130199042	-5.19473	0.0138573	0.887347	0.572183	NCS1	+
chr15	31434803	5.19368	0.013865	0.887347	-0.399614
chr3	128428539	5.18965	0.0138947	0.887347	-1.27681							CpG_Shore_2kb_Downstream
chr21	22575353	5.18698	0.0139145	0.887347	-1.06375
chr15	40443601	5.18556	0.013925	0.887347	-0.928336	BAHD1	+					CpG_Shore_2kb_Downstream
chr2	121811014	5.18342	0.0139409	0.887347	-0.731669
chr7	127807537	5.18156	0.0139546	0.887347	-0.487961	SND1	+	exon
chr12	124727433	5.17258	0.0140216	0.887347	-0.265578
chr17	50147230	5.17016	0.0140396	0.887347	-0.995474	PPP1R9B	-					CpG_Shore_2kb_Upstream
chr3	127804200	5.16782	0.0140571	0.887347	-0.883275	MGLL	-
chr17	76476829	5.16777	0.0140576	0.887347	-1.44973	RHBDF2	-	exon
chr16	58733190	5.16429	0.0140837	0.887347	-0.306275	GOT2	-					CpG_Shore_2kb_Upstream
chr3	170425507	5.16346	0.0140899	0.887347	-0.632427	CLDN11	+
chr17	50036852	5.1612	0.0141069	0.887347	-0.540968
chr1	1142964	5.16003	0.0141157	0.887347	-1.12607	LINC01342	+	exon
chr8	125427267	5.15878	0.0141252	0.887347	-0.231063							CpG_Shore_2kb_Upstream
chr20	32745437	5.15771	0.0141332	0.887347	-1.29201							CpG_Shore_2kb_Downstream
chr10	91299179	5.15684	0.0141398	0.887347	-0.360326
chr9	108762054	5.15377	0.0141631	0.887347	-0.346381
chr22	28792931	5.15244	0.0141731	0.887347	-0.59784
chr9	129752664	5.15056	0.0141874	0.887347	-0.452158	PTGES	-
chr15	40911458	5.14887	0.0142002	0.887347	-0.237208
chr5	521996	5.14865	0.0142019	0.887347	-1.07266	SLC9A3	-					CpG_Shore_2kb_Upstream
chr2	85307231	5.14831	0.0142045	0.887347	-0.356478	TCF7L1	+
chr22	25462827	5.14436	0.0142345	0.887347	-0.522758	CRYBB2P1	+
chr14	102055540	-5.14275	0.0142467	0.887347	0.403338	ENSG00000258959	-	exon		3'UTR
chr1	205441881	5.14133	0.0142576	0.887347	-0.26958	BLACAT1	-
chr15	62990049	5.14107	0.0142596	0.887347	-0.682525
chr11	67419027	5.13079	0.0143384	0.887347	-1.06398	CARNS1	+	exon				CpG_Shore_2kb_Upstream	CpG_Shelf_2-4kb_Downstream
chr9	134493061	5.13071	0.014339	0.887347	-1.47153
chr11	2249673	5.13012	0.0143436	0.887347	-0.521692
chr2	47264621	5.12999	0.0143446	0.887347	-0.705976	EPCAM-DT	-
chr16	895172	5.12964	0.0143473	0.887347	-0.70359	LMF1	-
chr2	10757901	5.12901	0.0143521	0.887347	-0.880955	ATP6V1C2	+
chr3	195889890	-5.12715	0.0143664	0.887347	0.368052	TNK2	-						CpG_Shelf_2-4kb_Downstream
chr7	93591735	5.12649	0.0143715	0.887347	-0.637193			exon	5'UTR
chr21	42310860	-5.1237	0.0143931	0.887347	0.27525
chr11	126105045	5.12264	0.0144013	0.887347	-1.0726
chr9	136328093	5.1224	0.0144031	0.887347	-0.731651	GPSM1	+					CpG_Shore_2kb_Downstream		promoter_-_strand	DKFZP434A062
chr1	175146651	5.12027	0.0144197	0.887347	-0.686261	TNN	+
chr19	5826606	5.12024	0.0144198	0.887347	-0.72531	NRTN	+					CpG_Shore_2kb_Upstream	CpG_Shelf_2-4kb_Upstream
chr3	196666716	5.11831	0.0144349	0.887347	-0.44191
chr9	136011697	5.11749	0.0144412	0.887347	-0.360352	NACC2	-	exon			CpG: 69
chr20	47315817	5.11096	0.014492	0.887347	-0.631591	ZMYND8	-
chr1	3074881	5.10832	0.0145126	0.887347	-0.705925	PRDM16	+					CpG_Shore_2kb_Downstream	CpG_Shelf_2-4kb_Downstream
chr5	10248993	5.10801	0.0145151	0.887347	-0.679071	ENSG00000248968	+					CpG_Shore_2kb_Upstream
chr12	12010698	5.10783	0.0145165	0.887347	-0.670929
chr4	6326801	5.10726	0.0145209	0.887347	-0.785315	PPP2R2C	-
chr7	148502063	-5.10677	0.0145247	0.887347	0.779201	ENSG00000283504	-
chr5	523009	-5.1057	0.0145331	0.887347	0.257959	SLC9A3	-					CpG_Shore_2kb_Upstream
chr7	98230611	-5.09766	0.0145963	0.887347	0.586917	TECPR1	-
chr17	81488936	5.09559	0.0146126	0.887347	-0.75581							CpG_Shore_2kb_Downstream
chr12	113514941	5.09316	0.0146318	0.887347	-0.52864
chr19	29506138	5.09184	0.0146422	0.887347	-0.342226	ENSG00000266248	-
chr1	3543813	5.08918	0.0146633	0.887347	-0.460207	MEGF6	-					CpG_Shore_2kb_Downstream
chr11	66127283	-5.08823	0.0146708	0.887347	0.840503	PACS1	+
chr5	36662726	5.08532	0.0146939	0.887347	-0.415371	SLC1A3	+
chr18	45836414	5.07376	0.014786	0.887347	-1.51785	SIGLEC15	+					CpG_Shore_2kb_Upstream
chr17	81303820	5.07306	0.0147917	0.887347	-0.402773	LINC00482	-	exon
chr2	64640372	5.07305	0.0147917	0.887347	-0.46977	SERTAD2	-
chr21	34820186	5.07299	0.0147922	0.887347	-1.04923	RUNX1	-
chr9	113222885	5.06974	0.0148183	0.887347	-0.572239	SLC31A1	+					CpG_Shore_2kb_Downstream
chr9	134134778	5.06671	0.0148427	0.887347	-0.391976	WDR5-DT	-					CpG_Shore_2kb_Upstream
chr18	40426275	5.06513	0.0148553	0.887347	-0.818294
chr11	75301784	5.06414	0.0148634	0.887347	-0.724923	ARRB1	-
chr16	4373341	5.06303	0.0148723	0.887347	-0.891682	CORO7-PAM16	-					CpG_Shore_2kb_Downstream
chr18	77165867	5.06048	0.0148929	0.887347	-1.04756
chr2	196069091	-5.05952	0.0149006	0.887347	0.483409							CpG_Shore_2kb_Downstream		promoter_-_strand	DNAH7
chr11	64299874	5.05411	0.0149445	0.887347	-0.508332	KCNK4	+	exon		3'UTR	CpG: 153			promoter_+_strand	CATSPERZ
chr2	10501224	5.05289	0.0149544	0.887347	-0.825053
chr16	49664006	5.05162	0.0149647	0.887347	-0.463463	ZNF423	-
chr2	99652619	5.05052	0.0149737	0.887347	-1.58335	AFF3	-
chr2	10029374	5.0497	0.0149804	0.887347	-0.636477
chr17	1123430	5.04837	0.0149912	0.887347	-0.22722	ABR	-					CpG_Shore_2kb_Upstream
chr22	17971887	5.047	0.0150024	0.887347	-0.46213	MICAL3	-
chr2	10814382	-5.04686	0.0150035	0.887347	0.715541	PDIA6	-					CpG_Shore_2kb_Downstream
chr19	45146322	5.04538	0.0150156	0.887347	-0.747219	PPP1R37	+	exon				CpG_Shore_2kb_Downstream
chr12	111664705	5.04414	0.0150257	0.887347	-0.439792	BRAP	-
chr13	111670177	5.04303	0.0150348	0.887347	-0.397841	ENSG00000204398	+					CpG_Shore_2kb_Downstream
chr19	1861183	-5.04114	0.0150503	0.887347	0.287043	KLF16	-					CpG_Shore_2kb_Upstream	CpG_Shelf_2-4kb_Downstream
chr13	112981987	5.03577	0.0150944	0.887347	-0.234554	MCF2L	+					CpG_Shore_2kb_Downstream	CpG_Shelf_2-4kb_Downstream
chr1	202164657	5.03272	0.0151195	0.887347	-0.435066
chr17	7349467	5.03256	0.0151208	0.887347	-0.791896	ACAP1	+	exon				CpG_Shore_2kb_Upstream
chr22	40028913	-5.0299	0.0151428	0.887347	1.12866	FAM83F	+
chr19	3404685	5.02921	0.0151485	0.887347	-0.539272	NFIC	+				CpG: 51
chr1	162561016	5.02795	0.0151589	0.887347	-0.404789	UAP1-DT	-	exon				CpG_Shore_2kb_Upstream		promoter_+_strand	UAP1
chr19	35935623	5.02554	0.0151789	0.887347	-0.710592			exon	5'UTR			CpG_Shore_2kb_Upstream	CpG_Shelf_2-4kb_Upstream	promoter_+_strand	LRFN3
chr9	136628270	5.02418	0.0151901	0.887347	-0.865238
chr1	159855219	5.02413	0.0151906	0.887347	-0.500618	VSIG8	-	exon				CpG_Shore_2kb_Downstream		promoter_-_strand	SNHG28
chr20	17530548	5.02236	0.0152053	0.887347	-1.59902	BFSP1	-					CpG_Shore_2kb_Upstream
chr16	30557390	5.02094	0.015217	0.887347	-1.12255	ZNF764	-					CpG_Shore_2kb_Upstream	CpG_Shelf_2-4kb_Upstream
chr10	21318612	-5.02065	0.0152195	0.887347	0.646868
chr19	39144453	-5.0196	0.0152282	0.887347	0.272501	PAK4	+
chr12	6377211	5.01707	0.0152493	0.887347	-0.626528			exon
chr7	141511578	5.01693	0.0152504	0.887347	-1.60557	AGK-DT	-
chr9	129627200	5.01303	0.015283	0.887347	-0.304866	NTMT1	+					CpG_Shore_2kb_Downstream
chr10	49610824	5.0116	0.015295	0.887347	-0.594796	SLC18A3	+	exon			CpG: 256	CpG_Shore_2kb_Downstream	CpG_Shelf_2-4kb_Upstream
chr7	32298084	5.00996	0.0153087	0.887347	-0.91089							CpG_Shore_2kb_Upstream
chr2	241770521	5.0095	0.0153126	0.887347	-0.322524							CpG_Shore_2kb_Upstream
chr9	129282499	5.00644	0.0153382	0.887347	-0.618004	ENSG00000224307	+	exon
chr9	135992756	5.00059	0.0153874	0.887347	-0.500145								CpG_Shelf_2-4kb_Downstream
chr5	180803958	5.0002	0.0153907	0.887347	-0.823823	MGAT1	-					CpG_Shore_2kb_Downstream
chr5	138938427	4.99971	0.0153949	0.887347	-0.843776
chr21	45012556	-4.99689	0.0154187	0.887347	0.802856
chr20	62860740	4.9967	0.0154204	0.887347	-0.396326	TCFL5	-					CpG_Shore_2kb_Upstream
chr11	46366224	-4.99418	0.0154416	0.887347	0.748865	DGKZ	+					CpG_Shore_2kb_Upstream
chr10	101646525	4.99394	0.0154437	0.887347	-0.269335	FBXW4	-
chr17	81127780	4.99264	0.0154547	0.887347	-0.878373	AATK	-					CpG_Shore_2kb_Upstream
chr2	53792195	4.99168	0.0154629	0.887347	-0.600868	ERLEC1	+
chr10	60733719	4.98974	0.0154794	0.887347	-0.664472							CpG_Shore_2kb_Downstream		promoter_+_strand	ANK3-DT
chr9	110127537	4.98966	0.01548	0.887347	-0.533285
chr11	448957	4.98937	0.0154825	0.887347	-0.477845							CpG_Shore_2kb_Upstream
chr20	59453077	4.9878	0.0154958	0.887347	-0.807984
chr3	71620943	4.98383	0.0155297	0.887347	-0.592695	ENSG00000277855	+
chr19	5882043	4.98268	0.0155395	0.887347	-0.83856	ENSG00000267740	-
chr2	96090257	4.98155	0.0155492	0.887347	-0.333484
chr9	131289958	4.9812	0.0155522	0.887347	-0.73835	PLPP7	+	exon	5'UTR
chr2	9808877	4.97485	0.0156066	0.887347	-0.873122
chr1	11674549	4.97415	0.0156126	0.887347	-0.448102	MAD2L2	-	exon		3'UTR
chr8	43092955	4.97241	0.0156276	0.887347	-0.279395							CpG_Shore_2kb_Upstream		promoter_+_strand	POMK
chr15	53197822	4.97191	0.0156319	0.887347	-0.631894
chr19	33532131	4.97099	0.0156398	0.887347	-0.78834
chr11	64567841	4.9694	0.0156535	0.887347	-0.799572	SLC22A11	+					CpG_Shore_2kb_Upstream
chr14	89352545	4.96889	0.0156579	0.887347	-1.55203	ENSG00000258752	+
chr19	34365997	-4.96693	0.0156749	0.887347	0.653764	GPI	+	exon			CpG: 85
chr8	40114742	4.96656	0.015678	0.887347	-0.391433	LINC02866	+	exon
chr1	16987091	4.96421	0.0156984	0.887347	-0.524577	ATP13A2	-	exon
chr10	133274903	4.96345	0.0157049	0.887347	-1.21907	ADAM8	-	exon				CpG_Shore_2kb_Upstream
chr11	415493	4.96286	0.01571	0.887347	-1.01343	SIGIRR	-					CpG_Shore_2kb_Upstream
chr16	4615919	4.96188	0.0157186	0.887347	-0.171576						CpG: 242
chr10	5587717	4.96184	0.0157189	0.887347	-1.32479
chr5	34038539	4.9597	0.0157375	0.887347	-0.53758	C1QTNF3	-
chr21	44550560	4.95896	0.0157439	0.887347	-0.22252	KRTAP10-2	-	exon		3'UTR
chr16	84725441	4.95818	0.0157507	0.887347	-0.641153	USP10	+
chr19	46813392	4.9575	0.0157566	0.887347	-0.669989
chr16	11601043	4.95558	0.0157733	0.887347	-0.597014	LITAF	-
chr17	1470634	4.95443	0.0157833	0.887347	-0.478559	MYO1C	-	exon				CpG_Shore_2kb_Upstream
chr17	48592669	4.95292	0.0157965	0.887347	-0.79761	HOXB5	-					CpG_Shore_2kb_Upstream	CpG_Shelf_2-4kb_Upstream
chr16	10385721	4.94882	0.0158324	0.887347	-0.666599							CpG_Shore_2kb_Upstream		promoter_+_strand	ATF7IP2
chr1	53410381	4.94764	0.0158427	0.887347	-0.735234
chr1	6451226	4.94302	0.0158833	0.887347	-0.289124	ESPN	+					CpG_Shore_2kb_Upstream	CpG_Shelf_2-4kb_Upstream
chr6	11241807	4.94267	0.0158863	0.887347	-0.297501	ENSG00000247925	+
chr3	63993700	4.9397	0.0159124	0.887347	-0.817608	ATXN7	+
chr17	8109663	4.93876	0.0159207	0.887347	-0.469768	ALOXE3	-					CpG_Shore_2kb_Upstream
chr1	245606422	-4.93205	0.01598	0.887347	0.729613	KIF26B	+
chr14	61554009	4.93046	0.0159941	0.887347	-0.364949	ENSG00000258989	+
chr1	15176488	4.92989	0.0159992	0.887347	-0.670915	TMEM51	+
chr19	17339594	4.92865	0.0160102	0.887347	-0.29363	GTPBP3	+	exon		3'UTR		CpG_Shore_2kb_Downstream
chr9	134323651	4.92184	0.0160708	0.887347	-0.941699							CpG_Shore_2kb_Upstream
chr2	241674368	-4.92039	0.0160838	0.887347	0.720821								CpG_Shelf_2-4kb_Upstream
chr7	47303382	4.91859	0.0160999	0.887347	-1.08382	TNS3	-	exon
chr11	6390773	4.91768	0.0161081	0.887347	-0.495934	SMPD1	+	exon				CpG_Shore_2kb_Downstream
chr12	109734795	4.9164	0.0161195	0.887347	-0.749106	FAM222A	+	exon	5'UTR
chr21	45019429	4.91636	0.0161198	0.887347	-1.74561							CpG_Shore_2kb_Downstream
chr1	1304668	4.91617	0.0161216	0.887347	-0.309142	ACAP3	-	exon					CpG_Shelf_2-4kb_Upstream
chr14	93592266	4.913	0.01615	0.887347	-0.785166	UNC79	+
chr3	40615307	4.91171	0.0161616	0.887347	-0.883102							CpG_Shore_2kb_Upstream
chr8	31077384	4.91014	0.0161757	0.887347	-0.457528	WRN	+
chr22	40754033	4.90963	0.0161803	0.887347	-1.03515
chr16	54817622	-4.90955	0.0161811	0.887347	0.331396
chr7	5174628	4.90485	0.0162234	0.887347	-1.55544
chr6	46360429	4.90285	0.0162415	0.887347	-1.03656
chr2	25983154	-4.90174	0.0162515	0.887347	0.65299							CpG_Shore_2kb_Downstream		promoter_-_strand	KIF3C
chr14	101917306	4.90172	0.0162517	0.887347	-0.60842	PPP2R5C	+
chr7	99387165	4.90114	0.016257	0.887347	-0.490177	ARPC1B	+
chr12	57488857	-4.90054	0.0162625	0.887347	0.608619	MARS1	+	exon				CpG_Shore_2kb_Downstream
chr2	120546171	4.89937	0.016273	0.887347	-0.619588									promoter_-_strand	ENSG00000237614
chr16	87825529	4.89697	0.0162948	0.887347	-0.471552
chr19	19668152	4.89568	0.0163066	0.887347	-0.498924							CpG_Shore_2kb_Upstream		promoter_+_strand	ZNF101
chr16	27850953	4.89472	0.0163153	0.887347	-0.554909	GSG1L	-
chr17	77319389	4.89229	0.0163375	0.887347	-0.350606
chr5	431188	4.89177	0.0163422	0.887347	-0.757365	AHRR	+
chr11	392761	4.89165	0.0163433	0.887347	-0.287652							CpG_Shore_2kb_Upstream	CpG_Shelf_2-4kb_Upstream
chr7	111757735	4.89133	0.0163462	0.887347	-1.01134	ENSG00000287011	+	exon
chr11	70111572	4.89013	0.0163572	0.887347	-0.548189	ANO1	+
chr10	133334876	4.88979	0.0163603	0.887347	-0.721091	CALY	-				CpG: 200
chr1	9233296	4.88911	0.0163665	0.887347	-0.666285							CpG_Shore_2kb_Upstream
chr10	91890043	-4.88682	0.0163874	0.887347	0.408775								CpG_Shelf_2-4kb_Downstream
chr2	197621621	4.88556	0.016399	0.887347	-0.553062	RFTN2	-
chr19	44784477	4.88313	0.0164213	0.887347	-0.530656	CBLC	+
chr11	2122727	-4.88305	0.016422	0.887347	0.542849
chr1	205229886	4.88264	0.0164258	0.887347	-0.375664	TMCC2	+	exon				CpG_Shore_2kb_Downstream
chr1	29173229	4.88145	0.0164367	0.887347	-0.520791	SRSF4	-	exon
chr1	1072713	4.88089	0.0164419	0.887347	-0.665692	RNF223	-					CpG_Shore_2kb_Downstream	CpG_Shelf_2-4kb_Upstream
chr11	120503953	4.87985	0.0164514	0.887347	-0.50628
chr4	976338	4.87949	0.0164548	0.887347	-0.702541							CpG_Shore_2kb_Downstream
chr19	16417810	4.8749	0.0164971	0.887347	-0.307151	EPS15L1	-					CpG_Shore_2kb_Upstream
chr19	39083924	4.87441	0.0165016	0.887347	-0.439231			exon	5'UTR			CpG_Shore_2kb_Upstream		promoter_+_strand	ACP7
chr15	40069687	4.87107	0.0165325	0.887347	-0.591929	SRP14-DT	+
chr11	73388646	4.86811	0.0165599	0.887347	-0.648221	RELT	+
chr19	3964964	4.86757	0.0165649	0.887347	-1.11456	DAPK3	-	exon			CpG: 52		CpG_Shelf_2-4kb_Downstream
chr1	18191880	4.86741	0.0165664	0.887347	-0.583525	IGSF21	+
chr12	6388767	4.86719	0.0165685	0.887347	-0.352267	LTBR	+
chr4	139188544	4.86608	0.0165788	0.887347	-1.13672	ENSG00000288785	+
chr2	208267795	4.86514	0.0165875	0.887347	-0.503176	PIKFYVE	+					CpG_Shore_2kb_Downstream
chr14	103032073	4.86488	0.0165899	0.887347	-0.579096	CDC42BPB	-
chr8	130357311	-4.86422	0.0165961	0.887347	0.548524	ASAP1	-					CpG_Shore_2kb_Upstream
chr2	95384980	-4.8639	0.016599	0.887347	0.887742			exon		3'UTR
chr13	25940231	4.86381	0.0165999	0.887347	-0.371667	ATP8A2	+
chr14	100535147	4.86333	0.0166044	0.887347	-0.29247								CpG_Shelf_2-4kb_Upstream
chr11	1589303	4.86223	0.0166146	0.887347	-0.367908	KRTAP5-AS1	+
chr1	203276107	4.86062	0.0166296	0.887347	-0.412981	LINC01353	+						CpG_Shelf_2-4kb_Downstream
chr15	83446715	4.85783	0.0166557	0.887347	-0.943103							CpG_Shore_2kb_Upstream		promoter_+_strand	SH3GL3
chr3	129621767	4.85737	0.01666	0.887347	-0.762178
chr8	144464160	4.85683	0.0166651	0.887347	-0.240527	ENSG00000254578	+	exon			CpG: 426
chr11	73387834	-4.85272	0.0167035	0.887347	0.765879	RELT	+
chr21	44932419	4.85142	0.0167158	0.887347	-0.963164						CpG: 134
chr3	8530603	4.84913	0.0167373	0.887347	-0.488927	LMCD1	+
chr5	1660166	4.84908	0.0167377	0.887347	-0.778386								CpG_Shelf_2-4kb_Upstream
chr11	44894084	4.84845	0.0167437	0.887347	-0.656166	TSPAN18	+
chr5	59038781	4.84621	0.0167648	0.887347	-0.188008	PDE4D	-					CpG_Shore_2kb_Upstream		promoter_+_strand	ENSG00000247345
chr2	42828063	4.84574	0.0167693	0.887347	-1.26713						CpG: 41			promoter_-_strand	CHORDC1P1
chr3	9124418	4.84401	0.0167856	0.887347	-1.21322	SRGAP3	-
chr18	50265970	-4.84118	0.0168124	0.887347	0.918044	CFAP53	-					CpG_Shore_2kb_Upstream	CpG_Shelf_2-4kb_Upstream
chr16	1097255	4.8399	0.0168245	0.887347	-0.675924								CpG_Shelf_2-4kb_Downstream
chr11	125216635	4.83747	0.0168475	0.887347	-0.882962	PKNOX2	+
chr13	113110243	4.83731	0.0168491	0.887347	-0.803153	F7	+				CpG: 369
chr1	2165800	4.83583	0.0168631	0.887347	-0.795753	PRKCZ	+						CpG_Shelf_2-4kb_Upstream
chr1	47687372	4.83506	0.0168704	0.887347	-1.15568
chr19	9913176	4.83347	0.0168855	0.887347	-1.95994	OLFM2	-				CpG: 166
chr6	37056472	4.83219	0.0168977	0.887347	-1.23412
chr2	231393903	4.83079	0.016911	0.887347	-1.06894	ENSG00000224376	+	exon				CpG_Shore_2kb_Upstream
chr3	50521671	-4.83036	0.0169152	0.887347	1.11144
chr16	8958179	4.82742	0.0169433	0.887347	-0.773475	USP7	-						CpG_Shelf_2-4kb_Downstream
chr3	13052411	4.82662	0.0169509	0.887347	-1.15381
chr18	22194240	4.82659	0.0169512	0.887347	-0.688366	GATA6	+
chr10	73840917	4.82655	0.0169516	0.887347	-0.853334	CAMK2G	-					CpG_Shore_2kb_Downstream		promoter_+_strand	ENSG00000229990
chr1	3317621	4.82651	0.0169519	0.887347	-0.598618	ENSG00000287828	-
chr15	28876987	4.82514	0.016965	0.887347	-0.721461
chr20	45344302	4.8184	0.0170298	0.887347	-0.5017	SDC4	-						CpG_Shelf_2-4kb_Upstream
chr1	43367062	4.81478	0.0170647	0.887347	-0.559281	ELOVL1	-	exon				CpG_Shore_2kb_Upstream
chr1	1541173	4.80997	0.0171112	0.887347	-1.10384						CpG: 154		CpG_Shelf_2-4kb_Downstream	promoter_-_strand	TMEM240
chr19	14258503	4.80868	0.0171237	0.887347	-0.915273	ENSG00000267723	-
chr20	32474957	4.80868	0.0171237	0.887347	-0.38247	NOL4L	-
chr1	245591983	4.80848	0.0171256	0.887347	-1.11302	KIF26B	+					CpG_Shore_2kb_Downstream
chr7	5296147	4.80727	0.0171374	0.887347	-0.593837	SLC29A4	+					CpG_Shore_2kb_Upstream	CpG_Shelf_2-4kb_Upstream
chr9	35491701	4.80628	0.017147	0.887347	-0.955473	ENSG00000287287	-	exon				CpG_Shore_2kb_Downstream
chr21	42057695	4.80606	0.0171491	0.887347	-0.372015									promoter_-_strand	ENSG00000289322
chr7	151793287	4.80557	0.0171538	0.887347	-1.51303	PRKAG2	-
chr10	48456722	4.80537	0.0171558	0.887347	-0.810942	ARHGAP22	-
chr2	234956935	4.80268	0.017182	0.887347	-1.08341	SH3BP4	+						CpG_Shelf_2-4kb_Downstream
chr22	44026282	4.80229	0.0171858	0.887347	-1.69818	PARVB	+					CpG_Shore_2kb_Downstream
chr17	80444405	4.80218	0.0171869	0.887347	-1.03794							CpG_Shore_2kb_Downstream
chr5	17464033	4.80203	0.0171883	0.887347	-1.13559	LINC02218	+
chr3	141849155	4.80198	0.0171889	0.887347	-0.438999
chr21	28738545	-4.80066	0.0172017	0.887347	1.05936
chr1	211925392	4.80064	0.0172019	0.887347	-0.673455
chr9	132486673	4.7964	0.0172433	0.887347	-0.703638	CFAP77	+				CpG: 35
chr2	127859777	4.79537	0.0172534	0.887347	-0.512963							CpG_Shore_2kb_Downstream
chr20	62752583	4.79418	0.017265	0.887347	-0.792545	NTSR1	+
chr17	1154350	4.79008	0.0173053	0.887347	-0.296391	ABR	-
chr7	98222979	4.78997	0.0173063	0.887347	-0.706968	TECPR1	-
chr3	128411066	4.78964	0.0173096	0.887347	-0.968036
chr17	2402648	4.78891	0.0173168	0.887347	-0.390602							CpG_Shore_2kb_Downstream
chr14	68947671	4.78523	0.017353	0.887347	-0.576305	ACTN1	-
chr11	1657758	4.78303	0.0173747	0.887347	-0.793091
chr13	20476627	4.78279	0.0173771	0.887347	-0.506411	CRYL1	-
chr12	131827199	4.78114	0.0173934	0.887347	-0.696904							CpG_Shore_2kb_Upstream
chr1	28883791	4.77878	0.0174168	0.887347	-0.789957								CpG_Shelf_2-4kb_Upstream
chr12	113057683	4.77749	0.0174296	0.887347	-0.502001	DTX1	+	exon	5'UTR		CpG: 115
chr22	35563522	4.77701	0.0174344	0.887347	-0.344361
chr3	180102217	4.77669	0.0174375	0.887347	-0.564911
chr1	2452952	-4.77639	0.0174405	0.887347	1.06521								CpG_Shelf_2-4kb_Upstream
chr5	178429213	4.77619	0.0174425	0.887347	-0.777304	COL23A1	-
chr9	35656525	4.77617	0.0174427	0.887347	-0.505893							CpG_Shore_2kb_Upstream
chr16	50549493	4.77561	0.0174482	0.887347	-0.397161	NKD1	+	exon			CpG: 188
chr1	228276717	4.77442	0.0174601	0.887347	-1.24993	OBSCN	+				CpG: 94		CpG_Shelf_2-4kb_Upstream	promoter_-_strand	ENSG00000269934
chr11	68783426	4.77422	0.017462	0.887347	-0.555863	CPT1A	-					CpG_Shore_2kb_Downstream
chr19	18306381	4.77406	0.0174636	0.887347	-0.705854	LSM4	-	exon		3'UTR			CpG_Shelf_2-4kb_Upstream
chr20	57481683	4.77119	0.0174922	0.887347	-0.537769
chr22	43531065	4.76829	0.0175212	0.887347	-0.474414	EFCAB6-AS1	+
chr9	6680834	4.76418	0.0175623	0.887347	-0.484306	ENSG00000236924	+					CpG_Shore_2kb_Upstream
chr12	131830100	4.76209	0.0175833	0.887347	-1.34764	MMP17	+				CpG: 266
chr22	39123267	4.76201	0.017584	0.887347	-0.55142
chr11	57155975	4.75852	0.0176191	0.887347	-0.419815
chr7	100683776	4.75226	0.0176822	0.887347	-0.664525	GIGYF1	-						CpG_Shelf_2-4kb_Upstream
chr7	98879713	4.74813	0.017724	0.887347	-0.0175788	TRRAP	+					CpG_Shore_2kb_Downstream
chr16	30122446	4.74759	0.0177295	0.887347	-0.470969	MAPK3	-	exon	5'UTR			CpG_Shore_2kb_Upstream
chr8	126862784	4.74574	0.0177483	0.887347	-0.447857
chr19	19460847	4.74557	0.01775	0.887347	-0.0504537	GATAD2A	+
chr12	65633875	4.74389	0.0177671	0.887347	-0.66579	ENSG00000256915	+
chr20	56781256	4.74328	0.0177733	0.887347	-0.476701
chr12	132178110	4.7432	0.0177741	0.887347	-0.347799							CpG_Shore_2kb_Upstream
chr10	128776757	4.74258	0.0177804	0.887347	-0.419733
chr17	76701091	4.74183	0.017788	0.887347	-0.811925	MXRA7	-
chr7	75774949	4.73963	0.0178105	0.887347	-0.943906	CCL26	-
chr19	33724211	-4.73934	0.0178134	0.887347	0.628798	CHST8	+
chr22	37340930	4.73873	0.0178197	0.887347	-0.515229	ELFN2	-	exon
chr5	1203937	4.73767	0.0178305	0.887347	-0.646158	SLC6A19	+					CpG_Shore_2kb_Downstream	CpG_Shelf_2-4kb_Upstream
chr19	1275156	4.73737	0.0178336	0.887347	-0.625343						CpG: 204			promoter_+_strand	FAM174C
chr7	27156572	4.73691	0.0178383	0.887347	-1.23808	HOXA7	-	exon	5'UTR		CpG: 78	CpG_Shore_2kb_Upstream	CpG_Shelf_2-4kb_Upstream
chr21	39021983	4.73651	0.0178423	0.887347	-0.438681	ENSG00000235888	-
chr12	124898637	-4.73586	0.017849	0.887347	1.18184
chr9	136056748	4.73389	0.0178691	0.887347	-0.420994	NACC2	-
chr5	173324407	4.73171	0.0178915	0.887347	-0.565512	STC2	-						CpG_Shelf_2-4kb_Upstream
chr2	94900058	4.73131	0.0178956	0.887347	-1.20485	MTCO1P48	-	exon						promoter_+_strand	MTCO3P45
chr7	101126624	4.73076	0.0179013	0.887347	-0.324472									promoter_+_strand	SERPINE1
chr11	44308642	-4.72939	0.0179153	0.887347	1.19298	ALX4	-					CpG_Shore_2kb_Upstream	CpG_Shelf_2-4kb_Upstream
chr18	79797216	4.72933	0.017916	0.887347	-0.546787	ENSG00000267780	+					CpG_Shore_2kb_Upstream	CpG_Shelf_2-4kb_Upstream	promoter_+_strand	KCNG2
chr19	50232194	4.72617	0.0179485	0.887347	-0.319004	MYH14	+					CpG_Shore_2kb_Downstream
chr15	65085840	4.71971	0.0180153	0.887347	-0.696309
chr6	107847736	4.71854	0.0180274	0.887347	-0.799301							CpG_Shore_2kb_Upstream
chr2	7879092	4.71732	0.01804	0.887347	-0.388581
chr11	68870870	4.71634	0.0180502	0.887347	-0.94476	LINC02701	+	exon
chr6	163181400	-4.7161	0.0180527	0.887347	1.40919	PACRG	+
chr2	26479722	4.71552	0.0180587	0.887347	-0.751554	OTOF	-
chr2	237668126	4.71501	0.018064	0.887347	-1.46564	LRRFIP1	+
chr18	8658089	-4.71497	0.0180644	0.887347	0.781592							CpG_Shore_2kb_Upstream
chr10	571167	4.71389	0.0180757	0.887347	-0.534654	DIP2C	-
chr4	8709867	4.71168	0.0180987	0.887347	-0.221069
chr1	92785648	4.71104	0.0181054	0.887347	-1.14958							CpG_Shore_2kb_Downstream		promoter_-_strand	EVI5
chr20	4759362	4.71042	0.0181118	0.887347	-0.57115							CpG_Shore_2kb_Upstream
chr4	55396948	4.70958	0.0181206	0.887347	-0.583988	TMEM165	+					CpG_Shore_2kb_Downstream
chr8	135790420	4.70935	0.0181229	0.887347	-0.667495
chr1	242890255	-4.70785	0.0181386	0.887347	0.633126	ENSG00000277704	+	exon				CpG_Shore_2kb_Upstream
chr14	102540642	4.70666	0.0181511	0.887347	-0.46517								CpG_Shelf_2-4kb_Upstream
chr15	29103622	4.70648	0.018153	0.887347	-0.899234	APBA2	+				CpG: 62
chr5	171469627	-4.706	0.0181579	0.887347	1.51944
chr9	137271784	-4.70539	0.0181643	0.887347	0.722213	NELFB	+					CpG_Shore_2kb_Upstream
chr1	168135757	-4.70349	0.0181843	0.887347	0.676337	GPR161	-					CpG_Shore_2kb_Upstream
chr10	1240571	-4.69848	0.0182368	0.887347	0.446548	ADARB2	-					CpG_Shore_2kb_Upstream
chr1	156913534	4.69836	0.0182381	0.887347	-0.784677	PEAR1	+	exon
chr12	132558946	4.69738	0.0182484	0.887347	-1.08082	FBRSL1	+				CpG: 29	CpG_Shore_2kb_Upstream	CpG_Shelf_2-4kb_Downstream
chr3	49910859	4.69628	0.01826	0.887347	-0.566082	MON1A	-	exon			CpG: 64
chr5	141051821	-4.69614	0.0182615	0.887347	0.647526	PCDHB1	+	exon
chr1	1352142	4.69567	0.0182665	0.887347	-1.07462							CpG_Shore_2kb_Downstream	CpG_Shelf_2-4kb_Upstream
chr17	77779809	4.69543	0.018269	0.887347	-1.02964
chr1	153778710	4.69522	0.0182712	0.887347	-1.38727	SLC27A3	+	exon					CpG_Shelf_2-4kb_Downstream
chr16	89003898	4.69238	0.0183011	0.887347	-0.0516955							CpG_Shore_2kb_Upstream
chr7	2643550	4.69201	0.0183051	0.887347	-1.1937	TTYH3	+						CpG_Shelf_2-4kb_Upstream
chr6	3625794	4.69161	0.0183093	0.887347	-1.14248
chr7	2474973	4.69066	0.0183194	0.887347	-0.653038	GRIFIN	-
chr20	20411574	4.68946	0.0183321	0.887347	-0.908144	RALGAPA2	-
chr13	98543097	4.68852	0.0183421	0.887347	-1.08868	STK24	-
chr14	101457910	4.68783	0.0183494	0.887347	-0.712449						CpG: 264
chr5	37211906	4.687	0.0183581	0.887347	-0.93057	OFD1P17	+	exon					CpG_Shelf_2-4kb_Downstream
chr11	2827828	4.68438	0.018386	0.887347	-0.629723	KCNQ1	+
chr16	81447402	4.68426	0.0183873	0.887347	-1.11299	CMIP	+					CpG_Shore_2kb_Downstream
chr8	143939054	4.68359	0.0183944	0.887347	-0.653371	PLEC	-						CpG_Shelf_2-4kb_Upstream
chr11	118926752	4.68327	0.0183978	0.887347	-0.458786							CpG_Shore_2kb_Downstream		promoter_-_strand	BCL9L
chr17	7582314	4.68297	0.018401	0.887347	-0.648348	ENSG00000233223	-	exon				CpG_Shore_2kb_Upstream
chr4	185656758	4.68278	0.018403	0.887347	-0.870675	SORBS2	-	exon	5'UTR
chr7	98754450	-4.68271	0.0184038	0.887347	0.862583
chr7	154913780	4.68266	0.0184043	0.887347	-0.398722							CpG_Shore_2kb_Upstream
chr1	248907036	-4.67981	0.0184346	0.887347	0.690326	PGBD2	+					CpG_Shore_2kb_Downstream
chr9	114285733	-4.67875	0.018446	0.887347	0.329702	COL27A1	+
chr7	157685486	4.67815	0.0184523	0.887347	-0.32804	PTPRN2	-				CpG: 206		CpG_Shelf_2-4kb_Upstream
chr17	39636504	4.67674	0.0184675	0.887347	-0.423235	PPP1R1B	+	exon		3'UTR		CpG_Shore_2kb_Upstream		promoter_+_strand	STARD3
chr14	29506800	4.67332	0.0185041	0.887347	-1.65965
chr1	32766396	4.6659	0.0185839	0.887347	-0.595021	KIAA1522	+
chr6	167184152	4.66578	0.0185852	0.887347	-0.408454
chr15	73367120	-4.66238	0.0186219	0.887347	0.705807	HCN4	-					CpG_Shore_2kb_Upstream
chr19	38737498	4.66094	0.0186374	0.887347	-0.730343	CAPN12	-	exon				CpG_Shore_2kb_Downstream		promoter_+_strand	ENSG00000267892
chr3	128007232	-4.65976	0.0186502	0.887347	0.503455
chr19	1045373	4.65748	0.0186749	0.887347	-0.543561	ABCA7	+					CpG_Shore_2kb_Upstream
chr11	708031	4.65647	0.0186859	0.887347	-0.922245	EPS8L2	+					CpG_Shore_2kb_Downstream
chr11	69948752	4.65633	0.0186875	0.887347	-0.560514
chr17	82314558	4.65175	0.0187373	0.887347	-1.2543								CpG_Shelf_2-4kb_Upstream
chr13	100561052	-4.6517	0.0187378	0.887347	0.762579	ENSG00000224356	-
chr1	6961550	4.64893	0.018768	0.887347	-0.712097	CAMTA1	+					CpG_Shore_2kb_Upstream
chr5	1009888	4.64876	0.0187699	0.887347	-0.8847	NKD2	+				CpG: 133
chr5	61659125	4.64868	0.0187708	0.887347	-1.02266	C5orf64	+	exon
chr9	137614832	4.64831	0.0187748	0.887347	-0.339984	ARRDC1	+	exon					CpG_Shelf_2-4kb_Upstream
chr1	7686697	4.6459	0.0188011	0.887347	-0.76478	CAMTA1	+
chr16	88549128	4.64585	0.0188017	0.887347	-1.28089
chr21	45543078	4.64336	0.018829	0.887347	-0.581913	SLC19A1	-				CpG: 159
chr20	37408090	4.64009	0.0188649	0.887347	-0.801297							CpG_Shore_2kb_Downstream
chr15	39933706	4.63972	0.0188689	0.887347	-0.756325							CpG_Shore_2kb_Upstream		promoter_+_strand	EIF2AK4
chr12	57240969	4.63777	0.0188905	0.887347	-0.12473							CpG_Shore_2kb_Upstream		promoter_-_strand	NDUFA4L2
chr16	54345007	4.63671	0.0189021	0.887347	-0.221152
chr5	1790422	4.63255	0.018948	0.887347	-1.52265
chr17	77453326	4.63059	0.0189697	0.887347	-0.700399	SEPTIN9	+					CpG_Shore_2kb_Downstream
chr22	50304244	4.62542	0.0190271	0.887347	-1.10638	PLXNB2	-						CpG_Shelf_2-4kb_Upstream
chr17	19317593	-4.62506	0.0190311	0.887347	0.797491	EPN2	+
chr1	6359932	4.61804	0.0191094	0.887347	-1.57518	ACOT7	-
chr7	5477876	4.61765	0.0191138	0.887347	-0.526613	ENSG00000230733	+	exon		3'UTR			CpG_Shelf_2-4kb_Upstream
chr9	135692294	4.61698	0.0191213	0.887347	-0.205448
chr6	157219259	4.61681	0.0191232	0.887347	-1.25597
chr8	28348934	4.61533	0.0191397	0.887347	-0.584326	ZNF395	-
chr1	229924986	4.61363	0.0191588	0.887347	-0.580803
chr19	12867960	4.6128	0.0191681	0.887347	-0.845272	MAST1	+	exon			CpG: 36
chr1	203471130	4.61154	0.0191822	0.887347	-0.445043
chr16	668787	4.61151	0.0191826	0.887347	-0.322273	RHOT2	+	exon			CpG: 103	CpG_Shore_2kb_Upstream
chr12	122644434	4.61098	0.0191886	0.887347	-0.753587
chr20	57662601	4.61042	0.0191948	0.887347	-0.932808	PMEPA1	-					CpG_Shore_2kb_Upstream
chr3	65954087	4.60873	0.0192139	0.887347	-1.56045	MAGI1	-
chr20	47356994	4.60849	0.0192166	0.887347	-0.157258									promoter_-_strand	ZMYND8
chr20	62482585	-4.60564	0.0192486	0.887347	0.533304
chr2	240999331	-4.60415	0.0192654	0.887347	0.994527	SNED1	+				CpG: 136
chr11	61052798	4.60144	0.0192962	0.887347	-0.86473
chr11	1838185	4.59932	0.0193202	0.887347	-0.828356									promoter_+_strand	TNNI2
chr1	243924810	4.59836	0.019331	0.887347	-0.473063	LINC02774	+
chr13	26496501	4.59788	0.0193365	0.887347	-0.945362
chr22	18973682	-4.59633	0.0193541	0.887347	0.973451	DGCR5	+						CpG_Shelf_2-4kb_Downstream
chr15	68701076	4.59616	0.019356	0.887347	-0.585799	CORO2B	+
chr4	7967621	4.59149	0.0194092	0.887347	-0.570175	ABLIM2	-
chr12	117045643	4.59041	0.0194216	0.887347	-0.0704589	TESC	-					CpG_Shore_2kb_Upstream
chr2	96090325	4.58858	0.0194425	0.887347	-0.387895
chr15	25844845	-4.58733	0.0194568	0.887347	0.819621	ATP10A	-
chr17	28709593	4.58617	0.0194701	0.887347	-0.362005	PROCA1	-					CpG_Shore_2kb_Upstream
chr22	20246851	4.58569	0.0194755	0.887347	-0.641035	RTN4R	-
chr9	128438570	-4.58395	0.0194954	0.887347	0.588953
chr15	29845660	4.58235	0.0195138	0.887347	-0.274263
chr20	3674153	4.58232	0.0195142	0.887347	-0.666639	ADAM33	-					CpG_Shore_2kb_Downstream
chr11	69166859	4.58193	0.0195186	0.887347	-0.668342	ENSG00000261070	-
chr19	5667847	4.58187	0.0195194	0.887347	-1.1538	SAFB	+	exon		3'UTR
chr14	105476072	4.57925	0.0195495	0.887347	-0.63373	CRIP2	+	exon				CpG_Shore_2kb_Upstream
chr7	130278156	4.57891	0.0195534	0.887347	-0.502218	CPA2	+
chr1	155322245	4.57872	0.0195556	0.887347	-0.89681	RUSC1-AS1	-	exon				CpG_Shore_2kb_Upstream
chr17	45169475	4.57845	0.0195587	0.887347	-0.629531	HEXIM2	+	exon			CpG: 25
chr9	127720674	4.57814	0.0195623	0.887347	-1.0647	PTRH1	-						CpG_Shelf_2-4kb_Upstream
chr20	32528730	4.57729	0.019572	0.887347	-0.509272	NOL4L	-
chr11	46296386	4.577	0.0195754	0.887347	-1.25438	CREB3L1	+					CpG_Shore_2kb_Downstream
chr14	101496537	4.57593	0.0195878	0.887347	-0.511678
chr9	136531507	4.57461	0.019603	0.887347	-0.43247	NOTCH1	-					CpG_Shore_2kb_Upstream	CpG_Shelf_2-4kb_Upstream
chr16	1074198	4.5733	0.0196182	0.887347	-1.07184	SSTR5	+					CpG_Shore_2kb_Downstream	CpG_Shelf_2-4kb_Downstream
chr4	3041350	4.56974	0.0196594	0.887347	-0.831705						CpG: 39
chr1	232225982	4.56651	0.0196969	0.887347	-0.581482
chr2	127408878	4.56528	0.0197113	0.887347	-0.609493							CpG_Shore_2kb_Downstream		promoter_-_strand	ENSG00000287742
chr17	81323105	4.5651	0.0197133	0.887347	-0.891268	TMEM105	-
chr12	132214267	4.56502	0.0197143	0.887347	-0.561379	GALNT9	-					CpG_Shore_2kb_Downstream
chr10	132229970	4.56312	0.0197364	0.887347	-0.540493	STK32C	-					CpG_Shore_2kb_Downstream	CpG_Shelf_2-4kb_Downstream
chr8	143408524	4.56137	0.0197568	0.887347	-0.230059							CpG_Shore_2kb_Downstream
chr2	241903170	4.56018	0.0197707	0.887347	-1.0209							CpG_Shore_2kb_Downstream
chr2	37875867	4.56001	0.0197728	0.887347	-0.315875			exon						promoter_-_strand	LINC00211
chr4	87622506	-4.55902	0.0197843	0.887347	0.757585	ENSG00000249001	-
chr10	44960558	4.55883	0.0197864	0.887347	-1.20421	RASSF4	+					CpG_Shore_2kb_Downstream		promoter_-_strand	TMEM72-AS1
chr7	150366341	4.55797	0.0197966	0.887347	-1.01824	REPIN1-AS1	-					CpG_Shore_2kb_Upstream
chr19	3313080	-4.55362	0.0198476	0.887347	0.94133							CpG_Shore_2kb_Upstream
chr22	38844534	-4.55335	0.0198507	0.887347	0.811451							CpG_Shore_2kb_Downstream		promoter_-_strand	NPTXR
chr1	26470394	4.5531	0.0198537	0.887347	-0.232324	DHDDS	+	exon		3'UTR		CpG_Shore_2kb_Upstream
chr8	97918563	4.55196	0.0198671	0.887347	-0.613832	MATN2	+
chr17	8326745	-4.55119	0.0198762	0.887347	0.446542							CpG_Shore_2kb_Upstream
chr8	143950080	4.54957	0.0198952	0.887347	-0.539339	PLEC	-					CpG_Shore_2kb_Upstream	CpG_Shelf_2-4kb_Upstream
chr1	202637655	4.54769	0.0199173	0.887347	-0.45226	SYT2	-
chr10	132181913	4.54696	0.0199259	0.887347	-0.20894	ENSG00000235010	-	exon					CpG_Shelf_2-4kb_Upstream
chr19	3057537	4.54647	0.0199317	0.887347	-0.551951	TLE5	-	exon					CpG_Shelf_2-4kb_Upstream
chr5	95823445	4.54613	0.0199358	0.887347	-0.653617									promoter_-_strand	GLRX
chr1	22114593	4.54479	0.0199516	0.887347	-0.540303
chr17	74770868	4.54477	0.0199518	0.887347	-0.762552	NAT9	-	exon		3'UTR
chr7	149423675	4.544	0.0199609	0.887347	-1.06474	ENSG00000261842	+	exon				CpG_Shore_2kb_Downstream
chr1	30783250	4.54184	0.0199865	0.887347	-0.470745
chr4	140470256	4.54137	0.019992	0.887347	-0.584464	MGAT4D	-
chr9	135094158	4.53946	0.0200147	0.887347	-0.252549	OLFM1	+
chr7	152894503	4.53671	0.0200474	0.887347	-0.636673						CpG: 29	CpG_Shore_2kb_Downstream
chr7	460256	-4.53389	0.020081	0.887347	0.585739								CpG_Shelf_2-4kb_Upstream
chr9	17018142	4.53172	0.020107	0.887347	-0.54997
chr6	41037123	4.5306	0.0201203	0.887347	-0.40505	UNC5CL	-
chr20	48374194	4.52919	0.0201371	0.887347	-1.03507							CpG_Shore_2kb_Downstream
chr16	46886966	4.52885	0.0201412	0.887347	-0.522713	GPT2	+					CpG_Shore_2kb_Downstream
chr10	1154737	-4.52782	0.0201536	0.887347	0.50439
chr21	14454228	4.52664	0.0201676	0.887347	-0.475931
chr1	206556803	4.52286	0.0202131	0.887347	-0.484446	RASSF5	+					CpG_Shore_2kb_Upstream
chr14	104932633	4.52229	0.0202199	0.887347	-0.500622	PLD4	+				CpG: 209
chr5	157464601	-4.52211	0.0202221	0.887347	0.405001	NIPAL4	+
chr2	583925	4.5211	0.0202342	0.887347	-0.52039							CpG_Shore_2kb_Downstream
chr20	63281323	4.51975	0.0202506	0.887347	-0.567289	ARFGAP1	+	exon		3'UTR			CpG_Shelf_2-4kb_Upstream
chr20	25591771	4.51667	0.0202878	0.887347	-0.630695
chr1	19036305	-4.51655	0.0202891	0.887347	0.563677
chr1	24543261	4.51614	0.0202941	0.887347	-1.12178	NCMAP-DT	-
chr8	144180524	4.51329	0.0203286	0.887347	-1.09464	MROH1	+				CpG: 24
chr20	62359168	4.51156	0.0203495	0.887347	-1.48479	LAMA5	-
chr9	129406392	4.50963	0.020373	0.887347	-1.42976
chr16	88461638	4.50939	0.0203759	0.887347	-0.13847	ZFPM1	+
chr10	3260311	4.50784	0.0203947	0.887347	-0.606195
chr1	228621001	4.50517	0.0204273	0.887347	-0.398695						CpG: 71	CpG_Shore_2kb_Upstream	CpG_Shelf_2-4kb_Upstream
chr16	1999972	4.50419	0.0204392	0.887347	-0.356779	ZNF598	-	exon				CpG_Shore_2kb_Downstream	CpG_Shelf_2-4kb_Upstream
chr16	1030716	4.50388	0.020443	0.887347	-0.853527						CpG: 35	CpG_Shore_2kb_Downstream	CpG_Shelf_2-4kb_Downstream
chr19	48394643	4.50383	0.0204436	0.887347	-0.91694	GRIN2D	+						CpG_Shelf_2-4kb_Upstream
chr7	139179	4.50202	0.0204657	0.887347	-0.500089	ENSG00000242474	-
chr8	94718529	4.50059	0.0204832	0.887347	-0.631766							CpG_Shore_2kb_Upstream
chr7	20059149	4.49801	0.0205147	0.887347	-0.904467	ENSG00000243004	-
chr5	83177	4.49738	0.0205225	0.887347	-1.06951							CpG_Shore_2kb_Upstream
chr17	34370191	4.49705	0.0205266	0.887347	-0.714278
chr7	157661489	4.49665	0.0205315	0.887347	-0.338076	PTPRN2	-				CpG: 31	CpG_Shore_2kb_Upstream
chr7	151696499	4.49565	0.0205438	0.887347	-0.863722	PRKAG2	-
chr22	41910801	4.49556	0.0205449	0.887347	-1.25082	SHISA8	-				CpG: 175		CpG_Shelf_2-4kb_Upstream
chr9	126693938	4.49546	0.020546	0.887347	-0.461438	LMX1B	+						CpG_Shelf_2-4kb_Downstream
chr7	132475461	4.49535	0.0205475	0.887347	-0.897247	PLXNA4	-
chr22	27785840	4.49469	0.0205555	0.887347	-0.822033	MN1	-
chr4	3732315	4.49307	0.0205755	0.887347	-0.526287
chr19	1456160	4.49283	0.0205784	0.887347	-0.868767	APC2	+				CpG: 147
chr14	24431716	4.49271	0.0205799	0.887347	-0.358246	KHNYN	+	exon				CpG_Shore_2kb_Downstream
chr9	133003318	4.49169	0.0205925	0.887347	-0.204213
chr1	19338941	4.491	0.0206009	0.887347	-0.805587	CAPZB	-	exon		3'UTR		CpG_Shore_2kb_Downstream
chr22	41831465	4.4908	0.0206034	0.887347	-0.262235	SREBF2-AS1	-	exon		3'UTR		CpG_Shore_2kb_Upstream
chr5	179227994	4.49041	0.0206082	0.887347	-1.32186	ADAMTS2	-						CpG_Shelf_2-4kb_Downstream
chr1	59926467	4.48908	0.0206246	0.887347	-0.70911	CYP2J2	-					CpG_Shore_2kb_Upstream
chr4	146032610	4.48895	0.0206262	0.887347	-0.678673
chr22	24146748	4.48868	0.0206296	0.887347	-0.651349	CABIN1	+
chr12	46072269	4.48775	0.0206411	0.887347	-0.380068
chr5	1005541	4.48525	0.0206719	0.887347	-0.88463	ENSG00000272347	+	exon			CpG: 154		CpG_Shelf_2-4kb_Upstream
chr7	50668767	4.48119	0.0207223	0.887347	-0.998798	GRB10	-
chr1	14923767	4.47826	0.0207587	0.887347	-0.587092	KAZN	+					CpG_Shore_2kb_Upstream
chr15	91950569	4.47685	0.0207763	0.887347	-0.303427	SLCO3A1	+
chr4	186576323	4.47608	0.0207859	0.887347	-1.14406
chr19	48530629	4.47602	0.0207866	0.887347	-0.786386
chr15	88717456	4.47455	0.020805	0.887347	-0.693823
chr6	160262656	4.47349	0.0208182	0.887347	-0.92738								CpG_Shelf_2-4kb_Downstream
chr11	62396495	4.47122	0.0208467	0.887347	-0.352485
chr9	129624214	4.47006	0.0208612	0.887347	-0.726355	NTMT1	+					CpG_Shore_2kb_Upstream	CpG_Shelf_2-4kb_Downstream
chr17	45007246	4.46817	0.0208849	0.887347	-1.00231
chr16	74734988	4.466	0.020912	0.887347	-0.885567	FA2H	-
chr17	74760191	4.46493	0.0209255	0.887347	-0.549001	SLC9A3R1	+
chr16	28883086	4.46455	0.0209304	0.887347	-0.576628	ATP2A1	+						CpG_Shelf_2-4kb_Downstream
chr22	43486011	4.46447	0.0209313	0.887347	-0.791062	MPPED1	+
chr14	99676095	-4.46308	0.0209488	0.887347	0.855802	HHIPL1	+	exon		3'UTR		CpG_Shore_2kb_Downstream
chr10	129954604	4.46241	0.0209573	0.887347	-0.884442	EBF3	-						CpG_Shelf_2-4kb_Upstream
chr1	205661870	4.46171	0.020966	0.887347	-0.138844	SLC45A3	-	exon				CpG_Shore_2kb_Upstream
chr2	47848228	4.46013	0.020986	0.887347	-0.286397	FBXO11	-
chr16	3129647	4.45897	0.0210007	0.887347	-0.387669	ZNF213-AS1	-	exon
chr16	88766270	-4.45833	0.0210087	0.887347	0.26148	PIEZO1	-
chr5	176415916	4.45812	0.0210114	0.887347	-0.762013	CLTB	-					CpG_Shore_2kb_Upstream
chr16	30030210	4.45804	0.0210124	0.887347	-0.700015	TLCD3B	-
chr19	679288	4.45392	0.0210646	0.887347	-1.03252	FSTL3	+					CpG_Shore_2kb_Upstream	CpG_Shelf_2-4kb_Upstream
chr15	66355492	4.45392	0.0210646	0.887347	-0.650498	TIPIN	-					CpG_Shore_2kb_Upstream
chr11	131654332	4.45374	0.0210669	0.887347	-0.27793	NTM-AS1	-
chr22	46378306	4.45308	0.0210753	0.887347	-0.875805	CELSR1	-						CpG_Shelf_2-4kb_Upstream
chr11	2887759	4.45159	0.0210942	0.887347	-0.473726			exon		3'UTR		CpG_Shore_2kb_Downstream
chr1	2033385	4.45084	0.0211037	0.887347	-1.09176								CpG_Shelf_2-4kb_Downstream
chr12	124463207	-4.45079	0.0211043	0.887347	0.257221	NCOR2	-						CpG_Shelf_2-4kb_Upstream
chr21	43812035	4.4502	0.0211118	0.887347	-0.541273	AATBC	-	exon
chr14	91396565	4.45008	0.0211133	0.887347	-1.28055	CCDC88C	-
chr15	96421487	4.45006	0.0211136	0.887347	-0.0937275
chr3	184234366	4.44998	0.0211146	0.887347	-1.32935	VWA5B2	+	exon					CpG_Shelf_2-4kb_Downstream
chr9	17135949	4.44943	0.0211216	0.887347	-0.264112	CNTLN	+					CpG_Shore_2kb_Downstream
chr16	85240425	4.44932	0.0211231	0.887347	-0.67406	ENSG00000287787	+
chr3	164870603	4.44927	0.0211236	0.887347	-0.51323
chr17	81305805	4.44887	0.0211287	0.887347	-0.142814	LINC00482	-	exon
chr3	193902498	4.44873	0.0211306	0.887347	-0.581385
chr14	101235481	4.44731	0.0211486	0.887347	-0.228457
chr7	151064880	4.44375	0.0211941	0.887347	-0.551956	SLC4A2	+	exon
chr6	170153748	4.4433	0.0211999	0.887347	-0.624338
chr1	10676494	4.44082	0.0212316	0.887347	-0.680247	CASZ1	-
chr11	10292575	4.44059	0.0212346	0.887347	-0.501458	SBF2	-					CpG_Shore_2kb_Upstream	CpG_Shelf_2-4kb_Upstream
chr16	2033510	4.44044	0.0212365	0.887347	-0.33483	SLC9A3R2	+						CpG_Shelf_2-4kb_Upstream
chr3	194003087	-4.43847	0.0212618	0.887347	0.837797	LINC02026	-					CpG_Shore_2kb_Upstream
chr5	150641055	4.43815	0.0212659	0.887347	-0.586792	SYNPO	+
chr5	390705	4.43764	0.0212725	0.887347	-0.612537	AHRR	+					CpG_Shore_2kb_Upstream
chr13	26759735	4.43283	0.0213344	0.887347	-0.984558	GPR12	-	exon				CpG_Shore_2kb_Upstream
chr3	49277383	4.43159	0.0213503	0.887347	-0.839908	USP4	-	exon		3'UTR		CpG_Shore_2kb_Downstream		promoter_-_strand	C3orf62
chr10	102231463	4.42981	0.0213733	0.887347	-1.29225	PITX3	-				CpG: 141
chr7	2471208	4.42777	0.0213997	0.887347	-1.09276
chr16	1906563	4.4273	0.0214058	0.887347	-0.196947
chr17	58307928	4.42614	0.0214208	0.887347	-0.580174	TSPOAP1	-	exon
chr19	46415070	4.42498	0.0214359	0.887347	-0.554798							CpG_Shore_2kb_Downstream	CpG_Shelf_2-4kb_Downstream
chr1	151301186	4.42292	0.0214626	0.887347	-0.462065	PI4KB	-							promoter_-_strand	RN7SL444P
chr19	55242529	4.42245	0.0214688	0.887347	-0.442008	PPP6R1	-	exon
chr1	214333612	4.42239	0.0214695	0.887347	-0.255147	SMYD2	+	exon
chr7	5284870	4.42233	0.0214703	0.887347	-0.663436	SLC29A4	+					CpG_Shore_2kb_Downstream
chr1	226735823	4.42024	0.0214976	0.887347	-0.535556	ITPKB	-	exon				CpG_Shore_2kb_Upstream
chr6	110330050	4.42001	0.0215005	0.887347	-1.49633	METTL24	-
chr22	37485989	4.41682	0.0215421	0.887347	-0.627918	MFNG	-	exon
chr9	130461276	4.41546	0.0215598	0.887347	-0.17026	ASS1	+
chr8	97643258	4.4153	0.021562	0.887347	-0.432032							CpG_Shore_2kb_Upstream		promoter_+_strand	MTDH
chr1	1015593	4.4151	0.0215646	0.887347	-0.369371							CpG_Shore_2kb_Downstream	CpG_Shelf_2-4kb_Upstream
chr3	197490220	4.41486	0.0215677	0.887347	-0.938901
chr1	2194051	4.40941	0.0216392	0.887347	-0.237302	FAAP20	-	exon				CpG_Shore_2kb_Upstream	CpG_Shelf_2-4kb_Downstream
chr19	38507464	4.40931	0.0216404	0.887347	-0.379954	RYR1	+
chr19	5434260	4.40542	0.0216917	0.887347	-0.642732
chr8	739690	4.40526	0.0216937	0.887347	-0.970792	ENSG00000282375	+	exon				CpG_Shore_2kb_Downstream
chr7	149748262	-4.40448	0.021704	0.887347	1.44814
chr19	12782505	4.40374	0.0217138	0.887347	-0.276939						CpG: 88		CpG_Shelf_2-4kb_Downstream
chr8	9897669	4.40346	0.0217175	0.887347	-0.961797							CpG_Shore_2kb_Upstream
chr19	847995	4.40328	0.0217199	0.887347	-0.521324	PRTN3	+	exon		3'UTR	CpG: 22	CpG_Shore_2kb_Downstream	CpG_Shelf_2-4kb_Downstream
chr22	39617038	4.4017	0.0217408	0.887347	-1.01484	CACNA1I	+
chr2	16168972	4.40125	0.0217467	0.887347	-0.57323
chr17	78973372	-4.40043	0.0217575	0.887347	0.505279	LGALS3BP	-
chr7	132475695	4.39923	0.0217734	0.887347	-0.347258	PLXNA4	-
chr6	38167184	4.39817	0.0217875	0.887347	-0.792421
chr7	74285104	4.39671	0.0218068	0.887347	-1.05733	ENSG00000287815	-
chr1	11719421	4.39489	0.021831	0.887347	-0.329776	DRAXIN	+					CpG_Shore_2kb_Upstream
chr7	3028259	4.39414	0.021841	0.887347	-0.658675	CARD11	-
chr7	143360918	4.39335	0.0218514	0.887347	-1.2727	FAM131B	-	exon	5'UTR			CpG_Shore_2kb_Upstream
chr6	97979167	4.39301	0.021856	0.887347	-1.05755	ENSG00000271860	+	exon
chr5	472488	4.39246	0.0218633	0.887347	-0.761049	PP7080	-	exon		3'UTR	CpG: 281		CpG_Shelf_2-4kb_Upstream	promoter_+_strand	SLC9A3-AS1
chr4	3390838	4.3924	0.021864	0.887347	-0.375458	RGS12	+
chr17	73325455	4.3919	0.0218708	0.887347	-0.304522
chr17	76527702	4.39169	0.0218736	0.887347	-0.388768	CYGB	-	exon		3'UTR
chr21	42528432	4.39062	0.0218878	0.887347	-0.913493	SLC37A1	+
chr7	101718144	-4.38944	0.0219035	0.887347	0.394923
chr4	8261125	4.38862	0.0219145	0.887347	-1.02144
chr10	69839701	4.38645	0.0219434	0.887347	-0.807633	COL13A1	+
chr8	143494343	4.3849	0.0219643	0.887347	-0.580289	ZC3H3	-
chr19	43720106	4.38072	0.0220203	0.887347	-0.653101							CpG_Shore_2kb_Downstream
chr5	17056533	4.38039	0.0220247	0.887347	-0.444563
chr17	9240776	4.37807	0.022056	0.887347	-0.353231	NTN1	+	exon		3'UTR		CpG_Shore_2kb_Downstream
chr18	3230495	4.37699	0.0220705	0.887347	-0.698192	ENSG00000265399	+
chr11	71397238	4.37572	0.0220876	0.887347	-0.658946	ACTE1P	-
chr1	11320279	4.37499	0.0220975	0.887347	-0.833669
chr9	135714133	4.37487	0.022099	0.887347	-0.387077							CpG_Shore_2kb_Upstream		promoter_+_strand	KCNT1
chr5	6773187	4.3737	0.0221148	0.887347	-0.220815	LINC02236	+					CpG_Shore_2kb_Upstream
chr11	2838556	4.37358	0.0221165	0.887347	-0.392211	KCNQ1	+
chr5	1911801	4.37333	0.0221199	0.887347	-0.522737
chr17	81421697	4.37319	0.0221217	0.887347	-1.19219	BAHCC1	+					CpG_Shore_2kb_Downstream
chr6	149452346	4.37198	0.0221381	0.887347	-0.583456	ZC3H12D	-	exon		3'UTR		CpG_Shore_2kb_Downstream
chr1	28815744	4.37103	0.0221509	0.887347	-0.517235	OPRD1	+						CpG_Shelf_2-4kb_Downstream
chr11	554825	4.3688	0.0221811	0.887347	-0.6066	LRRC56	+	exon		3'UTR	CpG: 174
chr21	45913397	4.36859	0.0221841	0.887347	-0.429892	PCBP3	+					CpG_Shore_2kb_Upstream		promoter_+_strand	ENSG00000280604
chr17	3772090	4.36807	0.0221911	0.887347	-1.03768	ITGAE	-
chr1	155011284	4.36731	0.0222014	0.887347	-0.968785	ZBTB7B	+
chr15	74421992	4.36647	0.0222129	0.887347	-0.563178	SEMA7A	-
chr4	8229023	4.3649	0.0222342	0.887347	-0.310852	SH3TC1	+
chr1	10898772	4.36372	0.0222503	0.887347	-0.634188
chr20	3118196	4.36357	0.0222523	0.887347	-0.74408	UBOX5	-
chr17	78112880	4.36299	0.0222601	0.887347	-0.483892	TMC6	-	exon		3'UTR
chr2	108609462	4.36209	0.0222725	0.887347	-0.910009
chr1	3405152	4.36176	0.022277	0.887347	-0.662944	PRDM16	+				CpG: 75		CpG_Shelf_2-4kb_Upstream
chr13	30871165	4.36156	0.0222797	0.887347	-1.64355	LINC00545	+
chr19	40817431	4.36092	0.0222885	0.887347	-0.488317	ENSG00000268797	+
chr19	5479999	4.36049	0.0222943	0.887347	-0.173769							CpG_Shore_2kb_Downstream
chr1	196878093	-4.35965	0.0223057	0.887347	1.18882	ENSG00000285986	+				CpG: 29
chr1	205298629	4.35791	0.0223295	0.887347	-0.340733
chr17	44758408	4.35471	0.0223733	0.887347	-0.894404						CpG: 112	CpG_Shore_2kb_Upstream		promoter_+_strand	ADAM11
chr7	128155192	-4.35471	0.0223734	0.887347	0.431826
chr19	1113360	4.35336	0.0223919	0.887347	-0.511118	SBNO2	-					CpG_Shore_2kb_Downstream	CpG_Shelf_2-4kb_Downstream
chr15	35437545	4.35248	0.0224039	0.887347	-0.484932	DPH6	-
chr17	79165065	4.35214	0.0224087	0.887347	0.0208268	RBFOX3	-
chr10	71475879	4.3489	0.0224533	0.887347	-0.483626	CDH23	+
chr12	54564492	-4.34783	0.022468	0.887347	0.71463	PDE1B	+
chr12	122888633	4.34769	0.02247	0.887347	-0.554084	VPS37B	-	exon	5'UTR
chr19	17680300	-4.34644	0.0224871	0.887347	1.00149	UNC13A	-				CpG: 29
chr5	11346441	4.34622	0.0224902	0.887347	-0.422717	CTNND2	-	exon		3'UTR
chr9	92189659	4.34222	0.0225455	0.887347	-0.59083									promoter_-_strand	PRSS47
chr3	50350564	4.34166	0.0225533	0.887347	-0.592809	NPRL2	-	exon			CpG: 64			promoter_+_strand	CYB561D2
chr9	107768412	4.3386	0.0225957	0.887347	-0.648981
chr1	929037	4.33645	0.0226257	0.887347	-0.191232	SAMD11	+						CpG_Shelf_2-4kb_Downstream
chr10	110496970	4.33469	0.0226501	0.887347	-0.988401							CpG_Shore_2kb_Upstream		promoter_-_strand	DUSP5-DT
chr19	1757929	-4.33414	0.0226578	0.887347	0.667533	ONECUT3	+				CpG: 416
chr15	38565259	4.33367	0.0226644	0.887347	-0.230171						CpG: 137			promoter_-_strand	RASGRP1
chr1	16162817	4.33296	0.0226742	0.887347	-0.628227
chr1	54462365	4.33248	0.022681	0.887347	-0.976248
chr22	20196225	4.33214	0.0226857	0.887347	-0.381734
chr10	132878662	4.33067	0.0227063	0.887347	-0.763816	CFAP46	-					CpG_Shore_2kb_Upstream
chr12	132611003	4.33054	0.0227081	0.887347	-1.05262							CpG_Shore_2kb_Downstream		promoter_-_strand	LRCOL1
chr2	176161529	4.32973	0.0227194	0.887347	-1.08225	HOXD3	+					CpG_Shore_2kb_Upstream	CpG_Shelf_2-4kb_Upstream
chr1	183329799	4.32947	0.0227231	0.887347	-0.874086	NMNAT2	-
chr9	116686883	4.32836	0.0227385	0.887347	-0.314481	ASTN2	-	exon	5'UTR			CpG_Shore_2kb_Upstream		promoter_+_strand	TRIM32
chr17	6452366	4.32815	0.0227415	0.887347	-0.30483	PITPNM3	-	exon		3'UTR			CpG_Shelf_2-4kb_Upstream
chr16	1091697	-4.32446	0.0227932	0.887347	0.460242	C1QTNF8	-					CpG_Shore_2kb_Upstream
chr19	48837924	-4.32362	0.022805	0.887347	0.578982	PLEKHA4	-					CpG_Shore_2kb_Downstream
chr19	927755	4.32322	0.0228107	0.887347	-0.263511	ARID3A	+					CpG_Shore_2kb_Upstream	CpG_Shelf_2-4kb_Downstream
chr1	209106606	4.32281	0.0228165	0.887347	-0.585155									promoter_+_strand	ENSG00000287046
chr16	49835818	4.32242	0.0228219	0.887347	-0.435631	ZNF423	-						CpG_Shelf_2-4kb_Upstream
chr4	2285757	4.32227	0.022824	0.887347	-0.448829	ZFYVE28	-	exon	5'UTR
chr11	1694266	-4.32154	0.0228344	0.887347	0.694367						CpG: 21	CpG_Shore_2kb_Upstream
chr11	69984995	4.32089	0.0228435	0.887347	-0.52855							CpG_Shore_2kb_Upstream		promoter_+_strand	ENSG00000255191
chr19	49866417	4.31989	0.0228576	0.887347	-0.967419	PNKP	-	exon		3'UTR		CpG_Shore_2kb_Upstream	CpG_Shelf_2-4kb_Upstream
chr1	232526598	4.31968	0.0228605	0.887347	-0.58439	SIPA1L2	-
chr10	87618675	4.31888	0.0228718	0.887347	-0.700907	ENSG00000196566	-
chr9	121203324	4.31752	0.022891	0.887347	-1.61709	RN7SL181P	+	exon				CpG_Shore_2kb_Downstream
chr22	19903551	4.31534	0.0229219	0.887347	-0.675721	TXNRD2	-						CpG_Shelf_2-4kb_Upstream
chr12	5969370	-4.31499	0.0229268	0.887347	0.416454	VWF	-	exon
chr1	6609562	4.3119	0.0229707	0.887347	-1.39851								CpG_Shelf_2-4kb_Upstream
chr7	27129393	4.31164	0.0229743	0.887347	-0.522873	HOXA4	-	exon				CpG_Shore_2kb_Upstream
chr14	104625177	4.31124	0.0229799	0.887347	-0.825026
chr8	142726543	4.31087	0.0229853	0.887347	-0.204162	LNCOC1	-	exon			CpG: 175			promoter_+_strand	THEM6
chr5	180639892	4.31083	0.0229858	0.887347	-0.575654	FLT4	-
chr4	53906429	4.3094	0.0230061	0.887347	-0.61089	ENSG00000249706	+
chr11	623564	4.30882	0.0230143	0.887347	-0.364723	CDHR5	-					CpG_Shore_2kb_Upstream	CpG_Shelf_2-4kb_Upstream
chr7	106579330	-4.30807	0.023025	0.887347	0.64851	ENSG00000267052	-
chr12	132603497	4.30794	0.0230269	0.887347	-0.615977	LRCOL1	-				CpG: 45	CpG_Shore_2kb_Downstream	CpG_Shelf_2-4kb_Downstream
chr16	89005398	4.30676	0.0230437	0.887347	-0.655185							CpG_Shore_2kb_Downstream	CpG_Shelf_2-4kb_Downstream
chr7	99579975	4.30647	0.0230479	0.887347	-1.56656	ENSG00000272647	+					CpG_Shore_2kb_Upstream
chr17	77056195	4.30586	0.0230565	0.887347	-0.478462						CpG: 41
chr7	375384	4.30449	0.0230761	0.887347	-0.836482							CpG_Shore_2kb_Upstream
chr19	50778971	4.30445	0.0230766	0.887347	-0.461857
chr22	45878199	4.30422	0.02308	0.887347	-0.471256	ENSG00000235091	-	exon					CpG_Shelf_2-4kb_Upstream
chr9	129357235	4.30385	0.0230852	0.887347	-0.431531	LINC01503	+
chr16	88437583	4.30257	0.0231035	0.887347	-0.596633	ZNF469	+	exon			CpG: 132	CpG_Shore_2kb_Downstream
chr19	30276102	-4.30082	0.0231285	0.887347	0.676374
chr1	228378166	4.29934	0.0231498	0.887347	-0.594119	OBSCN	+					CpG_Shore_2kb_Upstream
chr19	55554907	4.29815	0.0231668	0.887347	-0.922975
chr1	15756384	4.29641	0.0231918	0.887347	-0.606211								CpG_Shelf_2-4kb_Upstream	promoter_+_strand	FBLIM1
chr16	87227870	4.2963	0.0231934	0.887347	-1.33088
chr2	10862511	4.2954	0.0232063	0.887347	-1.16309	LINC01954	+
chr11	66549032	-4.29467	0.0232167	0.887347	0.341852	ACTN3	+						CpG_Shelf_2-4kb_Downstream
chr9	136100871	-4.29465	0.0232171	0.887347	0.812362							CpG_Shore_2kb_Upstream
chr9	136606237	4.29411	0.0232248	0.887347	-0.572126
chr1	2204520	4.29365	0.0232315	0.887347	-0.590674						CpG: 143
chr6	43123822	4.29159	0.0232611	0.887347	-0.44067	PTK7	+
chr12	122184598	4.29086	0.0232717	0.887347	-0.702497	LRRC43	+	exon	5'UTR			CpG_Shore_2kb_Downstream
chr20	50197108	4.2904	0.0232783	0.887347	-0.760845
chr3	125142265	4.28952	0.023291	0.887347	-1.01608	SLC12A8	-					CpG_Shore_2kb_Downstream
chr9	135614589	4.28905	0.0232978	0.887347	-0.702878	ENSG00000236543	+
chr2	120765390	4.28719	0.0233247	0.887347	-0.330891
chr8	144412723	4.28697	0.0233278	0.887347	-0.491744	SLC39A4	-	exon			CpG: 99		CpG_Shelf_2-4kb_Upstream
chr2	127293324	-4.28569	0.0233464	0.887347	1.21934	ERCC3	-					CpG_Shore_2kb_Upstream		promoter_+_strand	ENSG00000286145
chr6	26567900	4.28533	0.0233516	0.887347	-1.89508
chr22	39940907	4.2847	0.0233608	0.887347	-0.721333	GRAP2	+
chr8	143946427	4.28321	0.0233825	0.887347	-0.540969	PLEC	-	exon	5'UTR			CpG_Shore_2kb_Downstream	CpG_Shelf_2-4kb_Upstream
chr18	48878672	4.28138	0.023409	0.887347	-0.976794
chr19	4908538	4.27915	0.0234415	0.887347	-0.605442							CpG_Shore_2kb_Upstream
chr15	92160796	4.27863	0.0234491	0.887347	-0.390465	SLCO3A1	+
chr18	79401531	4.27736	0.0234675	0.887347	-0.937107	NFATC1	+					CpG_Shore_2kb_Downstream
chr5	1118926	4.27546	0.0234953	0.887347	-0.787285
chr1	9269953	4.27515	0.0234998	0.887347	-0.456056	H6PD	+	exon		3'UTR
chr4	2068843	4.27358	0.0235227	0.887347	-0.720759	NAT8L	+	exon		3'UTR
chr19	779165	-4.27325	0.0235277	0.887347	0.732646
chr19	49897537	4.27315	0.0235291	0.887347	-0.539991	IL4I1	-
chr1	28813327	4.27259	0.0235373	0.887347	-0.573453	OPRD1	+					CpG_Shore_2kb_Downstream
chr14	104160728	4.27256	0.0235377	0.887347	-0.639438	KIF26A	+					CpG_Shore_2kb_Downstream	CpG_Shelf_2-4kb_Upstream
chr19	2307464	4.2725	0.0235386	0.887347	-0.696251	ENSG00000273734	+					CpG_Shore_2kb_Upstream
chr16	88100797	4.27011	0.0235736	0.887347	-0.491642	ENSG00000205037	-	exon				CpG_Shore_2kb_Upstream	CpG_Shelf_2-4kb_Upstream	promoter_+_strand	ENSG00000289563
chr9	126534264	4.26985	0.0235774	0.887347	-0.999951
chr10	123428469	-4.26935	0.0235848	0.887347	0.957036	LINC02641	+							promoter_-_strand	ENSG00000225152
chr13	20392090	4.26801	0.0236044	0.887347	-1.48889						CpG: 57		CpG_Shelf_2-4kb_Upstream
chr19	1327389	4.2658	0.023637	0.887347	-0.958776							CpG_Shore_2kb_Downstream	CpG_Shelf_2-4kb_Downstream
chr17	7562919	4.26563	0.0236394	0.887347	-0.969648	SENP3	+					CpG_Shore_2kb_Downstream		promoter_+_strand	SENP3-EIF4A1
chr12	6701155	-4.26563	0.0236395	0.887347	0.665494							CpG_Shore_2kb_Downstream		promoter_-_strand	PIANP
chr8	144327723	4.265	0.0236487	0.887347	-0.974931							CpG_Shore_2kb_Downstream	CpG_Shelf_2-4kb_Upstream	promoter_-_strand	DGAT1
chr2	231695882	4.26415	0.0236612	0.887347	-0.0752999
chr11	61764056	4.26167	0.0236979	0.887347	-0.638249	MYRF	+
chr11	63998033	4.26124	0.0237042	0.887347	-1.02881	OTUB1	+	exon		3'UTR		CpG_Shore_2kb_Upstream
chr5	3200154	4.25928	0.0237333	0.887347	-0.907959
chr20	63455694	4.25889	0.0237391	0.887347	-1.21603	KCNQ2	-					CpG_Shore_2kb_Downstream	CpG_Shelf_2-4kb_Downstream
chr1	54295206	4.25643	0.0237755	0.887347	-0.915634	SSBP3	-
chr2	240144031	4.25585	0.0237841	0.887347	-0.795123	OTOS	-
chr16	67392848	4.25565	0.0237871	0.887347	-0.612462	TPPP3	-					CpG_Shore_2kb_Upstream
chr5	17374258	4.2534	0.0238206	0.887347	-0.554489	ENSG00000249199	-
chr3	194730627	4.2527	0.0238308	0.887347	-0.685917	LINC01968	+
chr4	3483756	4.25267	0.0238314	0.887347	-0.492979	DOK7	+					CpG_Shore_2kb_Upstream
chr21	46065801	4.25204	0.0238408	0.887347	-0.618019
chr16	1054892	4.25188	0.0238432	0.887347	-0.427772								CpG_Shelf_2-4kb_Upstream
chr17	45257739	4.25001	0.023871	0.887347	-1.48212	SPATA32	-
chr8	21944777	4.24988	0.0238729	0.887347	-0.474709	XPO7	+
chr17	81339024	4.24912	0.0238842	0.887347	-0.305648								CpG_Shelf_2-4kb_Upstream
chr9	133901438	4.2488	0.023889	0.887347	-0.606113	VAV2	-
chr3	47885860	-4.24612	0.023929	0.887347	0.346963	MAP4	-
chr14	100676390	4.24457	0.0239523	0.887347	-0.95812	ENSG00000258717	-	exon
chr20	16519905	4.24425	0.0239571	0.887347	-0.378298	KIF16B	-
chr5	1029009	4.24262	0.0239814	0.887347	-0.19924	NKD2	+						CpG_Shelf_2-4kb_Downstream
chr22	39021800	4.24122	0.0240025	0.887347	-1.11514	APOBEC3D	+
chr11	116505001	4.24046	0.024014	0.887347	-0.624208
chr9	134757351	4.24	0.0240208	0.887347	-0.4242	COL5A1	+
chr7	151114260	4.23991	0.0240222	0.887347	-0.819544	AGAP3	+					CpG_Shore_2kb_Upstream
chr16	81711236	4.23976	0.0240245	0.887347	-1.04688	CMIP	+	exon		3'UTR
chr11	74259042	4.23857	0.0240424	0.887347	-0.597633
chr1	228173928	4.23673	0.02407	0.887347	-0.67817	IBA57	+				CpG: 97
chr16	87279310	4.23624	0.0240775	0.887347	-0.291446	ENSG00000261697	-
chr6	10580725	4.23622	0.0240778	0.887347	-0.999925
chr9	136138456	4.23597	0.0240816	0.887347	-1.29463
chr11	126891706	-4.23436	0.0241058	0.887347	0.564229	KIRREL3	-
chr15	30196886	4.23426	0.0241073	0.887347	-1.08252	LINC02249	+					CpG_Shore_2kb_Downstream
chr19	932839	4.23318	0.0241236	0.887347	-0.765271	ARID3A	+				CpG: 24		CpG_Shelf_2-4kb_Downstream
chr11	61833742	4.23288	0.0241282	0.887347	-1.05412	FADS2	+
chr19	10704416	4.23248	0.0241342	0.887347	-0.42921	QTRT1	+						CpG_Shelf_2-4kb_Downstream
chr22	20429940	4.23114	0.0241545	0.887347	-1.59833	SCARF2	-				CpG: 230		CpG_Shelf_2-4kb_Downstream
chr12	4024939	4.23112	0.0241548	0.887347	-0.535417	ENSG00000256969	+
chr2	128289563	4.22806	0.0242012	0.887347	-0.752265	HS6ST1	-
chr18	69402192	4.22789	0.0242039	0.887347	-0.757554	DOK6	+					CpG_Shore_2kb_Upstream
chr11	47395475	4.22742	0.024211	0.887347	-0.603684	ENSG00000255197	-					CpG_Shore_2kb_Downstream
chr15	70196394	4.22732	0.0242125	0.887347	-0.543185	ENSG00000259252	-
chr17	80695924	4.22724	0.0242138	0.887347	-0.272192	RPTOR	+
chr7	149716724	4.22459	0.024254	0.887347	-0.209203	KRBA1	+					CpG_Shore_2kb_Downstream	CpG_Shelf_2-4kb_Upstream
chr18	74579581	4.22455	0.0242546	0.887347	-0.949386	CNDP1	+
chr6	163335891	4.2225	0.0242859	0.887347	-0.753883
chr19	53992042	4.22135	0.0243034	0.887347	-0.79245	CACNG6	+	exon	5'UTR			CpG_Shore_2kb_Upstream
chr9	96097864	4.22133	0.0243036	0.887347	-1.02961
chr10	132421582	4.22073	0.0243129	0.887347	-0.103167								CpG_Shelf_2-4kb_Upstream
chr20	62552571	-4.2204	0.0243178	0.887347	0.513854	MIR1-1HG	+					CpG_Shore_2kb_Upstream
chr11	64568425	4.21897	0.0243398	0.887347	-0.809867	SLC22A11	+				CpG: 36
chr10	132421413	4.21849	0.0243471	0.887347	-0.560282								CpG_Shelf_2-4kb_Upstream
chr19	38812405	4.21711	0.0243683	0.887347	-0.567652	LGALS4	-
chr2	10814357	4.21586	0.0243873	0.887347	-0.466575	PDIA6	-					CpG_Shore_2kb_Downstream
chr12	121443355	-4.21522	0.0243972	0.887347	0.435632	KDM2B	-	exon				CpG_Shore_2kb_Upstream
chr15	73317969	4.21449	0.0244084	0.887347	-0.741154							CpG_Shore_2kb_Upstream
chr7	157723371	4.21308	0.0244301	0.887347	-0.7317	PTPRN2	-
chr7	155350065	4.21256	0.024438	0.887347	-0.733177						CpG: 81
chr2	121284347	4.21105	0.0244612	0.887347	-0.409595	TFCP2L1	-					CpG_Shore_2kb_Upstream
chr20	53525099	4.21099	0.0244622	0.887347	-0.610599
chr15	93073747	4.21051	0.0244696	0.887347	-0.478034	RGMA	-	exon			CpG: 134
chr4	7426879	4.21046	0.0244704	0.887347	-0.374243	SORCS2	+
chr1	10739195	4.2088	0.0244959	0.887347	-0.401211	CASZ1	-
chr9	2241425	4.20856	0.0244996	0.887347	-0.281466						CpG: 24	CpG_Shore_2kb_Upstream
chr1	1111640	4.20809	0.0245068	0.887347	-1.17168	C1orf159	-					CpG_Shore_2kb_Downstream	CpG_Shelf_2-4kb_Upstream
chr1	1305902	4.20795	0.024509	0.887347	-1.02668	ACAP3	-	exon				CpG_Shore_2kb_Upstream
chr1	206555614	4.20607	0.024538	0.887347	-1.03032	RASSF5	+					CpG_Shore_2kb_Upstream
chr5	62138919	4.20582	0.024542	0.887347	-0.524427
chr22	20973995	4.20534	0.0245493	0.887347	-0.507921	AIFM3	+
chr7	4265362	-4.20517	0.024552	0.887347	0.817717	SDK1	+	exon			CpG: 136
chr16	31427905	4.20453	0.0245618	0.887347	-1.00799	COX6A2	-				CpG: 86			promoter_+_strand	ENSG00000277543
chr18	79567533	4.20274	0.0245896	0.887347	-0.606386
chr20	63548981	4.20242	0.0245945	0.887347	-0.947836							CpG_Shore_2kb_Downstream
chr17	77529288	4.20131	0.0246118	0.887347	-0.550202	ENSG00000267665	+	exon				CpG_Shore_2kb_Downstream
chr22	26429945	4.19966	0.0246374	0.887347	-0.854281	ASPHD2	+					CpG_Shore_2kb_Downstream	CpG_Shelf_2-4kb_Upstream
chr10	133198844	4.19907	0.0246466	0.887347	-0.829856	KNDC1	+	exon					CpG_Shelf_2-4kb_Upstream
chr16	68742715	4.19814	0.024661	0.887347	-1.04067	CDH1	+
chr1	54924102	4.19712	0.0246768	0.887347	-0.24714	ENSG00000242396	+
chr21	31654495	4.19643	0.0246877	0.887347	-0.565429	ENSG00000234509	-	exon
chr22	23908827	4.19587	0.0246963	0.887347	-0.497964
chr17	50259030	4.19522	0.0247065	0.887347	-0.847946
chr8	65152102	4.1947	0.0247146	0.887347	-1.11271
chr19	831924	4.19428	0.0247211	0.887347	-0.0728866	AZU1	+	exon		3'UTR			CpG_Shelf_2-4kb_Upstream
chr11	128823385	4.19349	0.0247335	0.887347	-0.829324							CpG_Shore_2kb_Upstream
chr6	3742650	4.19301	0.0247409	0.887347	-0.351928	PXDC1	-
chr19	1291957	4.19295	0.0247419	0.887347	-0.935949	EFNA2	+					CpG_Shore_2kb_Downstream	CpG_Shelf_2-4kb_Upstream
chr5	169934349	4.19283	0.0247438	0.887347	-1.72749	DOCK2	+
chr20	34559552	4.19211	0.024755	0.887347	-0.433392	MAP1LC3A	+					CpG_Shore_2kb_Upstream
chr19	3135998	4.19122	0.0247689	0.887347	-0.451315									promoter_+_strand	GNA15
chr11	10456273	-4.19077	0.0247759	0.887347	0.774573	AMPD3	+	exon	5'UTR
chr12	6337630	4.19032	0.024783	0.887347	-1.17415	TNFRSF1A	-
chr21	44980468	4.19008	0.0247868	0.887347	-0.399147
chr19	2540476	4.18783	0.0248221	0.887347	-0.84885	GNG7	-					CpG_Shore_2kb_Upstream	CpG_Shelf_2-4kb_Upstream
chr1	201014109	4.18702	0.0248348	0.887347	-0.398229	KIF21B	-
chr1	54306184	4.18578	0.0248543	0.887347	-1.26118	SSBP3	-
chr12	47947677	4.185	0.0248665	0.887347	-0.667399
chr14	100711188	4.185	0.0248665	0.887347	-0.611941							CpG_Shore_2kb_Downstream
chr4	8133441	4.18494	0.0248674	0.887347	-0.643324	ABLIM2	-
chr17	4919890	4.18464	0.0248721	0.887347	-1.01323
chr6	163354208	4.18377	0.0248858	0.887347	-0.910876									promoter_-_strand	ENSG00000285726
chr11	70867375	4.18279	0.0249012	0.887347	-0.63145	SHANK2	-
chr10	93789382	4.1817	0.0249184	0.887347	-1.4778	LGI1	+	exon						promoter_-_strand	ENSG00000280485
chr9	136003388	4.1797	0.02495	0.887347	-0.392703
chr16	86753002	4.17663	0.0249985	0.887347	-0.616627
chr12	12022611	4.17651	0.0250004	0.887347	-0.408374
chr5	171314662	4.17453	0.0250318	0.887347	-1.15881						CpG: 96	CpG_Shore_2kb_Upstream
chr7	2641876	4.17328	0.0250517	0.887347	-0.496172	TTYH3	+							promoter_+_strand	ENSG00000288792
chr10	70479551	4.1731	0.0250544	0.887347	-0.856394	PALD1	+					CpG_Shore_2kb_Downstream
chr18	76529202	4.17217	0.0250692	0.887347	-0.818201	LINC00683	+
chr6	15661572	4.17203	0.0250715	0.887347	-0.333353	DTNBP1	-					CpG_Shore_2kb_Upstream
chr12	121781043	4.17194	0.0250729	0.887347	-0.508834	RHOF	-	exon		3'UTR
chr8	38139933	4.17175	0.0250758	0.887347	-0.593546			exon		3'UTR
chr12	131622569	4.17078	0.0250913	0.887347	-1.13763	ENSG00000256258	-
chr20	61442854	4.16731	0.0251466	0.887347	-0.678029	CDH4	+
chr19	18161175	4.16685	0.025154	0.887347	-0.375306	PIK3R2	+	exon			CpG: 49
chr12	132075533	-4.16673	0.0251558	0.887347	0.591206	EP400	+
chr5	1118618	4.16637	0.0251616	0.887347	-0.397982
chr4	1806737	4.16562	0.0251735	0.887347	-0.267135	FGFR3	+					CpG_Shore_2kb_Downstream	CpG_Shelf_2-4kb_Downstream
chr2	25277826	4.16487	0.0251855	0.887347	-1.56806	DNMT3A	-					CpG_Shore_2kb_Downstream
chr8	27348756	4.15863	0.0252855	0.887347	-0.6848	PTK2B	+
chr10	98361208	4.15821	0.0252922	0.887347	-1.03677
chr20	18261670	4.15815	0.0252933	0.887347	-0.591616
chr1	7021230	4.15667	0.0253171	0.887347	-0.676797	CAMTA1	+
chr9	127521440	4.15585	0.0253303	0.887347	-0.735954	NIBAN2	-
chr10	122171389	-4.15568	0.025333	0.887347	0.339712	TACC2	+
chr19	5806667	4.15557	0.0253347	0.887347	-0.470962	NRTN	+					CpG_Shore_2kb_Downstream
chr1	143423550	4.1552	0.0253408	0.887347	-0.530814
chr19	584848	4.15351	0.0253679	0.887347	-0.341348							CpG_Shore_2kb_Upstream	CpG_Shelf_2-4kb_Upstream
chr8	141183712	-4.15292	0.0253775	0.887347	0.600124	DENND3	+
chr1	40797515	4.15286	0.0253784	0.887347	-2.35735	KCNQ4	+
chr8	30228092	4.15241	0.0253856	0.887347	-0.309722
chr2	235677722	-4.15089	0.0254103	0.887347	0.77728	AGAP1	+
chr3	195859795	4.15065	0.0254142	0.887347	-0.96343
chr9	113565657	4.15058	0.0254152	0.887347	-0.427816	RGS3	+	exon
chr15	64843290	4.14879	0.0254442	0.887347	-0.345003	PLEKHO2	+					CpG_Shore_2kb_Downstream
chr1	246607805	4.14849	0.0254491	0.887347	-0.708806	ENSG00000225300	+	exon
chr11	118922413	4.14811	0.0254552	0.887347	-0.386756	BCL9L	-						CpG_Shelf_2-4kb_Upstream
chr12	132437844	4.14639	0.0254831	0.887347	-0.977094							CpG_Shore_2kb_Upstream	CpG_Shelf_2-4kb_Downstream
chr18	48709576	4.14458	0.0255125	0.887347	-0.417925	CTIF	+
chr14	100015602	4.1445	0.0255138	0.887347	-0.368275
chr13	112895010	4.1436	0.0255284	0.887347	-0.706538							CpG_Shore_2kb_Downstream	CpG_Shelf_2-4kb_Upstream
chr19	375748	4.14258	0.025545	0.887347	-0.270357	THEG	-	exon				CpG_Shore_2kb_Upstream
chr20	50635786	4.14194	0.0255555	0.887347	-1.0442	RIPOR3	-
chr19	7854002	4.14134	0.0255653	0.887347	-0.657789	EVI5L	+
chr2	65479623	4.13834	0.0256142	0.887347	-0.934356	ENSG00000204929	+
chr5	174419144	4.13738	0.0256298	0.887347	-0.2389	LINC01411	+
chr19	384308	4.137	0.0256361	0.887347	-0.860656	ENSG00000286667	+	exon			CpG: 16		CpG_Shelf_2-4kb_Upstream
chr9	137454735	4.13628	0.0256478	0.887347	-0.585057	NSMF	-					CpG_Shore_2kb_Upstream	CpG_Shelf_2-4kb_Upstream
chr17	2181787	4.13563	0.0256585	0.887347	-0.398976	SMG6	-
chr15	40325553	-4.13313	0.0256994	0.887347	0.383364	INAFM2	+	exon		3'UTR		CpG_Shore_2kb_Downstream
chr21	45979336	4.13249	0.0257099	0.887347	-1.94264							CpG_Shore_2kb_Upstream	CpG_Shelf_2-4kb_Upstream
chr16	89827909	4.13146	0.0257269	0.887347	-0.205757						CpG: 134			promoter_+_strand	SPIRE2
chr9	130500325	4.13125	0.0257304	0.887347	-0.48462	ASS1	+
chr19	14393410	4.12934	0.0257617	0.887347	-0.835577	ADGRE5	+
chr19	17993254	4.12769	0.0257889	0.887347	-0.901261	KCNN1	+
chr17	50571836	4.12729	0.0257955	0.887347	-0.808142	CACNA1G	+
chr11	67352990	4.12721	0.0257968	0.887347	-0.525784	POLD4	-	exon	5'UTR			CpG_Shore_2kb_Upstream		promoter_+_strand	ENSG00000274251
chr5	139482886	4.12717	0.0257974	0.887347	-0.572007			exon						promoter_-_strand	STING1
chr8	143013508	4.12518	0.0258304	0.887347	-0.472065	LY6E-DT	-
chr20	63008668	4.12487	0.0258354	0.887347	-0.679505							CpG_Shore_2kb_Upstream		promoter_+_strand	LINC01749
chr19	17282610	4.1248	0.0258366	0.887347	-0.359146	ANKLE1	+	exon	5'UTR		CpG: 116
chr11	132712595	4.12424	0.0258458	0.887347	-0.746251	OPCML	-
chr9	136722989	4.12143	0.0258923	0.887347	-0.800593	DIPK1B	+	exon				CpG_Shore_2kb_Upstream
chr16	88428302	4.11914	0.0259303	0.887347	-0.772171	ZNF469	+	exon				CpG_Shore_2kb_Upstream	CpG_Shelf_2-4kb_Upstream
chr1	22384229	4.11901	0.0259324	0.887347	-0.578429
chr8	13214333	4.11893	0.0259337	0.887347	-1.09055			exon
chr21	45609037	-4.11729	0.025961	0.887347	0.735225	ENSG00000286594	+	exon
chr7	150947045	4.11508	0.0259977	0.887347	-1.1998	KCNH2	-	exon				CpG_Shore_2kb_Upstream	CpG_Shelf_2-4kb_Upstream
chr11	115646096	4.11495	0.026	0.887347	-0.692207	ENSG00000260254	+	exon
chr4	6009572	-4.11471	0.0260039	0.887347	0.917859	C4orf50	-					CpG_Shore_2kb_Downstream
chr15	84602076	4.11401	0.0260155	0.887347	-0.352301	ZSCAN2	+	exon	5'UTR			CpG_Shore_2kb_Downstream
chr1	109300824	4.11334	0.0260268	0.887347	-0.601653	MYBPHL	-
chr15	101501827	4.11272	0.0260371	0.887347	-0.843682									promoter_-_strand	ENSG00000289271
chr21	44817352	4.11247	0.0260413	0.887347	-0.107307	SUMO3	-				CpG: 238
chr1	23037229	-4.11138	0.0260595	0.887347	0.974134	KDM1A	+
chr9	136997996	-4.11132	0.0260605	0.887347	0.45689								CpG_Shelf_2-4kb_Downstream
chr19	1396317	4.11114	0.0260636	0.887347	-0.530244	ENSG00000248015	-	exon					CpG_Shelf_2-4kb_Upstream
chr17	63989031	4.11063	0.0260719	0.887347	-0.836008	ENSG00000263489	-
chr10	114514230	4.10994	0.0260835	0.887347	-0.883251	ABLIM1	-
chr5	1167891	4.10931	0.0260941	0.887347	-0.762569								CpG_Shelf_2-4kb_Upstream
chr1	26361255	4.10785	0.0261186	0.887347	-0.645367							CpG_Shore_2kb_Downstream
chr17	81409994	4.10649	0.0261413	0.887347	-0.578639	BAHCC1	+						CpG_Shelf_2-4kb_Downstream
chr17	21513232	4.10368	0.0261885	0.887347	-0.281129	LINC02693	-				CpG: 22	CpG_Shore_2kb_Downstream
chr10	127907996	4.10235	0.0262108	0.887347	-0.68226							CpG_Shore_2kb_Downstream
chr17	35783649	4.10174	0.0262211	0.887347	-1.56294	MMP28	-
chr5	132258457	4.10156	0.0262242	0.887347	-0.623137	PDLIM4	+					CpG_Shore_2kb_Downstream
chr10	99297248	4.10129	0.0262287	0.887347	-0.416585
chr2	239308075	4.09962	0.0262568	0.887347	-0.177005	HDAC4	-
chr6	8436042	4.09907	0.0262661	0.887347	-0.487494	HULC	+	exon				CpG_Shore_2kb_Downstream		promoter_-_strand	SLC35B3
chr14	74329964	4.09868	0.0262727	0.887347	-0.348151
chr11	126358339	4.09645	0.0263104	0.887347	-0.194513	ST3GAL4	+	exon	5'UTR				CpG_Shelf_2-4kb_Downstream
chr4	152950004	4.09589	0.0263199	0.887347	-0.663372	FHDC1	+
chr20	32605498	4.0951	0.0263332	0.887347	-0.231789	NOL4L-DT	+
chr9	134793510	4.09501	0.0263348	0.887347	-0.306705	COL5A1	+
chr14	99523551	-4.09447	0.0263439	0.887347	1.27289	CCDC85C	-
chr19	46697721	4.09431	0.0263466	0.887347	-0.910405	PRKD2	-				CpG: 21		CpG_Shelf_2-4kb_Downstream
chr7	26148061	4.09317	0.026366	0.887347	-0.9315
chr9	127540836	4.09162	0.0263921	0.887347	-0.669326	NIBAN2	-
chr3	51942869	4.09082	0.0264057	0.887347	-0.489417	PARP3	+	exon	5'UTR			CpG_Shore_2kb_Downstream		promoter_-_strand	RRP9
chr11	61577012	4.09022	0.026416	0.887347	-0.335111	SYT7	-						CpG_Shelf_2-4kb_Upstream
chr2	43039706	-4.08974	0.0264242	0.887347	0.364477			exon						promoter_-_strand	LINC01819
chr8	41834942	4.0865	0.0264793	0.887347	0.0188281
chr3	48564468	4.08604	0.0264872	0.887347	-0.977361	COL7A1	-	exon						promoter_-_strand	UCN2
chr22	49848268	-4.0854	0.026498	0.887347	0.731511						CpG: 198
chr17	81329713	4.08501	0.0265047	0.887347	-0.488626	TMEM105	-
chr20	2380020	4.08485	0.0265074	0.887347	-0.687648									promoter_+_strand	TGM6
chr6	113860232	4.08374	0.0265263	0.887347	-0.803102	MARCKS	+	exon			CpG: 205
chr6	151175842	4.08361	0.0265285	0.887347	-0.57822	ENSG00000223598	-
chr6	41660160	4.08163	0.0265625	0.887347	-0.633937
chr12	117141244	4.08128	0.0265685	0.887347	-0.95372	TESC-AS1	+
chr5	150319395	4.08127	0.0265687	0.887347	-0.123515
chr14	89418776	4.08041	0.0265835	0.887347	-0.318597	FOXN3-AS1	+					CpG_Shore_2kb_Downstream
chr5	141695785	4.0799	0.0265921	0.887347	-0.904264								CpG_Shelf_2-4kb_Downstream
chr11	1750702	4.07987	0.0265926	0.887347	-0.337762	ENSG00000250644	-					CpG_Shore_2kb_Downstream	CpG_Shelf_2-4kb_Upstream	promoter_-_strand	IFITM10
chr5	151100517	4.0796	0.0265972	0.887347	-0.812376
chr19	7856790	-4.07855	0.0266153	0.887347	0.931371	EVI5L	+
chr20	2709604	4.07766	0.0266305	0.887347	-0.825376	EBF4	+	exon
chr8	11440254	4.07721	0.0266383	0.887347	-0.510554	FAM167A	-
chr2	20230029	4.07645	0.0266513	0.887347	-1.04562
chr14	103100396	4.07619	0.0266558	0.887347	-0.824029	EXOC3L4	+	exon				CpG_Shore_2kb_Upstream
chr5	77088089	4.07517	0.0266734	0.887347	-1.14607	ZBED3-AS1	+	exon				CpG_Shore_2kb_Downstream		promoter_-_strand	ZBED3
chr7	73624780	4.07474	0.0266807	0.887347	-1.21326							CpG_Shore_2kb_Downstream		promoter_-_strand	MLXIPL
chr20	63979945	4.07428	0.0266886	0.887347	-0.603089			exon				CpG_Shore_2kb_Downstream		promoter_-_strand	SAMD10
chr20	3680167	4.07413	0.0266912	0.887347	-1.446	ADAM33	-					CpG_Shore_2kb_Upstream
chr12	3184684	4.07406	0.0266924	0.887347	-0.714777	TSPAN9	+
chr17	1181888	4.07349	0.0267023	0.887347	-1.09669							CpG_Shore_2kb_Downstream	CpG_Shelf_2-4kb_Downstream	promoter_+_strand	ENSG00000235361
chr7	152784695	4.07256	0.0267183	0.887347	-0.830814	ACTR3B	+
chr16	85136535	4.07221	0.0267243	0.887347	-0.616621							CpG_Shore_2kb_Upstream		promoter_+_strand	LINC02139
chr6	157246603	4.07154	0.0267358	0.887347	-0.591873
chr13	44416144	4.07119	0.0267419	0.887347	-0.178732
chr15	78339927	4.07071	0.0267503	0.887347	-1.04031	ENSG00000279694	-	exon				CpG_Shore_2kb_Upstream		promoter_+_strand	CRABP1
chr16	31009810	4.07057	0.0267527	0.887347	-0.243853	STX1B	-					CpG_Shore_2kb_Upstream
chr1	47340005	4.07039	0.0267558	0.887347	-0.196097	CMPK1	+
chr3	13528555	4.07015	0.0267599	0.887347	-0.603576
chr15	77816160	-4.06977	0.0267666	0.887347	0.47167								CpG_Shelf_2-4kb_Upstream
chr1	16725211	4.06851	0.0267884	0.887347	-1.12195						CpG: 38
chr2	69740612	4.0685	0.0267885	0.887347	-0.330298							CpG_Shore_2kb_Upstream
chr15	38864916	4.06766	0.026803	0.887347	-0.522213	LINC02694	+
chr22	23213164	4.06728	0.0268096	0.887347	-0.594124	BCR	+
chr11	47566409	4.06704	0.0268137	0.887347	-1.07466	PTPMT1	+					CpG_Shore_2kb_Downstream
chr1	21652794	4.06544	0.0268414	0.887347	-0.651858	RAP1GAP	-					CpG_Shore_2kb_Downstream
chr12	114649639	4.06529	0.026844	0.887347	-0.94553
chr16	84929858	4.0649	0.0268508	0.887347	-0.247948	LINC02176	+
chr19	5990461	4.06479	0.0268527	0.887347	-0.339802	RANBP3-DT	+
chr10	70919263	4.06477	0.0268531	0.887347	-0.653194							CpG_Shore_2kb_Downstream
chr17	62680004	4.06471	0.0268541	0.887347	-1.62543	ENSG00000279713	-	exon			CpG: 87
chr9	130481736	4.0647	0.0268544	0.887347	-0.495264	ASS1	+
chr15	29656000	4.06334	0.0268779	0.887347	-1.09805
chr1	61338267	-4.06314	0.0268815	0.887347	0.826449	NFIA	+
chr1	1158699	4.06247	0.0268931	0.887347	-0.953798							CpG_Shore_2kb_Downstream	CpG_Shelf_2-4kb_Upstream
chr9	129675485	4.0624	0.0268943	0.887347	-0.341343	PRRX2	+					CpG_Shore_2kb_Upstream
chr11	1228252	-4.06089	0.0269206	0.887347	0.703366	MUC5B	+					CpG_Shore_2kb_Downstream	CpG_Shelf_2-4kb_Upstream
chr10	79348272	4.05898	0.0269538	0.887347	-0.415873	PPIF	+					CpG_Shore_2kb_Downstream
chr2	120876464	-4.05864	0.0269598	0.887347	0.56311	GLI2	+
chr19	4878093	-4.05821	0.0269672	0.887347	0.483169
chr1	32951512	4.05818	0.0269678	0.887347	-0.424042	RNF19B	-	exon
chr1	156894776	4.05629	0.0270009	0.887347	-0.656168	PEAR1	+					CpG_Shore_2kb_Downstream
chr15	89087832	-4.05557	0.0270135	0.887347	1.14322	ENSG00000261407	-	exon				CpG_Shore_2kb_Upstream		promoter_+_strand	ABHD2
chr11	126452505	4.05541	0.0270163	0.887347	-0.986366	KIRREL3	-
chr21	43328767	4.0551	0.0270216	0.887347	-0.876668	LINC00322	-
chr16	86752764	4.05422	0.0270371	0.887347	-0.680555
chr7	4744036	4.05248	0.0270676	0.887347	-0.557823	FOXK1	+					CpG_Shore_2kb_Upstream	CpG_Shelf_2-4kb_Upstream
chr16	82628271	4.05227	0.0270713	0.887347	-1.34422	CDH13	+					CpG_Shore_2kb_Downstream
chr22	50306497	4.05114	0.0270911	0.887347	-0.388586	PLXNB2	-					CpG_Shore_2kb_Upstream
chr20	57108909	4.05082	0.0270967	0.887347	-1.12735							CpG_Shore_2kb_Upstream
chr18	24918055	4.05038	0.0271044	0.887347	-1.05966	ENSG00000266573	+
chr22	17962348	4.04999	0.0271113	0.887347	-0.674191	MICAL3	-
chr1	1245769	4.04968	0.0271167	0.887347	-0.893751	C1QTNF12	-					CpG_Shore_2kb_Upstream	CpG_Shelf_2-4kb_Downstream
chr17	79024955	4.04966	0.027117	0.887347	-1.28012	C1QTNF1-AS1	-	exon				CpG_Shore_2kb_Downstream
chr3	197655862	4.04939	0.0271218	0.887347	-0.764242							CpG_Shore_2kb_Downstream	CpG_Shelf_2-4kb_Upstream
chr3	13013324	4.04866	0.0271347	0.887347	-0.553323
chr16	86198325	4.04771	0.0271514	0.887347	-0.458736	ENSG00000268505	-	exon
chr5	174312492	4.04724	0.0271597	0.887347	-0.700664						CpG: 60
chr7	157855653	4.04679	0.0271675	0.887347	-0.109077	PTPRN2-AS1	+					CpG_Shore_2kb_Downstream
chr10	122154224	4.04632	0.0271759	0.887347	-0.662699	ENSG00000285973	-
chr16	88804623	4.04628	0.0271766	0.887347	-0.844447	CDT1	+	exon				CpG_Shore_2kb_Downstream
chr18	63025293	4.04622	0.0271776	0.887347	-0.385652
chr1	3403844	4.04579	0.0271853	0.887347	-0.373331	PRDM16	+					CpG_Shore_2kb_Upstream
chr1	18949489	-4.04563	0.027188	0.887347	0.521394	IFFO2	-
chr7	2476856	4.04525	0.0271948	0.887347	-0.849598			exon						promoter_-_strand	GRIFIN
chr5	179417144	-4.04463	0.0272056	0.887347	0.752573
chr1	234987358	4.04432	0.0272111	0.887347	-1.15233
chr7	149815755	4.04341	0.0272272	0.887347	-0.969853	SSPOP	+	exon
chr10	110376484	4.04201	0.0272521	0.887347	-1.00184
chr1	155125689	4.04159	0.0272594	0.887347	-0.617372							CpG_Shore_2kb_Upstream
chr4	8379195	-4.04147	0.0272615	0.887347	0.518752	ACOX3	-						CpG_Shelf_2-4kb_Downstream
chr1	10594770	4.04106	0.0272687	0.887347	-1.90298	PEX14	+
chr17	6567813	4.04086	0.0272724	0.887347	-0.518557
chr9	70204981	4.04009	0.027286	0.887347	-1.12896	MAMDC2	+
chr19	1397115	4.03927	0.0273005	0.887347	-0.924285	GAMT	-	exon		3'UTR			CpG_Shelf_2-4kb_Upstream	promoter_-_strand	ENSG00000248015
chr9	89677490	4.03878	0.0273092	0.887347	-0.814121	ENSG00000237372	+					CpG_Shore_2kb_Downstream
chr11	61956968	4.03849	0.0273144	0.887347	-0.611976	BEST1	+	exon				CpG_Shore_2kb_Downstream
chr5	3200543	4.03846	0.0273148	0.887347	-0.666919
chr7	100477337	4.03754	0.0273313	0.887347	-0.435898	TSC22D4	-	exon	5'UTR			CpG_Shore_2kb_Upstream
chr4	4226896	4.03741	0.0273335	0.887347	-1.82418	OTOP1	-	exon	5'UTR		CpG: 138
chr1	27343262	4.03598	0.0273589	0.887347	-0.979253	SYTL1	+	exon	5'UTR
chr10	120128637	4.03572	0.0273635	0.887347	-0.59076
chr15	86612510	4.03511	0.0273744	0.887347	-0.815785	AGBL1	+
chr12	113622410	4.03419	0.0273907	0.887347	-0.88135	LINC01234	-
chr9	127578972	4.03386	0.0273966	0.887347	-0.870015			exon	5'UTR
chr5	1841137	4.03154	0.0274381	0.887347	-0.571793
chr20	61149351	-4.03118	0.0274444	0.887347	0.469964
chr3	72996389	4.03026	0.027461	0.887347	-0.460419							CpG_Shore_2kb_Upstream		promoter_+_strand	PPP4R2
chr17	78234710	4.02877	0.0274876	0.887347	-1.34619	TMEM235	+	exon					CpG_Shelf_2-4kb_Downstream
chr17	21317497	4.0284	0.0274942	0.887347	-0.650921							CpG_Shore_2kb_Downstream
chr20	611283	4.02732	0.0275135	0.887347	-0.336461							CpG_Shore_2kb_Downstream		promoter_-_strand	TCF15
chr1	3774595	4.02663	0.0275258	0.887347	-0.172107	SMIM1	+					CpG_Shore_2kb_Downstream
chr9	84856619	4.02634	0.027531	0.887347	-0.819161	NTRK2	+
chr19	18961656	4.02519	0.0275517	0.887347	-0.933717
chr10	49243221	4.0251	0.0275533	0.887347	-0.743891
chr10	100751219	4.02505	0.0275541	0.887347	-0.206809	PAX2	+					CpG_Shore_2kb_Downstream
chr17	81041190	4.02235	0.0276026	0.887347	-0.529558	BAIAP2	+
chr8	25689094	4.0223	0.0276036	0.887347	-0.238594
chr17	78883562	4.02091	0.0276285	0.887347	-0.992209	TIMP2	-
chr1	53320092	4.01987	0.0276474	0.887347	-0.54704	LRP8	-
chr1	148869438	4.01883	0.0276662	0.887347	-1.03192
chr6	170434139	4.01881	0.0276664	0.887347	-0.537831
[truncated: 1,839 more rows]

## Sheet: Supplementary Table 5
Supplementary Table 5. Top-10 enriched functional annotations for differentiated 5hmC sites (nominal P<0.05) with reduced NSC expression showing genes associated with functional annotations.
Category	Term	Count	%	PValue	Genes	List Total	Pop Hits	Pop Total	Fold Enrichment	Bonferroni	FDR
GO Term (CC)	GO:0005886 "plasma membrane"	458	28.15	1.29684e-14	ITSN2, CNTFR, SERPINE1, SLC4A1, SLC4A2, PREX1, GNAT1, WLS, UNC5A, COL23A1, PRKCD, SYTL1, PRKCA, GABRG3, BCR, SIGIRR, ADCY9, CLDN3, PRKAR1B, PRKD2, TTYH3, COL13A1, MAPKAP1, CLCNKB, IL20RA, PRKCZ, C14ORF180, FLRT1, PLCG2, GSG1L, PIP5K1C, SLC19A1, GPR12, ABCA7, MYMK, GRIN2D, SLC6A6, SLC6A7, SLC6A9, HNRNPF, LYPD6B, TRIP6, KCNC1, CLTB, LRRC3, HIF3A, SHB, LITAF, SLC6A3, ASGR2, RNF157, SMPD3, ADAMTSL1, …	1358	5066	20472	1.36289	9.61231e-12	9.11678e-12
GO Term (CC)	GO:0048471 "perinuclear region of cytoplasm"	94	5.7775	7.66499e-09	PTPRR, ANKRD13D, PLEKHF1, WWC1, ATN1, AATK, MLC1, CIB1, ATP2A1, ASGR2, PREX1, CDH1, GPER1, NCS1, PDE4A, SCN5A, SBF2, CTSB, KCNH2, APC2, PPP1R16B, EPHA5, KIRREL1, ANXA2, SLC2A10, MAP1S, STX8, PDE4D, SERPINF1, PLEKHG5, PDE4C, PRKCD, APLP1, STX7, PRKCA, ACTN4, TNFRSF1B, EPN3, DNM3, INF2, RNF207, NOS1AP, RARA, CDH13, PTGES, PLEC, PRKN, BRSK2, SRCAP, CNP, CABP7, ITPR1, SLC1A3, GDPD3, PRKCZ, RASIP1, PP…	1358	763	20472	1.85722	5.67208e-06	1.98344e-06
GO Term (CC)	GO:0005925 "focal adhesion"	62	3.81069	8.46419e-09	NRP1, ITGB4, ARPC1B, FHL2, FHL3, SLC4A2, ALKBH6, SYNE2, MRC2, AKAP12, LASP1, ADGRE5, CAPN5, PPFIA1, SCARF2, TNS3, TNS1, ACTN1, AFAP1, ACTN4, PEAK3, MYH9, CDH13, ARHGEF7, CD44, EPHA2, PLEC, SDC4, FBLIM1, ASAP3, NEDD9, PIK3R2, CORO1B, SLC9A1, SLC9A3R2, ARHGAP22, CNN2, TSPAN9, GNA12, FLRT1, PTK2B, FLNB, FLNC, PIP5K1C, CLASP1, PAK4, MAPK3, GSN, SORBS2, PTPN12, PARVB, ARPC5, CORO2B, ARHGAP31, UBOX5, M…	1358	424	20472	2.20438	6.26348e-06	1.98344e-06
KEGG Pathway	hsa04360 "Axon guidance"	38	2.33559	7.3618e-09	SEMA5B, NRP1, SEMA7A, ROCK2, SEMA3D, SEMA3B, PIK3R2, NTN1, PRKCZ, ABLIM1, ABLIM2, RGS3, PLCG2, ABL1, PLXNC1, SRGAP3, EPHB2, CAMK2G, EPHB1, PLXNA4, EPHB3, WNT4, MAPK3, PAK4, EPHA5, NTNG2, UNC5A, EPHA8, SEMA4C, PRKCA, BMP7, RGMA, EFNA2, CDK5, PLXNB2, EPHA3, NGEF, EPHA2	596	182	8156	2.85722	2.34841e-06	2.06867e-06
GO Term (CC)	GO:0043005 "neuron projection"	57	3.50338	1.3381e-08	NRP1, TENM3, CPNE5, MAST1, ABAT, CIB1, KIF17, SLC6A3, PTPRF, EPHB2, EPHB1, EPHB3, EPHA5, EPHA8, ACTN4, HTR3B, GABRG3, ANK1, RGMA, SSTR5, KCNQ1, CDH13, NSMF, PRR12, ARHGEF7, SHANK2, EPHA3, SHANK1, EPHA2, RTN4R, PRKN, OPRD1, CHRNA4, SLC1A3, RASGRP2, CYGB, CACNA1H, CACNA1G, CACNA1I, WRN, SV2C, GNA12, KCNN1, FLNB, CAMK2G, GABBR2, SLC12A5, LGI3, DTNBP1, ATP2B4, LSM4, TH, CDK5, TAOK2, ATP13A2, NF2, IGS…	1358	379	20472	2.26723	9.90191e-06	2.35172e-06
GO Term (MF)	GO:0003779 "actin binding"	55	3.38045	1.28719e-08	ARPC1B, INPPL1, LMOD1, FHL3, SYNE2, PPP1R9B, LASP1, CAPZB, PSTPIP2, SYNPO, TNS1, PLEKHG3, MAP1S, ACTN1, AFAP1, ACTN4, SPTB, INF2, DAAM2, KCNMA1, TNNT3, MYH9, PLEC, PRKN, SPTBN5, ACTR3B, CNN2, ABLIM1, ABLIM2, TNNI1, MYH14, EPS8L1, TNNI2, FLNB, EPS8L2, PDLIM4, SPTBN2, GSN, DMTN, MICAL3, MYO9B, PARVB, ARPC5, FHDC1, CORO2B, MYO1E, MARCKS, SMTN, MYO1C, SPATA32, MYO15A, GIPC1, TRPV4, SPIRE2, NF2	1325	339	18811	2.30335	1.7467e-05	1.73255e-05
GO Term (CC)	GO:0070161 "anchoring junction"	64	3.93362	1.68218e-07	DAGLA, KCNC1, GRIK5, ATN1, FAIM2, GPER1, SH3PXD2B, NCS1, DLGAP3, ERC2, LZTS1, DACT1, KCNAB2, GABRG3, SORCS2, BCR, OLFM1, OLFM2, DOK7, NOS1AP, NSMF, PRR12, DSCAML1, SHANK2, SHANK1, GRID2IP, PRKN, CTBP2, CHRNA4, CPLX2, RASGRP2, TMEM240, ABR, SYNGR1, SV2C, IGF2BP1, SYNDIG1, OTOF, GSG1L, STXBP5, CACNG2, LRRC4B, KCNJ4, LGI1, NTRK2, GABBR2, PTPRN2, SYT2, LGI3, SEMA4C, DTNBP1, ATP2B2, SYT7, GRIN2D, LRFN…	1358	481	20472	2.00584	0.000124473	1.97095e-05
GO Term (CC)	GO:0043025 "neuronal cell body"	57	3.50338	1.62387e-07	CNTNAP2, NRP1, MAST1, CIB1, KNDC1, SLC6A3, PTPRF, IGF1R, PPP1R9B, RPTOR, AKAP12, TNN, TIMP2, GNAT1, EPHB2, EPHA5, MAP1S, KCND3, ADRA2C, TNFRSF1B, SRCIN1, OLFM1, KCNQ1, ADNP, ARHGEF7, SHANK2, RTN4R, CHRNA4, CACNA1A, SLC1A3, ATP1A2, LRP8, RAP1GAP, CYGB, GNA12, IGF2BP1, ABL1, PTK2B, KCNN1, FLNB, CKB, CNNM4, SPTBN2, SKOR1, SLC12A5, SLC31A1, SRD5A1, TXNRD2, DTNBP1, ZNF804A, SORBS2, BAIAP2, DHODH, SLC6…	1358	407	20472	2.11126	0.000120159	1.97095e-05
GO Term (MF)	GO:0051015 "actin filament binding"	41	2.51998	4.83072e-08	SPTBN5, ARPC1B, ESPN, RCSD1, SYNE3, ACTR3B, CORO1B, SYNE2, PPP1R9B, ABLIM1, LASP1, ABLIM2, CAPZB, PSTPIP2, MYO18A, ABL1, MYH14, FLNB, MYH11, FLNC, CTNNA2, VILL, PKNOX2, SPTBN2, GSN, DMTN, MAP1S, ACTN1, MICAL3, MYO9B, ACTN4, ARPC5, CORO2B, SPTB, MYO1E, MARCKS, MYO1C, MYO15A, TRPV4, MYH9, ADSS1	1325	225	18811	2.58701	6.55508e-05	3.25108e-05
GO Term (CC)	GO:0098685 "Schaffer collateral - CA1 synapse"	21	1.29072	7.66675e-07	NTNG2, ITPR1, DTNBP1, WNT7A, PLAT, BAIAP2, PRKCZ, BCR, AKAP12, ABR, CAPZB, PRKAR1B, CDK5, GIPC1, CDH11, GSG1L, STXBP5, CACNG2, APBA2, INA, SHANK1	1358	87	20472	3.63882	0.000567179	7.69961e-05

## Sheet: Supplementary Table 6
Supplementary Table 6. Nominally significant (P<0.05) associations identified by paired t-test between patients with BD and their unaffected siblings in NSCs for log2 (CPM) 5hmC.
Chromosome	5hmC Site Position (bp; hg38)	t-Statistic (case vs. sib)	P-Value	Gene	Exon	5' UTR	3' UTR	CpG Island	CpG Shore	CpG Shelf	Promoter	Promoter Gene
chr8	73370576	45329.7	1.40442e-05	ENSG00000253235	exon
chr12	111293515	-26483.4	2.40385e-05	CUX2	exon
chr7	128168609	21764.7	2.92501e-05					CpG: 169
chr22	37911350	-20650.1	3.08289e-05	MICALL1
chr4	3462651	17877.8	3.56094e-05						CpG_Shore_2kb_Upstream		promoter_+_strand	DOK7
chr6	37539622	-17351.3	3.669e-05							CpG_Shelf_2-4kb_Downstream
chr20	62980185	-16616.5	3.83125e-05						CpG_Shore_2kb_Upstream
chr19	50661877	-11357	5.60551e-05	SHANK1	exon		3'UTR		CpG_Shore_2kb_Upstream	CpG_Shelf_2-4kb_Downstream
chr1	234206319	9991.62	6.37154e-05
chr18	48547816	9336.21	6.81882e-05	CTIF
chr1	10990547	9336.21	6.81882e-05
chr1	246607802	6619.61	9.61718e-05	ENSG00000225300	exon
chr13	111476892	6619.61	9.61718e-05
chr20	63809077	6619.61	9.61718e-05	ZBTB46				CpG: 20	CpG_Shore_2kb_Downstream
chr19	787848	-5461.66	0.000116562
chr3	129530383	-5338.5	0.000119251	RHO
chr11	64165217	3953.93	0.000161009	MACROD1					CpG_Shore_2kb_Upstream
chr12	6376882	-3832.83	0.000166097
chr16	85395915	-3816.45	0.000166809
chr17	37064316	3772.36	0.000168759
chr5	172092526	-3568.06	0.000178422	STK10	exon
chr3	57006535	3254.96	0.000195584
chr21	44750491	-2753.2	0.000231229	ENSG00000289144	exon				CpG_Shore_2kb_Downstream
chr16	57803281	-2713.78	0.000234588	ENSG00000187185	exon				CpG_Shore_2kb_Downstream		promoter_-_strand	KIFC3
chr5	173413243	-2546.12	0.000250036	ENSG00000253968
chr7	96035427	-2499.66	0.000254682	DYNC1I1
chr15	57551989	-2480.3	0.000256671
chr1	198828121	-2115.98	0.000300862	MIR181A1HG
chr5	173298761	-2108.59	0.000301918
chr22	45227715	1987.51	0.00032031	KIAA0930
chr14	104110570	-1801.83	0.000353319	ASPG
chr14	100569572	-1774.69	0.000358721	BEGAIN					CpG_Shore_2kb_Downstream
chr7	22802144	-1767.96	0.000360086
chr11	2789644	1677.04	0.000379609	KCNQ1					CpG_Shore_2kb_Upstream
chr17	40543738	-1629.3	0.000390733
chr9	38057655	-1629.3	0.000390733	SHB
chr22	46062374	1620.74	0.000392796						CpG_Shore_2kb_Downstream
chr22	23849427	1536.04	0.000414456					CpG: 42
chr5	2295785	-1474.51	0.000431751
chr19	49097617	-1430.97	0.000444886	SNRNP70
chr17	82171470	-1430.97	0.000444886	CCDC57
chr17	5097797	-1430.97	0.000444886					CpG: 78
chr9	136353335	-1422.03	0.000447684	GPSM1					CpG_Shore_2kb_Downstream
chr22	42079139	1358.59	0.000468587	PHETA2	exon		3'UTR		CpG_Shore_2kb_Upstream		promoter_+_strand	SMDT1
chr4	6386050	-1346.69	0.000472728	PPP2R2C
chr4	148049468	-1346.69	0.000472728	ARHGAP10
chr1	2052401	-1340.25	0.000475001	PRKCZ					CpG_Shore_2kb_Downstream
chr4	7193607	-1326.23	0.000480023	SORCS2				CpG: 153
chr17	81331651	-1308.4	0.000486563								promoter_-_strand	TMEM105
chr4	184383642	1279.57	0.000497527
chr8	143023123	-1251.78	0.000508573						CpG_Shore_2kb_Upstream	CpG_Shelf_2-4kb_Downstream
chr10	71774432	-1251.78	0.000508573	CDH23					CpG_Shore_2kb_Downstream		promoter_-_strand	VSIR
chr3	193960523	-1213.58	0.000524579	LINC02026
chr10	70760842	1193.12	0.000533578	ADAMTS14	exon
chr2	241199061	1193.12	0.000533578	ANO7					CpG_Shore_2kb_Upstream
chr18	79953357	1193.12	0.000533578						CpG_Shore_2kb_Downstream
chr22	40679557	-1186.89	0.000536375	MCHR1	exon	5'UTR
chr18	78174887	1177.92	0.000540461
chr16	642807	1101.26	0.000578084	MCRIP2	exon				CpG_Shore_2kb_Downstream	CpG_Shelf_2-4kb_Upstream
chr10	111756600	-1082.86	0.000587908
chr3	180102408	-1057.85	0.000601803
chr1	2543245	1039.77	0.000612271	ENSG00000272449						CpG_Shelf_2-4kb_Upstream
chr22	36797632	-999.576	0.000636889
chr20	63743051	-948.472	0.000671205	SLC2A4RG	exon		3'UTR		CpG_Shore_2kb_Downstream	CpG_Shelf_2-4kb_Upstream
chr17	39663092	-889.777	0.000715482	STARD3	exon		3'UTR
chr5	175879062	-866.927	0.00073434	CPLX2	exon
chr9	11415	844.334	0.00075399								promoter_+_strand	DDX11L5
chr5	179624340	775.987	0.000820399	HNRNPH1	exon	5'UTR		CpG: 158
chr15	74430952	-749.949	0.000848883	ENSG00000286696	exon					CpG_Shelf_2-4kb_Upstream
chr17	81890756	-749.949	0.000848883	ALYREF	exon			CpG: 184		CpG_Shelf_2-4kb_Downstream	promoter_+_strand	ANAPC11
chr2	1675927	-749.949	0.000848883	PXDN
chr14	51508129	748.965	0.000849999	FRMD6
chr8	22596417	721.961	0.000881792	ENSG00000248235	exon		3'UTR			CpG_Shelf_2-4kb_Upstream
chr5	166972780	714.031	0.000891585
chr5	5495258	704.116	0.00090414					CpG: 17
chr15	74300550	696.033	0.00091464	ENSG00000280309	exon
chr3	119625925	-688.276	0.000924948	PLA1A
chr2	160952632	-654.238	0.00097307
chr5	93646	643.704	0.000988994	PLEKHG4B					CpG_Shore_2kb_Downstream
chr3	129046930	643.599	0.000989156					CpG: 140
chr9	38675363	-638.571	0.000996944
chr7	151122960	-610.147	0.00104339	AGAP3	exon		3'UTR	CpG: 66		CpG_Shelf_2-4kb_Upstream
chr6	35470479	606.873	0.00104902	RPL10A					CpG_Shore_2kb_Downstream		promoter_+_strand	MIR7111
chr1	223993820	-606.747	0.00104923	SEPTIN7P13					CpG_Shore_2kb_Downstream		promoter_+_strand	ENSG00000278467
chr19	10226652	-606.679	0.00104935	S1PR2					CpG_Shore_2kb_Downstream	CpG_Shelf_2-4kb_Upstream
chr22	49983925	592.612	0.00107426					CpG: 80
chr4	2266372	-589.142	0.00108059							CpG_Shelf_2-4kb_Downstream
chr4	8894444	-589.142	0.00108059					CpG: 249
chr2	240291405	562.839	0.00113109
chr2	231393900	562.839	0.00113109	ENSG00000224376	exon				CpG_Shore_2kb_Upstream
chr22	37416802	537.502	0.0011844	ELFN2						CpG_Shelf_2-4kb_Upstream
chr20	48751143	534.672	0.00119067	PREX1
chr11	44982891	512.487	0.00124222
chr17	66284184	-503.011	0.00126562
chr1	3458509	-485.43	0.00131145	ARHGEF16						CpG_Shelf_2-4kb_Downstream
chr11	2035568	-480.494	0.00132493
chr7	4744036	458.778	0.00138764	FOXK1					CpG_Shore_2kb_Upstream	CpG_Shelf_2-4kb_Upstream
chr9	134341573	458.778	0.00138764	RXRA						CpG_Shelf_2-4kb_Downstream
chr11	61556735	458.778	0.00138764	SYT7
chr19	44800438	453.965	0.00140235	CBLC	exon
chr19	18870940	453.965	0.00140235	GDF1					CpG_Shore_2kb_Downstream	CpG_Shelf_2-4kb_Downstream
chr4	18440891	453.965	0.00140235	ENSG00000286046
chr21	43809623	453.965	0.00140235	AATBC	exon
chr3	72447654	450.397	0.00141346					CpG: 116
chr4	2393788	-446.888	0.00142456	ZFYVE28
chr2	158795295	-436.702	0.00145779								promoter_+_strand	DAPL1
chr2	43047541	-428.785	0.0014847
chr7	5495086	428.4	0.00148604	FBXL18				CpG: 28
chr3	16414860	419.453	0.00151774	RFTN1
chr21	44118110	-415.418	0.00153248	PWP2
chr14	88551270	410.573	0.00155056	PTPN21	exon	5'UTR			CpG_Shore_2kb_Upstream	CpG_Shelf_2-4kb_Upstream	promoter_+_strand	ENSG00000258789
chr17	39719520	410.339	0.00155145	ERBB2						CpG_Shelf_2-4kb_Upstream
chr20	700291	401.007	0.00158755
chr3	150883821	401.007	0.00158755	MINDY4B
chr1	2555950	390.683	0.0016295	TNFRSF14-AS1	exon	5'UTR					promoter_+_strand	TNFRSF14
chr7	360591	-379.97	0.00167544					CpG: 18	CpG_Shore_2kb_Upstream
chr7	377662	-373.301	0.00170537						CpG_Shore_2kb_Upstream	CpG_Shelf_2-4kb_Downstream
chr11	1871467	-362.607	0.00175567	LSP1					CpG_Shore_2kb_Downstream
chr9	134699211	-362.607	0.00175567	COL5A1
chr19	2302522	361.175	0.00176263	ENSG00000273734				CpG: 46
chr9	67066355	-356.223	0.00178714	CNTNAP3P2
chr20	63863804	-354.875	0.00179392	ENSG00000268858	exon				CpG_Shore_2kb_Upstream
chr2	16030453	-344.041	0.00185041	ENSG00000226764
chr14	92515321	-342.08	0.00186102	RIN3	exon				CpG_Shore_2kb_Downstream
chr9	136530223	341.318	0.00186518	NOTCH1					CpG_Shore_2kb_Upstream	CpG_Shelf_2-4kb_Upstream
chr10	118246800	-338.149	0.00188265	ENSG00000238276	exon
chr1	203556554	338.041	0.00188325
chr11	65650628	-328.742	0.00193653	SIPA1	exon				CpG_Shore_2kb_Upstream	CpG_Shelf_2-4kb_Downstream
chr3	113699040	-328.042	0.00194066							CpG_Shelf_2-4kb_Downstream
chr4	2127320	319.03	0.00199548	POLN
chr22	37284640	316.183	0.00201345	CYTH4
chr8	22056976	316.183	0.00201345	DMTN	exon	5'UTR		CpG: 20
chr2	209771463	315.953	0.00201491						CpG_Shore_2kb_Upstream		promoter_+_strand	UNC80
chr16	81731069	315.953	0.00201491
chr15	37130641	-314.825	0.00202213
chr12	3055894	-314.486	0.00202431
chr17	7560529	-311.035	0.00204677	TNFSF13					CpG_Shore_2kb_Upstream
chr3	71506056	307.962	0.0020672	FOXP1
chr19	14204572	-302.695	0.00210317	ADGRL1					CpG_Shore_2kb_Upstream
chr16	8984135	-299.87	0.00212298
chr22	35227233	-299.648	0.00212455	LINC01399
chr10	95295374	-299.648	0.00212455					CpG: 33
chr7	101418926	295.158	0.00215687	COL26A1
chr7	150901414	-292.738	0.0021747
chr13	113016764	292.696	0.00217501	MCF2L				CpG: 21		CpG_Shelf_2-4kb_Downstream
chr20	45344517	-291.651	0.00218281	SDC4						CpG_Shelf_2-4kb_Upstream
chr1	147495311	289.32	0.00220039	LINC00624
chr4	6727184	288.626	0.00220569					CpG: 22	CpG_Shore_2kb_Upstream
chr8	127926469	288.626	0.00220569	PVT1
chr22	23849430	288.626	0.00220569					CpG: 42
chr11	472481	288.626	0.00220569	PTDSS2					CpG_Shore_2kb_Upstream
chr17	27808636	288.626	0.00220569	ENSG00000266202
chr19	556135	283.262	0.00224745
chr19	17969397	-282.693	0.00225197	KCNN1					CpG_Shore_2kb_Downstream
chr7	98491047	-282.693	0.00225197
chr19	3226233	-282.693	0.00225197	CELF5					CpG_Shore_2kb_Downstream	CpG_Shelf_2-4kb_Upstream
chr1	1437365	-282.693	0.00225197	VWA1	exon				CpG_Shore_2kb_Upstream
chr6	37785533	282.596	0.00225275
chr13	113747302	-281.777	0.00225929
chr17	68101232	280.351	0.00227079	ENSG00000265055	exon				CpG_Shore_2kb_Upstream		promoter_+_strand	LINC00674
chr9	126673611	279.242	0.0022798	LMX1B					CpG_Shore_2kb_Downstream
chr11	118917822	-275.988	0.00230669	BCL9L
chr2	44951189	274.904	0.00231578						CpG_Shore_2kb_Upstream	CpG_Shelf_2-4kb_Upstream
chr2	130726955	-265.267	0.00239991						CpG_Shore_2kb_Upstream
chr12	12467027	-264.714	0.00240492	BORCS5	exon		3'UTR
chr8	22066289	-264.341	0.00240832	DMTN					CpG_Shore_2kb_Upstream
chr19	53095359	-260.968	0.00243944	ZNF160
chr18	66798507	255.75	0.00248922
chr3	130649199	255.341	0.0024932	COL6A6	exon
chr11	709292	255.112	0.00249544	EPS8L2						CpG_Shelf_2-4kb_Upstream
chr9	36818349	255.112	0.00249544	ENSG00000287514
chr2	45010806	255.112	0.00249544						CpG_Shore_2kb_Downstream	CpG_Shelf_2-4kb_Upstream
chr4	8270312	255.112	0.00249544	HTRA3	exon			CpG: 97
chr1	156505024	-253.508	0.00251123	ENSG00000289593	exon				CpG_Shore_2kb_Upstream	CpG_Shelf_2-4kb_Downstream
chr22	38864797	-253.173	0.00251455	CBX6	exon		3'UTR		CpG_Shore_2kb_Upstream
chr9	136148818	251.115	0.00253515
chr7	71442838	-249.765	0.00254886	GALNT17
chr2	2543509	-247.805	0.00256902
chr12	51851804	-247.339	0.00257386	FIGNL2-DT						CpG_Shelf_2-4kb_Downstream
chr9	136796087	-244.502	0.00260372	ENSG00000272896						CpG_Shelf_2-4kb_Upstream	promoter_+_strand	CCDC183
chr19	2905528	243.936	0.00260976	ZNF57
chr2	241771445	243.936	0.00260976					CpG: 39
chr19	29909784	243.017	0.00261963
chr5	172958426	243.017	0.00261963	ENSG00000204758	exon				CpG_Shore_2kb_Upstream		promoter_+_strand	RPL26L1
chr11	119024777	-242.349	0.00262686	SLC37A4	exon		3'UTR
chr16	9755752	-238.026	0.00267457	GRIN2A	exon		3'UTR
chr3	125062938	-238.026	0.00267457	ENSG00000288022	exon
chr2	172162555	-238.026	0.00267457	ENSG00000232555
chr1	159855101	-236.652	0.0026901	VSIG8				CpG: 87			promoter_-_strand	SNHG28
chr20	50641834	235.882	0.00269888
chr20	63322802	235.311	0.00270542	COL20A1				CpG: 39		CpG_Shelf_2-4kb_Downstream
chr1	203217899	234.672	0.00271279	CHIT1	exon
chr3	126524844	234.254	0.00271763	CHST13					CpG_Shore_2kb_Downstream
chr7	452573	-232.073	0.00274318						CpG_Shore_2kb_Downstream	CpG_Shelf_2-4kb_Upstream
chr17	2352115	-230.227	0.00276517	SGSM2
chr19	1008003	228.328	0.00278817	GRIN3B				CpG: 326		CpG_Shelf_2-4kb_Downstream
chr6	7672629	-224.816	0.00283172
chr4	185614580	-223.325	0.00285062	SORBS2
chr17	18226718	-221.36	0.00287593	LLGL1					CpG_Shore_2kb_Downstream
chr19	4776975	-217.742	0.00292372	MIR7-3HG
chr3	52298665	217.141	0.0029318	GLYCTK-AS1
chr14	100712484	-214.768	0.0029642							CpG_Shelf_2-4kb_Downstream
chr15	75735444	-214.401	0.00296928	DNM1P35						CpG_Shelf_2-4kb_Upstream
chr11	64025811	-213.303	0.00298456	MACROD1
chr10	115573216	-213.303	0.00298456	ATRNL1
chr17	16666999	-212.82	0.00299133	NEK4P2	exon			CpG: 57
chr2	127104972	-211.92	0.00300403	BIN1					CpG_Shore_2kb_Upstream
chr22	17367681	210.386	0.00302593	CECR2					CpG_Shore_2kb_Upstream
chr10	129396208	-210.357	0.00302635
chr1	1179498	-209.043	0.00304538	TTLL10-AS1	exon
chr7	101903170	208.582	0.00305211	CUX1
chr1	54248285	-208.579	0.00305216	SSBP3
chr1	228035758	207.895	0.00306219	WNT3A					CpG_Shore_2kb_Upstream
chr17	8080390	207.475	0.0030684	ENSG00000214999	exon				CpG_Shore_2kb_Downstream
chr2	130819400	205.746	0.00309418
chr8	140239053	-205.407	0.00309928	TRAPPC9
chr3	43924124	-202.417	0.00314507
chr19	39970020	-199.453	0.00319181						CpG_Shore_2kb_Upstream
chr17	73366336	197.914	0.00321662	SDK2
chr16	71849	-197.483	0.00322364	RHBDF1					CpG_Shore_2kb_Upstream
chr8	141368224	197.452	0.00322415								promoter_-_strand	GPR20
chr14	100586614	-197.184	0.00322853						CpG_Shore_2kb_Upstream
chr3	53114159	-196.519	0.00323945	RFT1
chr11	2305272	-196.109	0.00324622	TSPAN32
chr13	113052406	-194.862	0.00326699	MCF2L					CpG_Shore_2kb_Downstream
chr18	57015768	-194.652	0.00327052	WDR7
chr8	123156816	-194.652	0.00327052					CpG: 31		CpG_Shelf_2-4kb_Upstream	promoter_+_strand	ENSG00000287657
chr16	30787809	194.216	0.00327786						CpG_Shore_2kb_Downstream	CpG_Shelf_2-4kb_Downstream	promoter_-_strand	ZNF629
chr16	706918	-193.555	0.00328906						CpG_Shore_2kb_Downstream		promoter_+_strand	ENSG00000279255
chr5	174910665	-192.744	0.0033029
chr7	100691644	189.228	0.00336427	GIGYF1					CpG_Shore_2kb_Upstream
chr12	113856187	-189.16	0.00336548	RBM19
chr11	117833554	-188.981	0.00336866	FXYD6-FXYD2							promoter_+_strand	ENSG00000254528
chr20	43721343	-188.353	0.00337989
chr10	114490003	-183.013	0.00347852	ABLIM1
chr9	131017190	-182.776	0.00348302	LAMC3
chr8	1417058	-182.324	0.00349165					CpG: 24
chr16	70700709	-182.052	0.00349687	VAC14
chr21	22575201	-182.052	0.00349687
chr17	79191616	-181.22	0.00351294	RBFOX3
chr8	143891354	-179.595	0.00354472	ENSG00000288096					CpG_Shore_2kb_Upstream
chr7	98841883	-179.057	0.00355537
chr6	16306022	178.875	0.00355898	ATXN1	exon		3'UTR
chr7	100602452	175.06	0.00363655	PCOLCE	exon	5'UTR			CpG_Shore_2kb_Upstream
chr12	128265453	172.772	0.0036847						CpG_Shore_2kb_Upstream
chr14	99202788	172.192	0.00369712	BCL11B
chr2	122229671	-171.578	0.00371035	ENSG00000286481
chr19	2273948	-171.153	0.00371956	ENSG00000273734				CpG: 35	CpG_Shore_2kb_Upstream	CpG_Shelf_2-4kb_Downstream
chr17	80024069	-167.13	0.00380909	ENSG00000261978				CpG: 23
chr3	13793172	166.639	0.00382032
chr5	173963890	165.557	0.00384527
chr11	120225555	-164.037	0.00388089	OAF
chr17	42553743	-161.975	0.0039303	HSD17B1	exon			CpG: 131
chr14	104342094	161.193	0.00394938
chr7	101734226	-159.495	0.00399143
chr22	36459422	-158.323	0.00402095
chr5	1098976	157.716	0.00403645	SLC12A7					CpG_Shore_2kb_Upstream
chr12	117099924	156.979	0.0040554	TESC-AS1					CpG_Shore_2kb_Downstream		promoter_-_strand	TESC
chr11	128888110	-156.507	0.00406763							CpG_Shelf_2-4kb_Upstream
chr6	44072141	-156.507	0.00406763	ENSG00000231881	exon				CpG_Shore_2kb_Upstream
chr12	3263525	-155.093	0.00410471	TSPAN9
chr20	61763471	-155.093	0.00410471	CDH4
chr16	88755755	154.53	0.00411965	PIEZO1					CpG_Shore_2kb_Downstream
chr1	17597390	-154.32	0.00412528	ARHGEF10L
chr1	32695222	154.278	0.00412638	SYNC	exon
chr9	133533735	153.661	0.00414296	ADAMTSL2					CpG_Shore_2kb_Upstream
chr8	21860953	153.661	0.00414296
chr9	136551812	153.661	0.00414296
chr9	16218317	153.661	0.00414296	C9orf92
chr5	1563927	153.661	0.00414296
chr1	73491829	-152.622	0.00417115
chr22	31945562	-152.468	0.00417536	YWHAH	exon		3'UTR		CpG_Shore_2kb_Downstream		promoter_-_strand	YWHAH-AS1
chr15	80605363	-152.238	0.00418168
chr11	61764807	-151.529	0.00420125	MYRF
chr17	29613394	150.851	0.00422014	ANKRD13B	exon			CpG: 129		CpG_Shelf_2-4kb_Upstream
chr19	55342434	150.331	0.00423472	KMT5C						CpG_Shelf_2-4kb_Upstream
chr16	86580108	150.197	0.0042385	FOXL1	exon		3'UTR	CpG: 154		CpG_Shelf_2-4kb_Downstream
chr2	188949220	149.866	0.00424785
chr3	65154298	149.866	0.00424785
chr1	167504064	-149.589	0.00425573	CD247
chr2	10302227	-148.675	0.0042819	ENSG00000285872	exon			CpG: 175			promoter_+_strand	HPCAL1
chr8	25974932	-147.437	0.00431784	EBF2
chr2	144449246	146.267	0.00435238	ENSG00000283118
chr10	100019883	-146.017	0.00435983
chr19	3613109	145.374	0.00437911	CACTIN-AS1	exon		3'UTR	CpG: 160
chr7	150115	144.919	0.00439287	ENSG00000240859	exon				CpG_Shore_2kb_Downstream		promoter_-_strand	ENSG00000242474
chr5	170604096	-143.182	0.00444617	KCNIP1
chr17	77793472	-143.149	0.00444718						CpG_Shore_2kb_Downstream
chr1	10450261	142.937	0.00445379	CORT	exon
chr9	128688069	142.779	0.0044587						CpG_Shore_2kb_Upstream
chr12	57235790	141.962	0.00448437	NDUFA4L2	exon				CpG_Shore_2kb_Upstream	CpG_Shelf_2-4kb_Upstream
chr16	74378063	141.436	0.00450106	NPIPB15
chr1	220290395	-140.766	0.00452245
chr20	35618728	140.005	0.00454706	SPAG4	exon				CpG_Shore_2kb_Upstream	CpG_Shelf_2-4kb_Downstream
chr9	134294206	-139.926	0.0045496	LINC02247	exon
chr2	71963110	-139.278	0.00457079
chr19	54364898	138.446	0.00459824	LAIR1	exon	5'UTR
chr16	74030184	138.446	0.00459824
chr12	132285085	138.001	0.00461308	GALNT9					CpG_Shore_2kb_Upstream	CpG_Shelf_2-4kb_Upstream
chr18	56572255	137.124	0.00464257
chr3	47009907	-135.228	0.00470768					CpG: 107			promoter_+_strand	NRADDP
chr1	236702679	134.01	0.00475046	ACTN2
chr19	17210735	-132.608	0.00480066	MYO9B	exon				CpG_Shore_2kb_Upstream
chr7	157078526	132.08	0.00481986					CpG: 29
chr22	46296448	-131.868	0.00482763	GTSE1-DT	exon			CpG: 93			promoter_+_strand	GTSE1
chr1	2199379	-130.936	0.00486196		exon
chr3	128051801	-129.911	0.00490033		exon	5'UTR			CpG_Shore_2kb_Upstream		promoter_+_strand	SEC61A1
chr12	48801158	-129.455	0.00491759								promoter_-_strand	ENSG00000271547
chr3	58569714	-129.455	0.00491759	FAM107A	exon
chr9	127539688	-129.455	0.00491759	NIBAN2
chr16	89165553	-129.455	0.00491759						CpG_Shore_2kb_Upstream		promoter_+_strand	LINC02138
chr20	57593654	-129.455	0.00491759
chr18	48376543	-129.451	0.00491773	ZBTB7C
chr16	67645134	-128.469	0.00495533		exon	5'UTR		CpG: 54		CpG_Shelf_2-4kb_Upstream	promoter_+_strand	CARMIL2
chr11	64048206	-127.919	0.00497664	FLRT1
chr12	130339492	127.749	0.00498328	PIWIL1	exon	5'UTR		CpG: 218
chr1	39684066	127.749	0.00498328	HPCAL4	exon			CpG: 62
chr18	58485896	127.647	0.00498725	ALPK2
chr14	100223023	127.106	0.00500845	ENSG00000258982
chr16	750639	127.034	0.00501132							CpG_Shelf_2-4kb_Downstream
chr11	2215819	-125.941	0.00505482
chr5	168165603	-124.837	0.00509951	ENSG00000253925
chr7	26628056	-124.326	0.00512048
chr7	44146367	-124.326	0.00512048	GCK				CpG: 21	CpG_Shore_2kb_Downstream
chr8	20304533	124.229	0.00512446						CpG_Shore_2kb_Downstream		promoter_-_strand	LZTS1
chr1	203060345	-124.08	0.00513059	PPFIA4	exon
chr16	86051760	-123.752	0.00514422
chr1	1973723	-122.91	0.00517945	CFAP74
chr10	133080035	122.505	0.00519656						CpG_Shore_2kb_Downstream	CpG_Shelf_2-4kb_Upstream
chr12	124539553	-121.6	0.00523522	ENSG00000279071	exon
chr16	29291159	-121.55	0.0052374	ENSG00000284685							promoter_+_strand	ENSG00000198106
chr1	3317596	-121.202	0.00525245	ENSG00000287828
chr18	79016784	-120.688	0.00527479
chr1	1371965	120.514	0.0052824						CpG_Shore_2kb_Upstream
chr10	101310444	119.992	0.00530541						CpG_Shore_2kb_Upstream		promoter_+_strand	ENSG00000225208
chr5	176812952	-119.921	0.00530854	UNC5A					CpG_Shore_2kb_Downstream
chr1	16871181	119.833	0.00531243	ENSG00000228549	exon			CpG: 23	CpG_Shore_2kb_Upstream
chr6	6737318	-118.253	0.00538339	ENSG00000226281
chr1	33161245	-117.816	0.00540337	TRIM62					CpG_Shore_2kb_Downstream
chr2	127087603	-116.768	0.00545185	BIN1
chr17	81389258	-116.292	0.00547419	ENSG00000262877	exon				CpG_Shore_2kb_Downstream	CpG_Shelf_2-4kb_Upstream
chr8	144096130	116.244	0.00547644	CYC1	exon				CpG_Shore_2kb_Downstream
chr19	1745015	115.798	0.00549754							CpG_Shelf_2-4kb_Upstream
chr4	7322422	-115.596	0.00550715	SORCS2
chr1	1293809	-115.596	0.00550715	ACAP3				CpG: 590		CpG_Shelf_2-4kb_Upstream
chr22	45238829	-115.209	0.00552562	KIAA0930					CpG_Shore_2kb_Upstream
chr22	38404096	114.945	0.00553834
chr12	124463468	114.639	0.00555313	NCOR2						CpG_Shelf_2-4kb_Upstream
chr17	34626705	114.639	0.00555313	TMEM132E	exon			CpG: 77
chr5	176646874	114.438	0.00556286						CpG_Shore_2kb_Upstream		promoter_+_strand	TSPAN17
chr21	45543013	114.438	0.00556286	SLC19A1				CpG: 159
chr12	124631290	114.438	0.00556286
chr20	2653950	114.438	0.00556286	NOP56					CpG_Shore_2kb_Downstream		promoter_+_strand	SNORD110
chr17	75549407	114.438	0.00556286	LLGL2
chr15	79100146	114.438	0.00556286
chr1	11865230	114.367	0.00556633
chr1	4027718	-114.324	0.00556842
chr11	69819826	-114.324	0.00556842					CpG: 264			promoter_-_strand	FGF3
chr8	102529050	-114.181	0.00557539	ENSG00000253633
chr2	237628164	-114.181	0.00557539	LRRFIP1				CpG: 124
chr20	62633730	114.015	0.0055835	ENSG00000232121	exon						promoter_+_strand	ENSG00000229882
chr11	126336763	-113.961	0.00558615	DCPS	exon
chr20	46872773	-113.691	0.0055994
chr11	1653653	-113.537	0.00560701						CpG_Shore_2kb_Downstream
chr11	70181463	-113.42	0.0056128	ANO1
chr5	135485068	-113.049	0.00563124							CpG_Shelf_2-4kb_Upstream
chr2	29250081	-111.607	0.00570398	ALK
chr7	1457492	-111.58	0.00570536	MICALL2					CpG_Shore_2kb_Upstream
chr15	64607940	111.258	0.00572185	ZNF609
chr18	10115893	-110.599	0.00575594	ENSG00000265554
chr18	12407171	-110.384	0.00576717						CpG_Shore_2kb_Upstream		promoter_+_strand	PRELID3A
chr2	234334329	-110.337	0.00576964
chr5	150412769	-110.113	0.00578138	CD74	exon	5'UTR
chr6	6678648	109.85	0.00579518
chr1	201426612	-109.684	0.00580395	TNNI1
chr4	1778673	-109.528	0.00581224
chr2	60504256	-108.819	0.0058501	BCL11A
chr16	86441494	-108.449	0.00587005
chr1	172314731	-108.05	0.00589174	DNM3
chr10	76632337	-107.845	0.00590294
chr22	19987556	106.611	0.00597124	ARVCF					CpG_Shore_2kb_Downstream
chr12	6773401	106.498	0.00597761	LAG3					CpG_Shore_2kb_Upstream
chr11	34181531	-106.055	0.00600255	ABTB2
chr16	17411919	105.507	0.0060337	XYLT1
chr5	134087342	105.05	0.00605997
chr20	47317421	-104.93	0.00606693	ZMYND8
chr18	48826939	104.219	0.00610827	ENSG00000267764
chr12	6554515	103.361	0.00615902	IFFO1					CpG_Shore_2kb_Upstream
chr9	127179466	103.361	0.00615902	RALGPS1
chr13	102694457	103.361	0.00615902	METTL21C	exon
chr3	10142880	103.199	0.00616869	VHL	exon				CpG_Shore_2kb_Downstream
chr8	142182672	-102.664	0.00620083	ENSG00000287332
chr10	69912365	102.549	0.00620775	COL13A1
chr19	43638927	-102.28	0.00622407	CADM4					CpG_Shore_2kb_Upstream
chr3	149352709	102.031	0.0062393
chr2	165031642	101.731	0.00625769	ENSG00000236283
chr11	64001219	101.407	0.00627766	MACROD1	exon				CpG_Shore_2kb_Downstream
chr16	89248300	101.19	0.00629112						CpG_Shore_2kb_Downstream
chr7	100655996	101.19	0.00629112	ACTL6B					CpG_Shore_2kb_Upstream
chr17	48592669	101.114	0.00629588	HOXB5					CpG_Shore_2kb_Upstream	CpG_Shelf_2-4kb_Upstream
chr2	201972300	101.114	0.00629588
chr1	10938905	-101.042	0.00630032
chr5	139526484	-100.84	0.00631297		exon	5'UTR
chr19	55374576	-100.581	0.00632919							CpG_Shelf_2-4kb_Upstream
chr7	56052850	-100.412	0.00633986	CCT6A					CpG_Shore_2kb_Downstream
chr19	14381134	99.8929	0.00637281								promoter_+_strand	ADGRE5
chr19	17680553	99.8929	0.00637281	UNC13A					CpG_Shore_2kb_Downstream
chr5	179320025	-99.8204	0.00637744	ADAMTS2
chr20	36308103	-99.8036	0.00637851						CpG_Shore_2kb_Downstream
chr4	153001062	99.7715	0.00638056
chr17	9149369	-99.6306	0.00638959	NTN1
chr17	72237379	-98.7851	0.00644427
chr10	117241974	-98.4738	0.00646465	ENSG00000225936	exon			CpG: 117
chr2	95713922	-98.4008	0.00646944
chr9	136762626	98.3814	0.00647071	LCN15					CpG_Shore_2kb_Downstream
chr1	22024556	97.9519	0.00649908	LINC01635	exon				CpG_Shore_2kb_Upstream		promoter_+_strand	LINC00339
chr1	201451329	-97.6732	0.00651763
chr3	185794989	-97.4627	0.0065317	IGF2BP2
chr3	112736442	96.7254	0.00658149
chr16	85893516	-96.5315	0.00659471
chr9	133855072	-96.084	0.00662542	VAV2
chr10	102624974	-96.084	0.00662542	SUFU
chr1	205700613	-95.7375	0.00664939
chr17	50831150	-95.3825	0.00667415
chr3	13518748	-95.1732	0.00668882
chr12	132437779	95.1516	0.00669034						CpG_Shore_2kb_Upstream	CpG_Shelf_2-4kb_Downstream
chr19	1512874	-94.6621	0.00672493	ADAMTSL5					CpG_Shore_2kb_Upstream	CpG_Shelf_2-4kb_Downstream
chr14	100835464	-94.5334	0.00673408	ENSG00000258663	exon						promoter_+_strand	ENSG00000258399
chr11	62326049	-94.461	0.00673925
chr14	49636131	-94.3855	0.00674464						CpG_Shore_2kb_Downstream		promoter_-_strand	DNAAF2
chr1	1411657	94.3652	0.00674609
chr7	76304183	94.3652	0.00674609	HSPB1	exon		3'UTR		CpG_Shore_2kb_Downstream
chr7	158428924	94.3652	0.00674609	PTPRN2					CpG_Shore_2kb_Downstream
chr12	43387960	-93.8626	0.00678221	ADAMTS20
chr14	65171040	-93.7685	0.00678901
chr17	73743138	-93.4582	0.00681155	ENSG00000263574
chr14	98919944	-92.4247	0.00688771
chr9	136604254	92.2556	0.00690034
chr10	93075618	92.1793	0.00690605	ENSG00000285846					CpG_Shore_2kb_Downstream	CpG_Shelf_2-4kb_Downstream
chr1	22342304	-91.7797	0.00693611					CpG: 18
chr19	38037248	-91.5548	0.00695315	SIPA1L3
chr12	51831032	90.8102	0.00701016	ENSG00000260473
chr2	104538265	89.8699	0.0070835
chr7	1087138	-89.7966	0.00708928	GPER1	exon	5'UTR		CpG: 29
chr13	97225848	-89.7966	0.00708928	MBNL2
chr1	29810386	-89.7966	0.00708928
chr1	16697302	89.6899	0.00709771	ESPNP					CpG_Shore_2kb_Downstream	CpG_Shelf_2-4kb_Upstream
chr11	43935054	-89.6817	0.00709836	ENSG00000254409
chr19	2385272	-88.8604	0.00716397
chr5	2206738	-88.7081	0.00717627
chr6	79823065	-88.1053	0.00722536	LINC01621
chr4	1759908	87.8458	0.0072467							CpG_Shelf_2-4kb_Upstream
chr6	36793736	87.8458	0.0072467	CPNE5
chr12	109398	87.8458	0.0072467	ENSG00000256948
chr1	156691309	87.6471	0.00726313	ENSG00000237588	exon
chr1	25530927	-87.2726	0.00729429
chr12	51842013	-86.8796	0.00732729	ENSG00000260473	exon
chr17	6552540	-86.8796	0.00732729	PITPNM3						CpG_Shelf_2-4kb_Upstream
chr3	195891616	-86.8796	0.00732729	TNK2						CpG_Shelf_2-4kb_Upstream
chr3	51973629	86.3437	0.00737276	ABHD14B					CpG_Shore_2kb_Upstream
chr1	18919595	-86.0276	0.00739985	IFFO2
chr6	106099392	-85.9432	0.00740711	PRDM1	exon						promoter_+_strand	ENSG00000269919
chr11	45658861	-85.5985	0.00743694	CHST1
chr14	78858715	-85.3777	0.00745617	NRXN3
chr5	176619491	-85.0635	0.00748371					CpG: 107
chr14	77966372	85.0279	0.00748684					CpG: 37
chr22	19869408	85.0279	0.00748684
chr11	126538177	-85.0277	0.00748686	KIRREL3
chr1	209659647	-84.9911	0.00749008
chr12	6057356	84.9513	0.00749359	VWF					CpG_Shore_2kb_Upstream
chr2	120758452	-84.8661	0.00750111
chr8	101426247	-84.8221	0.007505	ENSG00000254084
chr19	51691706	84.7188	0.00751415	SPACA6P-AS						CpG_Shelf_2-4kb_Downstream	promoter_+_strand	MIR99B
chr2	121061832	-84.4927	0.00753426
chr6	15324104	84.4343	0.00753947	JARID2
chr1	12556926	-83.7386	0.0076021
chr2	23942716	83.7236	0.00760346	UBXN2A					CpG_Shore_2kb_Downstream
chr7	158032225	-83.5647	0.00761792	PTPRN2
chr5	173315866	-83.3124	0.00764099	STC2	exon		3'UTR
chr22	49601218	83.2162	0.00764982
chr22	44411000	83.166	0.00765444
chr15	99982792	-83.1374	0.00765708	ADAMTS17
chr16	86334306	-82.9387	0.00767541	LINC00917
chr10	78963979	82.9012	0.00767888	ZMIZ1-AS1
chr10	69896765	-82.788	0.00768938	COL13A1
chr19	1607296	-82.733	0.0076945						CpG_Shore_2kb_Downstream
chr15	66771490	-82.1853	0.00774577	SMAD6
chr17	27458535	-81.8339	0.00777903	KSR1					CpG_Shore_2kb_Downstream
chr2	238511004	81.8312	0.00777928	LINC01107	exon
chr4	59079329	-81.6007	0.00780126
chr19	45766463	81.395	0.00782097	SIX5	exon		3'UTR		CpG_Shore_2kb_Upstream
chr8	80147340	-81.3352	0.00782672
chr16	70289962	81.1919	0.00784053		exon	5'UTR			CpG_Shore_2kb_Downstream		promoter_-_strand	AARS1
chr1	156642716	80.7716	0.00788132	ENSG00000272405	exon				CpG_Shore_2kb_Downstream
chr15	40334117	-80.7248	0.0078859	CCDC9B	exon		3'UTR
chr16	2521109	-80.6743	0.00789083	AMDHD2	exon	5'UTR			CpG_Shore_2kb_Downstream
chr2	201232247	80.421	0.00791568
chr11	61577012	80.0747	0.00794991	SYT7						CpG_Shelf_2-4kb_Upstream
chr9	133939050	80.0742	0.00794996	VAV2
chr17	4498425	79.8346	0.00797382	ENSG00000229782					CpG_Shore_2kb_Upstream		promoter_+_strand	SPNS2
chr21	42260386	-79.7411	0.00798317	ABCG1
chr10	125162887	79.7102	0.00798626	ENSG00000282787	exon				CpG_Shore_2kb_Downstream
chr19	15309943	79.616	0.00799571	BRD4
chr17	75605549	79.616	0.00799571	MYO15B	exon		3'UTR
chr22	37379379	79.5614	0.00800119	ELFN2						CpG_Shelf_2-4kb_Downstream
chr18	62611198	-79.5256	0.00800479
chr9	129664262	-79.4949	0.00800789						CpG_Shore_2kb_Upstream
chr2	231190365	-79.3456	0.00802296
chr8	11226365	-79.1838	0.00803935
chr8	141183712	79.0964	0.00804823	DENND3
chr20	23257211	-79.0414	0.00805383
chr1	16167238	79.0039	0.00805765						CpG_Shore_2kb_Upstream
chr17	80632330	-78.8286	0.00807557	RPTOR
chr22	19523092	-78.7945	0.00807906	CLDN5	exon		3'UTR		CpG_Shore_2kb_Upstream		promoter_-_strand	ENSG00000287652
chr10	3066255	-78.7169	0.00808703						CpG_Shore_2kb_Upstream		promoter_-_strand	PFKP-DT
chr11	63765085	78.6462	0.0080943	ZFTA	exon			CpG: 21	CpG_Shore_2kb_Downstream	CpG_Shelf_2-4kb_Upstream
chr10	97805713	-78.4513	0.0081144
chr1	41495595	78.3779	0.008122						CpG_Shore_2kb_Upstream
chr17	35726882	-77.8655	0.00817544
chr11	126609054	-77.7923	0.00818314	KIRREL3-AS1
chr16	4355766	-77.747	0.0081879	CORO7-PAM16							promoter_-_strand	PAM16
chr22	50206779	-77.747	0.0081879	SELENOO					CpG_Shore_2kb_Downstream		promoter_-_strand	ENSG00000272836
chr8	143494526	77.7456	0.00818805	ZC3H3
chr19	29562556	-77.5151	0.0082124	VSTM2B
chr7	101486951	77.4919	0.00821485	COL26A1
chr3	50141207	77.4919	0.00821485	SEMA3F-AS1
chr20	51541517	-77.3236	0.00823273	NFATC2					CpG_Shore_2kb_Upstream
chr18	5097232	77.3052	0.00823469	LINC01892
chr16	89910432	77.2996	0.00823528	TCF25	exon				CpG_Shore_2kb_Upstream
chr11	96341692	77.0008	0.00826724	MAML2	exon
chr14	88551273	-76.9148	0.00827648	PTPN21	exon	5'UTR			CpG_Shore_2kb_Upstream	CpG_Shelf_2-4kb_Upstream	promoter_+_strand	ENSG00000258789
chr4	1009290	-76.9148	0.00827648						CpG_Shore_2kb_Upstream	CpG_Shelf_2-4kb_Upstream	promoter_+_strand	FGFRL1
chr20	62561920	-76.8793	0.00828031	MIR1-1HG
chr4	168648164	-76.819	0.00828681	PALLD-AS1
chr16	54817586	76.8007	0.00828878
chr2	219686590	76.7487	0.00829439	LINC02832	exon
chr4	154836916	-76.6761	0.00830224
chr19	55159535	76.495	0.0083219	ENSG00000267110	exon		3'UTR		CpG_Shore_2kb_Upstream	CpG_Shelf_2-4kb_Upstream
chr12	69116212	76.495	0.0083219
chr14	49584690	76.495	0.0083219	RPS29					CpG_Shore_2kb_Upstream
chr10	120209950	76.495	0.0083219
chr11	44876090	76.4225	0.00832979	TSPAN18
chr9	121546064	-76.3904	0.00833329
chr4	7226824	76.1922	0.00835496	SORCS2
chr1	5267570	-75.7466	0.00840411
chr6	90403909	-75.5116	0.00843026
chr17	7480016	-74.8956	0.00849959	ZBTB4					CpG_Shore_2kb_Downstream
chr10	123252490	-74.8837	0.00850094
chr18	79520297	74.8793	0.00850145	NFATC1				CpG: 23		CpG_Shelf_2-4kb_Upstream
chr3	194003084	-74.8358	0.00850638	LINC02026					CpG_Shore_2kb_Upstream
chr20	35617073	74.7376	0.00851756	SPAG4	exon	5'UTR		CpG: 19	CpG_Shore_2kb_Downstream	CpG_Shelf_2-4kb_Upstream
chr7	437894	-74.5893	0.00853449	ENSG00000286710	exon				CpG_Shore_2kb_Downstream	CpG_Shelf_2-4kb_Upstream
chr19	2819692	-74.3466	0.00856234					CpG: 81			promoter_+_strand	ZNF554
chr19	1158054	-74.3436	0.00856269	SBNO2				CpG: 125		CpG_Shelf_2-4kb_Downstream
chr11	65541117	-74.2057	0.00857861	LTBP3	exon				CpG_Shore_2kb_Downstream
chr15	40060631	-74.1564	0.00858431	SRP14-DT
chr11	430336	74.1108	0.00858958	ANO9	exon				CpG_Shore_2kb_Upstream
chr19	45876825	-73.9931	0.00860325
chr15	78389563	-73.735	0.00863336
chr11	66718526	-72.8436	0.008739	SPTBN2	exon
chr11	130638292	72.756	0.00874951
chr3	14413109	-72.5534	0.00877394	SLC6A6
chr7	138842289	72.2387	0.00881216	KIAA1549
chr21	45072721	71.9492	0.00884761	SSR4P1	exon				CpG_Shore_2kb_Upstream
chr2	27381432	-71.9241	0.0088507	PPM1G	exon		3'UTR		CpG_Shore_2kb_Downstream	CpG_Shelf_2-4kb_Downstream	promoter_-_strand	ZNF513
chr6	42010596	-71.4122	0.00891414
chr19	47419750	-71.3504	0.00892186						CpG_Shore_2kb_Downstream		promoter_-_strand	MEIS3
chr7	92590724	-71.2828	0.00893031						CpG_Shore_2kb_Downstream		promoter_-_strand	FAM133B
chr7	47582686	-71.2828	0.00893031						CpG_Shore_2kb_Downstream		promoter_-_strand	TNS3
chr11	68209839	71.2785	0.00893085	KMT5B						CpG_Shelf_2-4kb_Upstream
chr16	88462325	71.0956	0.00895383	ZFPM1
chr20	63498351	-70.9694	0.00896975	EEF1A2	exon				CpG_Shore_2kb_Upstream	CpG_Shelf_2-4kb_Downstream
chr16	46886162	-70.8974	0.00897886	GPT2					CpG_Shore_2kb_Downstream
chr17	81303181	70.6807	0.00900638
chr16	89618756	70.6807	0.00900638	DPEP1
chr1	36188117	-70.6079	0.00901566
chr5	179819717	70.4912	0.00903059						CpG_Shore_2kb_Upstream	CpG_Shelf_2-4kb_Downstream
chr8	17374207	70.4445	0.00903658	MTMR7
chr6	3260610	70.4344	0.00903787	PSMG4					CpG_Shore_2kb_Downstream
chr14	103091815	70.4344	0.00903787					CpG: 63
chr16	4415809	70.2088	0.00906691	CORO7-PAM16	exon				CpG_Shore_2kb_Upstream
chr11	65589458	-69.9872	0.00909561	EHBP1L1						CpG_Shelf_2-4kb_Upstream
chr1	151716350	-69.9197	0.00910439	CELF3	exon	5'UTR
chr14	102536068	69.673	0.00913663
chr3	123112444	69.673	0.00913663	PDIA5
chr9	129752817	-69.6603	0.00913829	PTGES
chr1	3154106	-69.5926	0.00914718	PRDM16					CpG_Shore_2kb_Upstream
chr9	34990823	-69.5926	0.00914718	DNAJB5	exon				CpG_Shore_2kb_Downstream
chr1	1169755	69.5477	0.00915309	ENSG00000272141	exon
chr7	1289503	-69.536	0.00915462						CpG_Shore_2kb_Upstream
chr5	139303617	69.4385	0.00916747	MATR3
chr3	127157980	-69.2068	0.00919816
chr2	36381399	69.0983	0.0092126	CRIM1
chr18	9434273	-69.0609	0.00921759
chr5	139671588	-69.007	0.00922479	CXXC5						CpG_Shelf_2-4kb_Downstream
chr17	79372527	68.9673	0.0092301	RBFOX3
chr22	44286613	68.9673	0.0092301	SHISAL1
chr10	44673691	-68.8443	0.00924658
chr10	71396131	-68.8443	0.00924658						CpG_Shore_2kb_Upstream		promoter_+_strand	CDH23
chr3	178336659	-68.451	0.00929971	ENSG00000223930
chr5	1156292	-68.451	0.00929971					CpG: 118
chr20	56832632	68.3144	0.00931831
chr17	74344709	-68.1306	0.00934344	KIF19
chr22	45495526	-67.621	0.00941384
chr8	142280947	-67.621	0.00941384	TSNARE1					CpG_Shore_2kb_Downstream
chr19	49938141	67.5561	0.00942288	ENSG00000269179
chr5	178561175	-67.2854	0.00946079	COL23A1
chr13	94765911	67.2118	0.00947114	SOX21-AS1
chr17	41773385	-66.7789	0.00953253	JUP
chr12	111403086	-66.7177	0.00954128	LINC02356						CpG_Shelf_2-4kb_Upstream
chr20	33694656	-66.5065	0.00957157
chr5	174698325	-66.0291	0.00964077
chr3	49022901	-65.9513	0.00965214	NDUFAF3	exon				CpG_Shore_2kb_Downstream
chr4	3879787	65.9035	0.00965914							CpG_Shelf_2-4kb_Downstream
chr8	10611598	-65.8254	0.00967059	RP1L1	exon				CpG_Shore_2kb_Upstream
chr7	150406023	-65.8254	0.00967059	ENSG00000284048					CpG_Shore_2kb_Upstream
chr12	30823414	65.5127	0.00971675	ENSG00000285517					CpG_Shore_2kb_Downstream
chr9	130193399	-65.4616	0.00972433	NCS1
chr2	38523929	-65.1063	0.00977739
chr16	2042716	-65.0381	0.00978764	NTHL1						CpG_Shelf_2-4kb_Downstream
chr9	37412816	64.9729	0.00979746
chr20	819075	-64.8249	0.00981983
chr17	30725176	-64.7758	0.00982727	ENSG00000279337	exon
chr7	151379960	64.6581	0.00984516						CpG_Shore_2kb_Upstream
chr9	129416288	-64.5601	0.00986009						CpG_Shore_2kb_Downstream
chr2	240136898	64.5563	0.00986068						CpG_Shore_2kb_Downstream		promoter_-_strand	COPS9
chr7	73900834	64.5563	0.00986068
chr16	88678275	64.5563	0.00986068	SNAI3	exon		3'UTR			CpG_Shelf_2-4kb_Upstream
chr1	16647851	-64.336	0.00989444	MST1P2	exon			CpG: 131		CpG_Shelf_2-4kb_Downstream
chr11	63985976	64.2423	0.00990887	ENSG00000256100	exon			CpG: 85			promoter_+_strand	OTUB1
chr7	157398070	64.144	0.00992406							CpG_Shelf_2-4kb_Upstream
chr2	73213096	-64.1381	0.00992496						CpG_Shore_2kb_Upstream
chr9	132185611	-64.1088	0.0099295	NTNG2
chr3	195628148	63.9479	0.00995447							CpG_Shelf_2-4kb_Upstream
chr1	27601905	63.8998	0.00996197	AHDC1					CpG_Shore_2kb_Upstream
chr3	38315077	-63.8565	0.00996873	SLC22A14
chr3	195061057	63.8157	0.0099751
chr12	6647372	-63.8027	0.00997712	ACRBP	exon	5'UTR		CpG: 55
chr9	1909305	-63.6435	0.0100021
chr15	98208110	-63.6435	0.0100021	ENSG00000259199
chr19	35783596	63.6216	0.0100055	ARHGAP33
chr7	151008914	63.6216	0.0100055	NOS3	exon			CpG: 26
chr9	134643891	63.6164	0.0100063	COL5A1					CpG_Shore_2kb_Downstream
chr18	2846391	-63.5986	0.0100091	ENSG00000289061	exon				CpG_Shore_2kb_Upstream		promoter_+_strand	EMILIN2
chr15	74421687	-63.4106	0.0100388	SEMA7A
chr13	26046972	63.4062	0.0100395	SHISA2	exon					CpG_Shelf_2-4kb_Upstream
chr1	227886782	63.3666	0.0100458						CpG_Shore_2kb_Upstream
chr7	36388953	63.3666	0.0100458						CpG_Shore_2kb_Upstream		promoter_+_strand	ANLN
chr10	72267962	-63.0252	0.0101002
chr7	71739674	62.9668	0.0101096
chr2	238280265	-62.85	0.0101283	PER2
chr2	96906607	62.8244	0.0101325	FAM178B
chr5	168268994	-62.7612	0.0101427	CTB-178M222
chr3	195891556	-62.6187	0.0101658	TNK2						CpG_Shelf_2-4kb_Upstream
chr19	13102832	-62.5453	0.0101777	LYL1	exon	5'UTR		CpG: 39	CpG_Shore_2kb_Upstream	CpG_Shelf_2-4kb_Downstream
chr19	4360526	-62.5381	0.0101788	SH3GL1	exon		3'UTR		CpG_Shore_2kb_Upstream
chr1	1040455	-62.5381	0.0101788	AGRN				CpG: 347
chr9	113881973	-62.5328	0.0101797	ZNF618
chr7	158586604	62.4837	0.0101877	PTPRN2					CpG_Shore_2kb_Upstream
chr17	82108257	-62.4373	0.0101953
chr17	44192115	-62.4174	0.0101985	ATXN7L3	exon		3'UTR
chr7	2500344	-61.8162	0.0102977
chr22	38412879	61.742	0.0103101					CpG: 28
chr1	6144819	-61.6124	0.0103318	CHD5						CpG_Shelf_2-4kb_Upstream
chr9	136328247	61.4364	0.0103613	GPSM1					CpG_Shore_2kb_Downstream		promoter_-_strand	DKFZP434A062
chr7	47253938	61.301	0.0103842	ENSG00000286315					CpG_Shore_2kb_Upstream
chr6	155112946	-61.2658	0.0103902	TIAM2
chr11	15697906	-61.2454	0.0103936	ENSG00000254695
chr22	20247004	61.1319	0.0104129	RTN4R
chr19	35022822	60.8208	0.0104662	ENSG00000271032					CpG_Shore_2kb_Downstream
chr21	45019163	60.8108	0.0104679					CpG: 127
chr1	206556803	60.7594	0.0104768	RASSF5					CpG_Shore_2kb_Upstream
chr9	127537460	60.7594	0.0104768	NIBAN2
chr17	2398849	-60.733	0.0104813	MNT					CpG_Shore_2kb_Upstream
chr5	103434376	60.7307	0.0104817	PDZPH1P
chr10	132563795	-60.6258	0.0104999	INPP5A
chr7	27123323	-60.6065	0.0105032	HOXA3	exon				CpG_Shore_2kb_Upstream
chr11	126135570	-60.6065	0.0105032
chr1	22025009	60.578	0.0105081	LINC00339	exon				CpG_Shore_2kb_Upstream
chr8	143946637	60.5155	0.010519	PLEC					CpG_Shore_2kb_Downstream	CpG_Shelf_2-4kb_Upstream
chr2	151704579	60.5155	0.010519	NEB
chr21	43383498	-60.4064	0.010538
chr1	43558522	-60.3841	0.0105419	PTPRF
chr10	71638933	60.3587	0.0105463	CDH23
chr11	14325403	60.1907	0.0105757	RRAS2
chr7	380010	-60.1005	0.0105916	ENSG00000249574					CpG_Shore_2kb_Downstream	CpG_Shelf_2-4kb_Downstream
chr17	57926377	60.077	0.0105957	CUEDC1
chr16	88759336	59.9812	0.0106127	PIEZO1
chr8	143435645	59.9713	0.0106144							CpG_Shelf_2-4kb_Upstream
chr17	76032580	59.9713	0.0106144
chr2	101342445	-59.8228	0.0106408
chr15	52806083	-59.8164	0.0106419					CpG: 82	CpG_Shore_2kb_Downstream		promoter_-_strand	ENSG00000259203
chr19	49861194	59.7383	0.0106558						CpG_Shore_2kb_Upstream	CpG_Shelf_2-4kb_Downstream
chr19	30567024	59.5945	0.0106815
chr10	124550734	-59.528	0.0106934	LHPP
chr10	778656	-59.528	0.0106934
chr20	62768606	-59.4766	0.0107027							CpG_Shelf_2-4kb_Upstream
chr6	169287200	59.4751	0.010703	ENSG00000233085	exon
chr17	3678336	-59.3591	0.0107239	P2RX5
chr3	195748139	59.0752	0.0107754	MUC4						CpG_Shelf_2-4kb_Upstream
chr11	64284156	58.9882	0.0107913	BAD					CpG_Shore_2kb_Upstream	CpG_Shelf_2-4kb_Upstream
chr7	149790092	-58.9636	0.0107958	SSPOP					CpG_Shore_2kb_Upstream
chr21	41725676	-58.9622	0.010796
chr11	2780536	-58.9197	0.0108038	KCNQ1
chr9	113610083	-58.8993	0.0108076
chr11	128823935	58.8814	0.0108109						CpG_Shore_2kb_Upstream
chr3	37545104	58.8814	0.0108109	ITGA9
chr17	80837841	58.8814	0.0108109	RPTOR						CpG_Shelf_2-4kb_Upstream
chr16	85602195	58.367	0.0109061
chr9	137959908	58.2283	0.0109321	CACNA1B
chr16	86033300	-58.0879	0.0109585
chr14	99322801	58.0392	0.0109677							CpG_Shelf_2-4kb_Downstream
chr1	910432	58.0392	0.0109677	ENSG00000272438				CpG: 154
chr5	56350716	-57.8518	0.0110032
chr10	70918994	57.7578	0.0110211						CpG_Shore_2kb_Downstream
chr15	25779430	57.7206	0.0110282	ATP10A
chr3	193902495	57.6553	0.0110407
chr5	146059896	57.6469	0.0110423	SH3RF2	exon
chr4	122798422	-57.6135	0.0110487
chr22	29258813	57.5303	0.0110647	EMID1
chr2	118169476	-57.5123	0.0110682
chr10	125162709	57.4606	0.0110781	ENSG00000282787	exon			CpG: 350
chr17	29576081	57.4412	0.0110819	GIT1	exon					CpG_Shelf_2-4kb_Downstream
chr1	47677431	57.4412	0.0110819
chr16	85291680	-57.3483	0.0110998	ENSG00000287787
chr19	1156358	-57.3241	0.0111045	SBNO2					CpG_Shore_2kb_Upstream
chr9	127972105	-57.1996	0.0111287	FAM102A
chr20	61734101	-57.1734	0.0111338	CDH4
chr16	642804	57.0896	0.0111501	MCRIP2	exon				CpG_Shore_2kb_Downstream	CpG_Shelf_2-4kb_Upstream
chr16	2423367	-57.0521	0.0111574	ABCA17P
chr14	104708393	56.6835	0.01123	INF2	exon
chr5	139659776	56.5215	0.0112621	CXXC5					CpG_Shore_2kb_Upstream
chr11	8033389	-56.4416	0.0112781						CpG_Shore_2kb_Downstream
chr1	153806334	-56.4368	0.011279	GATAD2B	exon		3'UTR
chr8	143383718	-56.4368	0.011279	RHPN1	exon		3'UTR			CpG_Shelf_2-4kb_Downstream
chr10	77711207	56.4218	0.011282					CpG: 38
chr1	3389193	56.3447	0.0112975	PRDM16					CpG_Shore_2kb_Upstream
chr10	133030966	-56.2729	0.0113119					CpG: 41	CpG_Shore_2kb_Downstream
chr1	37990487	56.2184	0.0113229						CpG_Shore_2kb_Downstream		promoter_-_strand	SF3A3
chr4	1010503	-56.1779	0.011331	FGFRL1				CpG: 340		CpG_Shelf_2-4kb_Upstream
chr16	58034856	-56.1779	0.011331	MMP15
chr3	129403579	-56.1511	0.0113364	EFCAB12	exon
chr7	2474523	-56.0615	0.0113545
chr9	136060790	-56.0504	0.0113568	NACC2
chr18	78193702	-55.9657	0.011374
chr8	41684511	55.9321	0.0113808	ANK1
chr12	58933617	-55.8971	0.0113879	LRIG3-DT
chr11	5066572	55.7781	0.0114122
chr7	91135501	55.7781	0.0114122	CDK14
chr9	110127364	55.7233	0.0114234
chr10	124640891	-55.6825	0.0114318	FAM53B
chr4	1055820	55.5773	0.0114534						CpG_Shore_2kb_Upstream
chr8	66542182	-55.5573	0.0114576						CpG_Shore_2kb_Upstream
chr3	101635782	-55.2972	0.0115114
chr10	69382625	55.297	0.0115115	HK1	exon		3'UTR
chr1	9654701	-55.2789	0.0115152	PIK3CD					CpG_Shore_2kb_Downstream		promoter_-_strand	PIK3CD-AS1
chr7	45580394	-55.2789	0.0115152	ADCY1
chr10	123995605	55.2359	0.0115242							CpG_Shelf_2-4kb_Downstream
chr15	99123525	-54.99	0.0115757	SYNM
chr19	17340374	54.9493	0.0115843	GTPBP3						CpG_Shelf_2-4kb_Downstream
chr17	17055995	54.8983	0.0115951	MPRIP
chr20	62357235	-54.8157	0.0116125	LAMA5
chr1	112312552	-54.8157	0.0116125	LINC02884
chr11	126442980	-54.6155	0.0116551	KIRREL3
chr7	157903809	54.3089	0.0117209	PTPRN2					CpG_Shore_2kb_Downstream
chr11	73362157	-54.2152	0.0117411	ARHGEF17	exon			CpG: 66
chr7	101487137	-54.2152	0.0117411	COL26A1
chr9	135992756	-54.1897	0.0117467							CpG_Shelf_2-4kb_Downstream
chr10	69607155	54.1292	0.0117598
chr20	61982953	-54.1017	0.0117657	TAF4						CpG_Shelf_2-4kb_Downstream
chr7	29512102	-54.0064	0.0117865	CHN2
chr2	112435567	-53.8581	0.011819						CpG_Shore_2kb_Downstream
chr9	136668129	-53.8581	0.011819	EGFL7					CpG_Shore_2kb_Downstream	CpG_Shelf_2-4kb_Upstream
chr8	132418063	-53.8581	0.011819	KCNQ3
chr17	75087356	53.8385	0.0118233						CpG_Shore_2kb_Upstream		promoter_+_strand	SLC16A5
chr20	43721442	-53.6769	0.0118588
chr11	117670947	53.612	0.0118732	DSCAML1
chr16	25608367	-53.5074	0.0118964
chr20	4187292	53.4987	0.0118983	SMOX	exon
chr1	25575072	-53.4848	0.0119014
chr14	98831519	-53.4848	0.0119014
chr8	130948853	-53.2787	0.0119475	ADCY8
chr8	143737845	-53.2666	0.0119502	FAM83H	exon				CpG_Shore_2kb_Upstream	CpG_Shelf_2-4kb_Downstream
chr15	77622443	53.0923	0.0119894	LINGO1
chr7	155945086	-53.0729	0.0119938
chr11	35139675	-53.0356	0.0120022	CD44					CpG_Shore_2kb_Downstream
chr9	134275869	52.996	0.0120112
chr16	85174494	-52.9722	0.0120166							CpG_Shelf_2-4kb_Downstream
chr3	129003658	52.8751	0.0120386	EFCC1				CpG: 72	CpG_Shore_2kb_Downstream
chr12	131448475	-52.8347	0.0120478	ENSG00000275232
chr7	128454704	52.725	0.0120729						CpG_Shore_2kb_Upstream
chr17	3963797	-52.7212	0.0120738	ATP2A3				CpG: 107
chr12	54034818	52.6613	0.0120875	HOXC5	exon		3'UTR	CpG: 126		CpG_Shelf_2-4kb_Downstream
chr8	142447872	-52.4964	0.0121255						CpG_Shore_2kb_Upstream
chr7	376454	-52.4964	0.0121255					CpG: 16	CpG_Shore_2kb_Downstream	CpG_Shelf_2-4kb_Upstream
chr20	3203647	52.4004	0.0121477	DDRGK1					CpG_Shore_2kb_Upstream
chr7	31061092	52.341	0.0121615	ADCYAP1R1
chr11	69288199	52.3155	0.0121674
chr10	124075954	-52.3066	0.0121694	CHST15
chr10	71319920	52.2713	0.0121777	SLC29A3
chr22	20281984	-52.1676	0.0122019
chr22	23158642	52.1566	0.0122044	RAB36
chr17	41609992	-52.1383	0.0122087	KRT16	exon
chr17	9121674	52.1268	0.0122114	NTN1
chr22	19903743	52.078	0.0122229	TXNRD2						CpG_Shelf_2-4kb_Upstream
chr20	61367212	52.0605	0.012227	CDH4
chr6	170286880	-51.9528	0.0122523	DLL1					CpG_Shore_2kb_Upstream	CpG_Shelf_2-4kb_Upstream
chr11	102047359	-51.78	0.0122932					CpG: 39			promoter_+_strand	CFAP300
chr1	36483062	-51.7758	0.0122942		exon	5'UTR					promoter_-_strand	CSF3R
chr4	128819599	51.6275	0.0123295	JADE1
chr20	36493655	-51.5191	0.0123554	DLGAP4
chr21	41725760	-51.4838	0.0123639
chr1	7681103	-51.4337	0.0123759	CAMTA1					CpG_Shore_2kb_Downstream
chr7	101747880	-51.3852	0.0123876
chr5	119321088	51.3646	0.0123926	TNFAIP8
chr17	1031323	51.3501	0.0123961	ABR				CpG: 56	CpG_Shore_2kb_Downstream
chr1	37400611	-51.2872	0.0124113	LINC01137
chr22	30288961	-51.2101	0.0124299	CASTOR1					CpG_Shore_2kb_Upstream
chr11	308169	-51.1849	0.0124361	IFITM2	exon	5'UTR				CpG_Shelf_2-4kb_Upstream	promoter_+_strand	ENSG00000288681
chr15	101494388	51.0095	0.0124788							CpG_Shelf_2-4kb_Downstream
chr1	54980403	-50.8594	0.0125156	ENSG00000284601	exon				CpG_Shore_2kb_Upstream		promoter_+_strand	TMEM61
chr12	62097945	-50.8594	0.0125156	TAFA2
chr19	33163731	-50.6602	0.0125648	WDR88
chr15	98883680	-50.5082	0.0126027	ENSG00000259621
chr22	40009585	-50.5082	0.0126027	FAM83F
chr8	24415294	50.2675	0.012663
chr2	97691396	-50.2078	0.012678	C2orf92
chr16	631298	-49.98	0.0127358	WFIKKN1	exon				CpG_Shore_2kb_Upstream	CpG_Shelf_2-4kb_Downstream
chr10	11562333	49.7967	0.0127827
chr22	38097167	-49.3452	0.0128996	BAIAP2L2	exon		3'UTR
chr17	63931850	-49.3452	0.0128996	CD79B							promoter_-_strand	ENSG00000285947
chr19	39335535	-49.3167	0.012907	GMFG	exon	5'UTR
chr16	13957505	-49.0959	0.0129651
chr19	5322604	-49.0196	0.0129853
chr11	46294824	-48.9563	0.013002	CREB3L1					CpG_Shore_2kb_Upstream
chr3	13526104	48.8773	0.0130231
chr1	94735581	-48.8192	0.0130385	SLC44A3-AS1
chr13	110138873	-48.7442	0.0130586						CpG_Shore_2kb_Downstream
chr4	6673581	-48.7332	0.0130615	LINC02482	exon	5'UTR			CpG_Shore_2kb_Upstream		promoter_+_strand	ENSG00000170846
chr4	80307952	48.6889	0.0130734
chr12	131381288	48.6632	0.0130803
chr18	3457608	-48.6625	0.0130805	TGIF1	exon
chr19	30720115	-48.6625	0.0130805						CpG_Shore_2kb_Downstream
chr19	17076778	48.5578	0.0131087	MYO9B					CpG_Shore_2kb_Downstream
chr12	124838230	48.5578	0.0131087	SCARB1					CpG_Shore_2kb_Upstream
chr10	33428976	48.5559	0.0131092
chr1	143975419	-48.3512	0.0131647	SRGAP2D					CpG_Shore_2kb_Downstream
chr1	1541173	48.3444	0.0131666					CpG: 154		CpG_Shelf_2-4kb_Downstream	promoter_-_strand	TMEM240
chr2	9801339	-48.2189	0.0132008
chr5	116361573	-48.1031	0.0132326					CpG: 45
chr2	241386343	-48.0759	0.0132401	FARP2
chr9	128412306	-48.0098	0.0132583
chr2	128322876	47.9989	0.0132613						CpG_Shore_2kb_Downstream	CpG_Shelf_2-4kb_Downstream
chr5	74549632	47.9386	0.013278
chr10	70483660	-47.7864	0.0133203	PALD1
chr1	212458042	47.7521	0.0133298
chr1	1174785	47.746	0.0133315	TTLL10-AS1	exon				CpG_Shore_2kb_Downstream
chr14	104977746	47.5904	0.0133751	AHNAK2				CpG: 116
chr1	17819342	-47.5615	0.0133832	ACTL8
chr19	573879	-47.543	0.0133884	BSG					CpG_Shore_2kb_Downstream	CpG_Shelf_2-4kb_Upstream
chr8	31077381	47.4891	0.0134036	WRN
chr5	172103221	47.449	0.0134149	STK10
chr11	62544206	47.3932	0.0134307	AHNAK					CpG_Shore_2kb_Upstream	CpG_Shelf_2-4kb_Upstream
chr19	47379637	47.3932	0.0134307	DHX34
chr6	168083400	-47.2208	0.0134797	FRMD1
chr5	141514154	-47.1684	0.0134947						CpG_Shore_2kb_Downstream
chr17	50117742	-47.158	0.0134977	SAMD14	exon				CpG_Shore_2kb_Downstream
chr15	40276259	-47.158	0.0134977	PAK6	exon		3'UTR			CpG_Shelf_2-4kb_Upstream
chr10	2935840	-47.1369	0.0135037								promoter_+_strand	ENSG00000231743
chr1	20491521	-47.1369	0.0135037
chr20	33731705	-47.1369	0.0135037	ENSG00000229188	exon	5'UTR		CpG: 120
chr19	50466389	47.0854	0.0135185
chr7	1842498	-47.0775	0.0135208	MAD1L1					CpG_Shore_2kb_Downstream	CpG_Shelf_2-4kb_Upstream
chr17	39654757	-47.0526	0.0135279	STARD3
chr12	130880185	-47.0526	0.0135279
chr20	37912710	-47.0526	0.0135279	VSTM2L
chr7	125181675	-47.0526	0.0135279	POT1-AS1
chr8	38432507	-47.0526	0.0135279	FGFR1
chr12	125253020	-47.0499	0.0135287
chr19	15201429	47.0187	0.0135377						CpG_Shore_2kb_Downstream		promoter_-_strand	NOTCH3
chr7	4725422	-46.705	0.0136286	FOXK1				CpG: 42			promoter_+_strand	ENSG00000287665
chr17	43932674	46.6265	0.0136515
chr5	6491688	-46.5709	0.0136678	UBE2QL1	exon		3'UTR
chr10	133257600	-46.5489	0.0136743							CpG_Shelf_2-4kb_Upstream	promoter_-_strand	ENSG00000273980
chr19	850872	-46.5394	0.013677						CpG_Shore_2kb_Upstream	CpG_Shelf_2-4kb_Downstream	promoter_+_strand	ELANE
chr19	1045541	46.5239	0.0136816	ABCA7	exon				CpG_Shore_2kb_Upstream
chr1	88463144	-46.4396	0.0137064	ENSG00000286758	exon				CpG_Shore_2kb_Downstream
chr3	53167264	-46.4211	0.0137119	PRKCD
chr2	15912361	46.3513	0.0137325
chr11	834465	-46.3394	0.0137361	CD151	exon				CpG_Shore_2kb_Downstream
chr11	64284268	-46.3075	0.0137455	BAD	exon				CpG_Shore_2kb_Upstream	CpG_Shelf_2-4kb_Upstream
chr1	181476781	-46.2292	0.0137688
chr5	135494275	-46.1675	0.0137872							CpG_Shelf_2-4kb_Downstream
chr6	34027452	-46.1379	0.013796	GRM4					CpG_Shore_2kb_Upstream
chr8	142015244	-46.1293	0.0137986
chr10	101228396	-45.9643	0.0138481	LBX1				CpG: 513
chr11	111918911	-45.9349	0.013857	CRYAB	exon	5'UTR	3'UTR				promoter_+_strand	C11orf52
chr1	26360983	45.9333	0.0138575						CpG_Shore_2kb_Downstream		promoter_-_strand	CRYBG2
chr22	38844489	45.849	0.013883						CpG_Shore_2kb_Downstream		promoter_-_strand	NPTXR
chr9	137251168	-45.8385	0.0138861	STPG3-AS1	exon					CpG_Shelf_2-4kb_Upstream	promoter_+_strand	STPG3
chr1	2474136	-45.787	0.0139017
chr20	32987613	-45.7244	0.0139207	SUN5
chr14	103098301	45.6608	0.0139401	EXOC3L4						CpG_Shelf_2-4kb_Upstream
chr14	101628119	45.6565	0.0139415						CpG_Shore_2kb_Upstream
chr1	10634156	45.6565	0.0139415
chr6	106046584	-45.6002	0.0139587		exon		3'UTR
chr2	10560284	45.5949	0.0139603
chr8	48865523	45.5949	0.0139603
chr21	26732873	45.5753	0.0139663
chr21	33121995	45.5489	0.0139744	ENSG00000226527	exon
chr16	85650859	45.5334	0.0139791	GSE1				CpG: 33
chr1	1433876	-45.5082	0.0139869	LINC01770					CpG_Shore_2kb_Upstream	CpG_Shelf_2-4kb_Downstream
chr19	46612032	-45.5082	0.0139869
chr3	172125414	-45.4834	0.0139945	FNDC3B
chr17	72778322	-45.4656	0.014	SLC39A11
chr14	97299916	-45.4632	0.0140007
chr11	119978443	45.4588	0.0140021	ENSG00000286992
chr5	179857733	45.4067	0.0140181	MRNIP					CpG_Shore_2kb_Upstream
chr1	115338886	45.3801	0.0140263	NGF-AS1					CpG_Shore_2kb_Downstream		promoter_-_strand	NGF
chr11	1260370	-45.3793	0.0140266	MUC5B	exon
chr3	10764312	-45.2141	0.0140778								promoter_-_strand	LINC00606
chr21	43768495	-45.1261	0.0141053	ENSG00000287507
chr22	39013228	-45.1185	0.0141076
chr11	119696795	-45.0541	0.0141278	NECTIN1
chr19	417156	-45.0367	0.0141333	SHC2	exon		3'UTR		CpG_Shore_2kb_Upstream
chr7	128890848	-45.0367	0.0141333	KCP				CpG: 61
chr7	158317080	44.9497	0.0141606	PTPRN2					CpG_Shore_2kb_Upstream
chr20	59567714	44.9497	0.0141606
chr14	68691711	-44.8935	0.0141783
chr3	185829503	-44.8858	0.0141807							CpG_Shelf_2-4kb_Downstream
chr16	72849220	-44.8401	0.0141952	ZFHX3
chr20	64168040	44.8222	0.0142009	MYT1
chr4	150249014	44.8016	0.0142074	DCLK2
chr3	13479644	-44.7474	0.0142246	HDAC11-AS1	exon			CpG: 66			promoter_+_strand	HDAC11
chr1	230142432	44.724	0.014232	GALNT2
chr5	1594932	44.724	0.014232	ENSG00000271119	exon				CpG_Shore_2kb_Downstream		promoter_-_strand	SDHAP3
chr1	205800533	-44.5625	0.0142836	SLC41A1
chr12	132366561	-44.5615	0.0142839							CpG_Shelf_2-4kb_Downstream
chr21	44249834	44.4665	0.0143144	DNMT3L							promoter_+_strand	DNMT3L-AS1
chr13	31208578	-44.4543	0.0143184	B3GLCT
chr1	205481887	44.4443	0.0143216
chr14	70821495	44.4399	0.014323						CpG_Shore_2kb_Upstream		promoter_+_strand	ENSG00000275630
chr8	10679811	-44.4334	0.0143251	C8orf74
chr9	131608004	44.417	0.0143304	RAPGEF1
chr11	8059907	-44.4036	0.0143347								promoter_+_strand	TUB-AS1
chr1	11563901	-44.4027	0.014335
chr9	137271784	-44.3441	0.0143539	NELFB					CpG_Shore_2kb_Upstream
chr15	85137675	-44.1251	0.0144252	PDE8A
chr14	100723561	44.0382	0.0144536							CpG_Shelf_2-4kb_Upstream
chr17	2056609	-44.0199	0.0144596	HIC1	exon	5'UTR		CpG: 810
chr6	21852144	44.0065	0.014464
chr5	65928226	43.8062	0.0145301	ERBIN					CpG_Shore_2kb_Downstream
chr3	143640181	43.7908	0.0145352	SLC9A9
chr5	3120247	43.5794	0.0146057
chr1	11762019	43.5236	0.0146244		exon	5'UTR			CpG_Shore_2kb_Upstream		promoter_+_strand	C1orf167
chr1	30763855	-43.5039	0.0146311
chr16	81612560	-43.5039	0.0146311	CMIP
chr13	113089749	43.502	0.0146317	MCF2L					CpG_Shore_2kb_Downstream
chr19	13765651	-43.4917	0.0146351	MRI1					CpG_Shore_2kb_Downstream	CpG_Shelf_2-4kb_Downstream
chr4	3864295	-43.3748	0.0146746
chr4	7663460	-43.3748	0.0146746	SORCS2					CpG_Shore_2kb_Upstream
chr1	10676279	43.2627	0.0147126	CASZ1
chr7	47489169	-43.2466	0.0147181	TNS3
chr10	100709571	-43.1853	0.0147389						CpG_Shore_2kb_Upstream	CpG_Shelf_2-4kb_Upstream
chr11	69862551	-43.1055	0.0147662
chr11	10693731	42.9942	0.0148045	IRAG1	exon	5'UTR
chr10	72249231	42.9942	0.0148045
chr20	62378469	42.9942	0.0148045					CpG: 19
chr19	10402646	-42.9806	0.0148091	CDC37					CpG_Shore_2kb_Upstream
chr17	44326162	-42.9179	0.0148308	ENSG00000288961					CpG_Shore_2kb_Downstream
chr14	93927310	-42.882	0.0148432	FAM181A							promoter_-_strand	FAM181A-AS1
chr1	15761097	-42.8638	0.0148494	FBLIM1					CpG_Shore_2kb_Downstream
chr12	104747220	42.8311	0.0148608	CHST11
chr4	3958306	42.8311	0.0148608						CpG_Shore_2kb_Downstream
chr22	42309012	42.7177	0.0149002
chr8	122911459	42.7177	0.0149002	ZHX2
chr16	9183770	42.7043	0.0149049
chr3	49276575	42.5382	0.0149631	C3orf62	exon				CpG_Shore_2kb_Upstream
chr3	134327404	42.5382	0.0149631
chr15	90145792	42.5354	0.0149641
chr12	100716769	42.5123	0.0149722					CpG: 161
chr20	32466917	42.4993	0.0149768	NOL4L
chr1	4880845	-42.4618	0.01499
chr1	156895659	-42.3591	0.0150263	PEAR1					CpG_Shore_2kb_Downstream
chr16	85313722	-42.303	0.0150462
chr8	42197732	42.2793	0.0150547	PLAT
chr10	133252141	-42.239	0.015069
chr1	9128382	42.1535	0.0150996	GPR157					CpG_Shore_2kb_Upstream
chr10	129024062	42.1535	0.0150996
chr2	12778670	-42.1346	0.0151064
chr11	69862757	-42.1085	0.0151157
chr2	231192638	-42.1023	0.0151179
chr22	49184188	42.091	0.015122	ENSG00000285623					CpG_Shore_2kb_Downstream
chr17	49880299	-42.0508	0.0151364						CpG_Shore_2kb_Upstream
chr4	55080005	42.0503	0.0151366	KDR	exon
chr12	128374194	41.9037	0.0151896	TMEM132C
chr12	45991304	41.8907	0.0151943	ENSG00000289046	exon				CpG_Shore_2kb_Downstream		promoter_-_strand	SCAF11
chr11	62736655	41.8599	0.0152055	TTC9C
chr19	13938391	41.7915	0.0152303	PODNL1	exon	5'UTR
chr15	28004218	41.6972	0.0152648	OCA2					CpG_Shore_2kb_Downstream
chr1	245606422	-41.6832	0.0152699	KIF26B
chr22	38756445	-41.6428	0.0152847	SUN2				CpG: 132
chr17	80721036	-41.6321	0.0152886	RPTOR
chr2	106130699	-41.6321	0.0152886	UXS1
chr17	81959493	-41.6321	0.0152886	NOTUM	exon			CpG: 350		CpG_Shelf_2-4kb_Upstream
chr16	89565214	-41.6321	0.0152886						CpG_Shore_2kb_Upstream	CpG_Shelf_2-4kb_Downstream
chr22	39307166	-41.6321	0.0152886
chr19	3095362	-41.6321	0.0152886	GNA11					CpG_Shore_2kb_Downstream	CpG_Shelf_2-4kb_Upstream
chr3	44013837	-41.6321	0.0152886
chr10	79066932	41.5531	0.0153177	ZMIZ1-AS1					CpG_Shore_2kb_Upstream
chr11	1997534	41.5531	0.0153177	H19	exon				CpG_Shore_2kb_Upstream		promoter_-_strand	MIR675
chr16	81499871	41.5531	0.0153177	CMIP
chr19	49832188	-41.55	0.0153188	MED25
chr5	75901758	-41.5065	0.0153349
chr11	10176076	-41.4631	0.0153509	SBF2
chr1	54542971	-41.2741	0.0154212						CpG_Shore_2kb_Downstream
chr19	12059903	-41.2694	0.0154229	ENSG00000286098
chr6	42048128	-41.1106	0.0154825		exon				CpG_Shore_2kb_Upstream	CpG_Shelf_2-4kb_Upstream
chr5	6773489	41.0997	0.0154866	LINC02236					CpG_Shore_2kb_Upstream
chr22	34599425	-41.0621	0.0155008
chr5	171324704	40.9966	0.0155255
chr16	54817622	40.9097	0.0155585
chr12	52015156	-40.8794	0.01557	TAMALIN	exon			CpG: 66
chr5	43604197	40.8531	0.01558	NNT					CpG_Shore_2kb_Downstream
chr1	47686819	-40.7728	0.0156107
chr5	122515604	40.7521	0.0156187
chr22	27621859	40.7249	0.0156291
chr9	134968226	-40.7248	0.0156291
chr10	101310725	40.7243	0.0156293					CpG: 18			promoter_+_strand	ENSG00000225208
chr1	929037	-40.7036	0.0156372	SAMD11						CpG_Shelf_2-4kb_Downstream
chr11	64351911	-40.6991	0.015639	CCDC88B
chr1	27406568	-40.6126	0.0156723	WASF2	exon		3'UTR
chr11	826914	40.352	0.0157734	ENSG00000255108					CpG_Shore_2kb_Upstream	CpG_Shelf_2-4kb_Upstream
chr20	63247174	-40.2668	0.0158068	NKAIN4					CpG_Shore_2kb_Downstream
chr2	172270686	40.2182	0.0158259	ENSG00000232555
chr2	44709158	40.1798	0.015841	CAMKMT
chr22	39230283	-40.1543	0.0158511	PDGFB					CpG_Shore_2kb_Upstream
chr1	155941765	-40.0886	0.015877	RXFP4	exon
chr11	70742593	-40.0728	0.0158833	SHANK2
chr11	10308225	-40.0122	0.0159073					CpG: 200		CpG_Shelf_2-4kb_Downstream
chr1	11787513	-39.9942	0.0159145	C1orf167	exon		3'UTR
chr14	104600396	-39.9812	0.0159197	TMEM179						CpG_Shelf_2-4kb_Upstream
chr19	2271648	-39.931	0.0159397	OAZ1	exon				CpG_Shore_2kb_Upstream	CpG_Shelf_2-4kb_Upstream
chr19	14298081	-39.9094	0.0159483
chr21	38988640	-39.8972	0.0159532		exon
chr15	78681855	-39.8592	0.0159684	ENSG00000261303
chr7	1713147	39.8534	0.0159707	ELFN1					CpG_Shore_2kb_Upstream
chr3	145116832	39.7865	0.0159975
chr3	186099219	39.7865	0.0159975	ETV5
chr2	128261900	39.7804	0.016
chr5	522206	39.7361	0.0160178	SLC9A3					CpG_Shore_2kb_Upstream
chr11	64164812	-39.7356	0.016018	MACROD1					CpG_Shore_2kb_Upstream
chr5	19080938	-39.7078	0.0160292	ENSG00000249174
chr13	113161676	-39.6187	0.0160653	PROZ
chr5	125924079	-39.6136	0.0160673	ENSG00000248752
chr12	123078060	-39.4594	0.0161301	PITPNM2
chr9	38688101	39.438	0.0161388
chr4	7772955	-39.4026	0.0161533	AFAP1-AS1	exon
chr17	81721098	-39.3976	0.0161554
chr22	43104413	39.3825	0.0161616
chr4	3864934	39.3461	0.0161765
chr1	1438100	-39.3132	0.0161901	VWA1					CpG_Shore_2kb_Upstream	CpG_Shelf_2-4kb_Downstream
chr11	68312340	-39.2922	0.0161987					CpG: 176			promoter_+_strand	LRP5
chr15	30775643	-39.2916	0.0161989
chr11	69862663	-39.2579	0.0162128
chr16	89162620	39.1783	0.0162458	LINC00304	exon					CpG_Shelf_2-4kb_Upstream
chr22	20964725	39.0411	0.0163028						CpG_Shore_2kb_Upstream		promoter_+_strand	AIFM3
chr4	139254935	39.0171	0.0163128
chr7	100853519	38.9498	0.016341	SLC12A9					CpG_Shore_2kb_Downstream		promoter_-_strand	SLC12A9-AS1
chr9	63384191	38.8774	0.0163715	BMS1P10
chr12	141305	-38.8443	0.0163854	ENSG00000249695					CpG_Shore_2kb_Downstream
chr2	27715506	-38.835	0.0163893	LINC01460				CpG: 31
chr19	1360272	-38.8203	0.0163955	PWWP3A	exon		3'UTR	CpG: 23
chr1	3707207	38.8167	0.016397	TP73					CpG_Shore_2kb_Downstream
chr9	124423739	-38.7779	0.0164135
chr22	49839059	-38.7591	0.0164214								promoter_-_strand	ENSG00000260613
chr19	10364637	38.7372	0.0164307	TYK2	exon
chr14	68608463	38.6487	0.0164683	ENSG00000287385
chr9	135783791	-38.5898	0.0164934	KCNT1					CpG_Shore_2kb_Downstream	CpG_Shelf_2-4kb_Upstream
chr15	64681706	-38.5856	0.0164952	ZNF609	exon		3'UTR
chr19	19224826	38.5316	0.0165183	NCAN					CpG_Shore_2kb_Upstream
chr17	55420807	-38.4274	0.0165631	MMD					CpG_Shore_2kb_Upstream
chr2	74553639	-38.4274	0.0165631	LOXL3					CpG_Shore_2kb_Upstream	CpG_Shelf_2-4kb_Downstream
chr3	128522868	-38.4274	0.0165631
chr16	68355657	38.4128	0.0165694	PRMT7	exon
chr11	67543322	38.3908	0.0165789
chr22	50260704	38.3908	0.0165789	MAPK12					CpG_Shore_2kb_Upstream
chr9	121814051	-38.3815	0.0165829
chr22	29726340	-38.3345	0.0166032	CABP7						CpG_Shelf_2-4kb_Upstream
chr7	73768557	38.3005	0.0166179						CpG_Shore_2kb_Upstream
chr22	39255046	38.2591	0.0166359	ENSG00000284633
chr11	19670393	-38.2167	0.0166544
chr9	129666868	-38.1801	0.0166703	PRRX2					CpG_Shore_2kb_Downstream
chr14	58171351	-38.1356	0.0166898
chr5	3300927	-38.0998	0.0167055
chr4	3473257	-38.097	0.0167067	DOK7					CpG_Shore_2kb_Upstream	CpG_Shelf_2-4kb_Upstream
chr1	160116346	-38.0931	0.0167084	ATP1A2
chr4	2393705	-37.9512	0.0167708	ZFYVE28
chr2	96913306	-37.9342	0.0167783	ENSG00000286654
chr20	50047208	-37.9132	0.0167876
chr8	1480248	37.7848	0.0168446							CpG_Shelf_2-4kb_Upstream
chr16	85551221	-37.7538	0.0168585							CpG_Shelf_2-4kb_Upstream
chr11	47578452	-37.7167	0.016875	KBTBD4	exon	5'UTR			CpG_Shore_2kb_Upstream		promoter_+_strand	NDUFS3
chr6	37715528	-37.7113	0.0168775
chr11	118792583	37.6567	0.0169019	ENSG00000278376	exon				CpG_Shore_2kb_Downstream
chr11	3169388	37.6567	0.0169019							CpG_Shelf_2-4kb_Downstream
chr19	55377675	37.6567	0.0169019	TMEM190	exon			CpG: 38
chr9	124343444	37.6567	0.0169019	NEK6
chr4	1173438	37.5922	0.0169309	SPON2					CpG_Shore_2kb_Downstream
chr16	1050121	-37.5766	0.0169379						CpG_Shore_2kb_Upstream
chr10	86685513	-37.4778	0.0169826	LDB3
chr11	64041496	37.4168	0.0170102	FLRT1
chr16	71913934	37.4168	0.0170102	IST1
chr9	133163117	37.4168	0.0170102	GBGT1	exon			CpG: 105
chr9	136606237	37.3972	0.0170192
chr10	131982679	37.3972	0.0170192					CpG: 213	CpG_Shore_2kb_Downstream	CpG_Shelf_2-4kb_Downstream	promoter_-_strand	BNIP3
chr22	41925519	37.3972	0.0170192	TNFRSF13C	exon				CpG_Shore_2kb_Upstream
chr10	133235406	37.3972	0.0170192					CpG: 271		CpG_Shelf_2-4kb_Downstream
chr13	114153053	-37.3831	0.0170256							CpG_Shelf_2-4kb_Downstream
chr19	8639962	-37.3781	0.0170278	NFILZ
chr1	10734962	-37.3288	0.0170503	CASZ1
chr11	73264540	-37.3284	0.0170505	P2RY6	exon	5'UTR		CpG: 32
chr9	136599135	37.2957	0.0170654
chr10	112960603	37.2706	0.0170769	TCF7L2
chr19	3115558	-37.2441	0.0170891	GNA11					CpG_Shore_2kb_Downstream
chr15	92656399	37.2303	0.0170954						CpG_Shore_2kb_Downstream		promoter_-_strand	FAM174B
chr1	197923281	37.0762	0.0171664	LHX9					CpG_Shore_2kb_Downstream
chr11	1271253	-37.0752	0.0171669						CpG_Shore_2kb_Upstream
chr10	101011812	-37.0689	0.0171698	PDZD7
chr5	34190432	37.0513	0.0171779	ENSG00000215156	exon
chr16	88754617	-36.9956	0.0172038	PIEZO1					CpG_Shore_2kb_Upstream
chr8	23336281	-36.9211	0.0172385	ENSG00000253837	exon
chr12	110688571	-36.9192	0.0172394	HVCN1	exon	5'UTR			CpG_Shore_2kb_Upstream
chr20	25105731	-36.9025	0.0172472
chr16	88873126	-36.8888	0.0172536							CpG_Shelf_2-4kb_Upstream
chr22	21657302	-36.8412	0.0172758	ENSG00000207751				CpG: 102			promoter_+_strand	ENSG00000284630
chr9	131307745	36.8022	0.0172942	PLPP7					CpG_Shore_2kb_Upstream
chr21	45128900	-36.7822	0.0173036	ADARB1
chr9	136112122	36.7665	0.017311
chr19	50458730	36.7665	0.017311	MYBPC2	exon			CpG: 76
chr17	74842601	36.6541	0.017364	GRIN2C	exon				CpG_Shore_2kb_Upstream
chr8	126877095	36.6541	0.017364	PCAT1	exon
chr19	38142671	-36.6224	0.017379	SIPA1L3	exon
chr20	44187513	-36.6165	0.0173818								promoter_-_strand	JPH2
chr17	40191448	-36.5891	0.0173949	RAPGEFL1	exon			CpG: 36
chr3	13276764	-36.5891	0.0173949
chr16	57276770	36.5748	0.0174016	PLLP
chr6	15299927	36.5748	0.0174016	JARID2
chr17	31581243	36.5748	0.0174016
chr3	46706358	36.5748	0.0174016	TMIE
chr10	77636497	36.5748	0.0174016	KCNMA1	exon		3'UTR	CpG: 220
chr19	48552389	36.5462	0.0174152	SULT2B1
chr2	230985886	36.5462	0.0174152	SPATA3-AS1	exon				CpG_Shore_2kb_Upstream
chr1	37318172	36.4963	0.0174391	ENSG00000223944				CpG: 44
chr22	30249370	-36.4548	0.0174589							CpG_Shelf_2-4kb_Downstream
chr11	64448907	36.4437	0.0174642						CpG_Shore_2kb_Upstream		promoter_+_strand	LINC02724
chr22	44721808	36.4437	0.0174642	PRR5
chr19	8154230	36.3975	0.0174863
chr17	323246	36.3856	0.0174921	RPH3AL					CpG_Shore_2kb_Downstream
chr20	62739828	36.3849	0.0174924	NTSR1
chr7	164217	36.3849	0.0174924	ENSG00000261795	exon
chr19	1038665	36.3849	0.0174924	CNN2	exon		3'UTR		CpG_Shore_2kb_Upstream	CpG_Shelf_2-4kb_Downstream
chr6	157224761	36.3849	0.0174924
chr15	68577717	36.3611	0.0175039						CpG_Shore_2kb_Upstream
chr15	88911262	36.3504	0.017509	MFGE8					CpG_Shore_2kb_Upstream
chr1	63042426	-36.3393	0.0175144
chr1	41383743	-36.1592	0.0176016						CpG_Shore_2kb_Downstream
chr1	32338503	-36.0957	0.0176325						CpG_Shore_2kb_Downstream
chr1	22797858	-36.0808	0.0176397	EPHB2
chr11	131748926	-36.0808	0.0176397
chr18	3280039	-36.0784	0.0176409
chr17	73429848	36.0152	0.0176719	SDK2
chr7	36299934	36.0148	0.0176721	EEPD1	exon		3'UTR
chr6	378709	-36.0115	0.0176737
chr11	66232812	-35.9812	0.0176886	PACS1
chr22	20205379	35.9666	0.0176957								promoter_-_strand	LINC02891
chr4	183376525	35.9666	0.0176957
chr11	3169227	35.9666	0.0176957							CpG_Shelf_2-4kb_Downstream
chr7	157962039	35.9666	0.0176957	PTPRN2
chr16	85403265	35.9633	0.0176974
chr16	88756477	-35.9322	0.0177127	PIEZO1					CpG_Shore_2kb_Downstream
chr10	103837055	-35.914	0.0177216	SH3PXD2A
chr8	141401686	-35.829	0.0177637	PTP4A3
chr16	1942692	-35.8011	0.0177775	MSRB1				CpG: 84
chr4	67576137	35.6739	0.0178409	STAP1
chr1	156913646	35.655	0.0178503	PEAR1	exon
chr11	65557758	-35.61	0.0178729	LTBP3	exon				CpG_Shore_2kb_Upstream	CpG_Shelf_2-4kb_Downstream
chr22	38270770	-35.6076	0.0178741	TMEM184B					CpG_Shore_2kb_Upstream
chr13	98675341	-35.5784	0.0178887
chr9	130884392	-35.5631	0.0178964	ABL1	exon				CpG_Shore_2kb_Upstream
chr6	26342731	35.5516	0.0179022
chr1	21575467	-35.4912	0.0179326	ALPL
chr17	56578118	-35.3662	0.017996
chr16	85207331	-35.3412	0.0180087						CpG_Shore_2kb_Upstream
chr7	35505237	-35.3334	0.0180127	ENSG00000235464
chr12	6310199	35.2835	0.0180381						CpG_Shore_2kb_Upstream		promoter_+_strand	PLEKHG6
chr16	88610886	-35.27	0.018045	ZC3H18
chr11	125481522	-35.2532	0.0180537	FEZ1
chr2	208267795	35.2386	0.0180611	PIKFYVE					CpG_Shore_2kb_Downstream
chr12	130775833	35.1968	0.0180826	ENSG00000279650	exon
chr15	29115178	-35.1908	0.0180856	APBA2					CpG_Shore_2kb_Upstream
chr5	176197527	-35.1776	0.0180925	ENSG00000283235					CpG_Shore_2kb_Upstream	CpG_Shelf_2-4kb_Downstream
chr22	42314253	35.1586	0.0181022
chr19	38207601	35.1544	0.0181044	SIPA1L3	exon		3'UTR			CpG_Shelf_2-4kb_Upstream
chr7	150977402	-35.0906	0.0181372	KCNH2					CpG_Shore_2kb_Upstream	CpG_Shelf_2-4kb_Downstream
chr1	41381835	-34.8319	0.0182719	FOXO6	exon			CpG: 187
chr15	73042573	-34.8319	0.0182719
chr2	127633906	34.8196	0.0182783	MYO7B
chr5	154647415	34.8196	0.0182783					CpG: 32
chr19	3225576	-34.7883	0.0182948	CELF5	exon	5'UTR			CpG_Shore_2kb_Downstream	CpG_Shelf_2-4kb_Upstream
chr19	38063270	-34.7743	0.0183021	SIPA1L3
chr16	86198174	34.7706	0.0183041	ENSG00000268505	exon
chr1	47578525	-34.7537	0.018313
chr9	133133050	34.7248	0.0183282	ENSG00000285245
chr9	137305869	34.6708	0.0183568							CpG_Shelf_2-4kb_Downstream
chr6	43736207	-34.5824	0.0184037	ENSG00000236961
chr19	38543976	34.5725	0.0184089	RYR1
chr22	45896786	-34.5696	0.0184105
chr14	74531768	-34.4927	0.0184515	LTBP2
chr17	48156361	34.4809	0.0184578	SKAP1
chr9	88990141	34.4688	0.0184643						CpG_Shore_2kb_Upstream
chr7	460935	-34.4481	0.0184754						CpG_Shore_2kb_Upstream
chr22	39535345	34.4394	0.01848						CpG_Shore_2kb_Downstream	CpG_Shelf_2-4kb_Downstream
chr16	85602198	-34.373	0.0185157
chr1	156388485	-34.3418	0.0185325	ENSG00000237390				CpG: 49
chr17	44555433	-34.2761	0.018568							CpG_Shelf_2-4kb_Upstream
chr14	105445372	-34.2501	0.0185821	MTA1				CpG: 25	CpG_Shore_2kb_Upstream	CpG_Shelf_2-4kb_Upstream
chr11	67261361	-34.2097	0.018604	ENSG00000287934
chr17	6668343	-34.2097	0.018604	ALOX15P1
chr1	1158454	-34.2097	0.018604						CpG_Shore_2kb_Downstream
chr22	19999836	-34.2097	0.018604	ARVCF
chr19	56120118	34.1426	0.0186406	ZNF787					CpG_Shore_2kb_Upstream
chr20	31460597	-34.0583	0.0186867
chr19	1105278	34.0363	0.0186988	GPX4	exon			CpG: 446
chr20	36308100	-34.0214	0.0187069						CpG_Shore_2kb_Downstream
chr6	44256579	-33.997	0.0187204	SLC35B2					CpG_Shore_2kb_Upstream
chr8	130206690	33.981	0.0187292	ASAP1
chr4	2935492	33.981	0.0187292		exon				CpG_Shore_2kb_Downstream	CpG_Shelf_2-4kb_Downstream	promoter_-_strand	MFSD10
chr15	67818645	33.981	0.0187292							CpG_Shelf_2-4kb_Upstream
chr15	101618599	-33.9687	0.018736
chr6	26248926	33.9579	0.0187419						CpG_Shore_2kb_Upstream	CpG_Shelf_2-4kb_Upstream
chr18	79797807	-33.931	0.0187568	ENSG00000267780				CpG: 152		CpG_Shelf_2-4kb_Upstream	promoter_+_strand	KCNG2
chr12	5001046	-33.897	0.0187755	ENSG00000256654
chr16	81711938	33.8946	0.0187769
chr12	120584496	-33.8824	0.0187836						CpG_Shore_2kb_Upstream	CpG_Shelf_2-4kb_Downstream
chr1	39788076	-33.8647	0.0187935	BMP8B				CpG: 152			promoter_+_strand	ENSG00000261798
chr8	143397939	-33.8335	0.0188108
chr13	112087458	-33.8174	0.0188197	SOX1-OT
chr2	19350692	-33.7578	0.0188529						CpG_Shore_2kb_Upstream	CpG_Shelf_2-4kb_Downstream
chr1	6077651	-33.7408	0.0188624	KCNAB2
chr18	21978871	-33.7315	0.0188676
chr4	185820354	-33.7101	0.0188796	SORBS2
chr20	43296459	-33.6437	0.0189168
chr10	34792155	33.6312	0.0189238	PARD3
chr7	5348081	-33.6026	0.0189399	TNRC18						CpG_Shelf_2-4kb_Upstream
chr1	156076552	33.5432	0.0189735	MEX3A	exon		3'UTR	CpG: 90	CpG_Shore_2kb_Upstream
chr1	8990039	-33.5183	0.0189876
chr6	21941721	-33.5183	0.0189876	CASC15
chr1	153976852	-33.5183	0.0189876	JTB	exon	5'UTR			CpG_Shore_2kb_Upstream		promoter_-_strand	ENSG00000285779
chr10	121574455	33.5066	0.0189942	FGFR2
chr7	1385418	33.4511	0.0190257						CpG_Shore_2kb_Downstream
chr22	37345840	33.4262	0.0190399	ELFN2
chr9	124503331	33.4244	0.0190409	NR5A1	exon			CpG: 257
chr19	1593650	33.3737	0.0190698	ENSG00000267059					CpG_Shore_2kb_Downstream	CpG_Shelf_2-4kb_Downstream	promoter_-_strand	MBD3
chr22	49764341	33.3737	0.0190698					CpG: 20
chr16	88918767	33.3737	0.0190698	CBFA2T3						CpG_Shelf_2-4kb_Downstream
chr10	97138418	33.3721	0.0190707	SLIT1
chr11	117833551	-33.3374	0.0190905	FXYD6-FXYD2							promoter_+_strand	ENSG00000254528
chr11	67483566	33.3334	0.0190929	AIP	exon	5'UTR			CpG_Shore_2kb_Downstream
chr7	98284610	-33.3281	0.0190959	BRI3						CpG_Shelf_2-4kb_Downstream
chr9	109493773	-33.2915	0.0191169	PTPN3						CpG_Shelf_2-4kb_Upstream
chr9	130652115	-33.268	0.0191303	ENSG00000232172	exon
chr17	45257739	-33.2661	0.0191315	SPATA32
chr5	180328894	-33.2483	0.0191417	GFPT2
chr16	85615576	-33.2159	0.0191604	GSE1					CpG_Shore_2kb_Downstream
chr19	5048376	-33.1704	0.0191866	KDM4B					CpG_Shore_2kb_Upstream	CpG_Shelf_2-4kb_Downstream
chr8	143197315	33.0533	0.0192546
chr16	87381605	33.0372	0.0192639	FBXO31					CpG_Shore_2kb_Upstream
chr1	11061194	33.021	0.0192733						CpG_Shore_2kb_Downstream
chr14	102498614	33.0157	0.0192765	TECPR2	exon		3'UTR
chr12	122097671	-33.014	0.0192774	MLXIP
chr18	48592905	-32.9871	0.0192931	CTIF
chr9	137077614	-32.9805	0.019297	UAP1L1	exon			CpG: 213
chr19	11256417	-32.9805	0.019297	DOCK6
chr3	133412766	32.9232	0.0193306	BFSP2
chr1	241977505	-32.8814	0.0193551
chr9	94649770	-32.8633	0.0193658
chr12	106302255	-32.8502	0.0193735						CpG_Shore_2kb_Upstream		promoter_+_strand	TCP11L2
chr8	30228160	32.8359	0.0193819
chr19	929288	32.8359	0.0193819	ARID3A	exon	5'UTR			CpG_Shore_2kb_Upstream	CpG_Shelf_2-4kb_Upstream	promoter_-_strand	ENSG00000267159
chr9	134643766	32.8349	0.0193825	COL5A1					CpG_Shore_2kb_Downstream
chr19	7869769	32.7251	0.0194475	PRR36	exon			CpG: 145		CpG_Shelf_2-4kb_Upstream	promoter_+_strand	ENSG00000268120
chr19	49920952	32.6613	0.0194855	IL4I1
chr16	181656	32.6613	0.0194855					CpG: 156
chr9	113593636	-32.6524	0.0194908	RGS3	exon	5'UTR
chr9	133824943	-32.642	0.019497	VAV2
chr5	154608548	-32.6232	0.0195082						CpG_Shore_2kb_Upstream
chr11	20207966	-32.57	0.0195401
chr8	119586719	-32.563	0.0195443	ENPP2
chr16	1042908	-32.5327	0.0195625
chr9	137382735	-32.499	0.0195827	EXD3					CpG_Shore_2kb_Downstream	CpG_Shelf_2-4kb_Downstream
chr18	78935010	32.4628	0.0196046						CpG_Shore_2kb_Downstream
chr17	2214581	-32.436	0.0196208	SMG6
chr16	80540644	32.4038	0.0196402	DYNLRB2-AS1	exon				CpG_Shore_2kb_Upstream		promoter_+_strand	DYNLRB2
chr19	33235509	-32.3999	0.0196426						CpG_Shore_2kb_Upstream
chr6	15017420	32.3487	0.0196737
chr20	51307235	32.2612	0.019727
chr20	675236	32.2612	0.019727	SCRT2				CpG: 57	CpG_Shore_2kb_Upstream
chr5	62138843	-32.244	0.0197375
chr7	74270471	32.1422	0.0198
chr19	13825606	-32.1414	0.0198005	ZSWIM4	exon
chr16	85366261	-32.1235	0.0198115
chr20	18713139	-32.0968	0.0198279	DTD1
chr1	27514105	-32.0432	0.0198611
chr1	10668092	-32.02	0.0198755	CASZ1						CpG_Shelf_2-4kb_Downstream
chr1	1150174	-31.9013	0.0199494
chr18	55300792	31.8928	0.0199547	TCF4
chr11	61717401	31.8106	0.0200062	DAGLA						CpG_Shelf_2-4kb_Upstream
chr5	172533197	31.7995	0.0200132	ENSG00000287814
chr22	19691794	-31.7542	0.0200417
chr6	108311136	-31.7247	0.0200604	AFG1L
chr14	90456590	-31.7139	0.0200672	LINC00642	exon
chr5	141945789	31.7088	0.0200704	PCDH12	exon
chr11	776457	31.7088	0.0200704	GATD1					CpG_Shore_2kb_Upstream
chr22	17265152	31.7048	0.0200729	CECR3
chr17	42851221	-31.6978	0.0200774	AOC3	exon	5'UTR
chr9	123778715	-31.6539	0.0201052	DENND1A
chr15	68577823	31.6241	0.0201241						CpG_Shore_2kb_Upstream
chr15	64050533	-31.6088	0.0201339							CpG_Shelf_2-4kb_Downstream
chr18	58785261	-31.5889	0.0201465
chr20	62494976	31.5612	0.0201642
chr1	33182560	-31.5446	0.0201748						CpG_Shore_2kb_Downstream		promoter_-_strand	TRIM62
chr1	156291766	-31.5279	0.0201855	TMEM79	exon		3'UTR		CpG_Shore_2kb_Downstream
chr2	128305569	-31.5003	0.0202031	HS6ST1
chr1	16591876	31.4964	0.0202057	NBPF1	exon
chr5	93765	-31.4737	0.0202202	PLEKHG4B					CpG_Shore_2kb_Downstream
chr9	126534708	31.4707	0.0202222
chr3	196666716	31.4516	0.0202344
chr15	69814136	-31.4271	0.0202502
chr22	41412836	31.425	0.0202516						CpG_Shore_2kb_Upstream
chr6	106454233	-31.4212	0.020254	ENSG00000282408							promoter_+_strand	Y_RNA
chr1	10709228	-31.377	0.0202825	CASZ1
chr19	2273133	-31.3712	0.0202863	OAZ1	exon		3'UTR	CpG: 42	CpG_Shore_2kb_Upstream	CpG_Shelf_2-4kb_Upstream
chr14	105448648	31.2365	0.0203737	MTA1					CpG_Shore_2kb_Upstream	CpG_Shelf_2-4kb_Downstream
chr15	90665014	31.2071	0.0203929	CRTC3-AS1					CpG_Shore_2kb_Upstream
chr17	50593165	31.1999	0.0203976	CACNA1G
chr7	150964811	-31.199	0.0203982	KCNH2
chr8	9907266	31.087	0.0204716	MIR124-1HG					CpG_Shore_2kb_Downstream	CpG_Shelf_2-4kb_Downstream
chr16	88426110	31.0677	0.0204843	ZNF469						CpG_Shelf_2-4kb_Upstream
chr1	216804377	-31.0196	0.020516
chr19	49865472	-31.011	0.0205217	PNKP	exon				CpG_Shore_2kb_Upstream	CpG_Shelf_2-4kb_Downstream
chr17	48585297	30.9972	0.0205309	HOXB3						CpG_Shelf_2-4kb_Downstream
chr11	68122302	30.9272	0.0205773	CHKA-DT					CpG_Shore_2kb_Downstream		promoter_-_strand	CHKA
chr7	24895069	30.9272	0.0205773	OSBPL3
chr10	5598995	30.9272	0.0205773	LASTR
chr9	131336965	-30.9116	0.0205877
chr16	30084856	-30.8809	0.0206081	PPP4C
chr9	67066353	-30.8778	0.0206102	CNTNAP3P2
chr1	201946314	30.8685	0.0206164	LMOD1	exon	5'UTR
chr19	4878494	30.8685	0.0206164
chr11	119660820	30.8685	0.0206164
chr17	82077311	30.8685	0.0206164						CpG_Shore_2kb_Upstream	CpG_Shelf_2-4kb_Upstream
chr9	130444531	-30.7914	0.020668					CpG: 95			promoter_+_strand	ASS1
chr8	131411196	-30.7914	0.020668
chr8	142198399	30.7774	0.0206774	LINC00051	exon
chr20	63502957	30.7722	0.0206809	ENSG00000230226						CpG_Shelf_2-4kb_Downstream
chr5	514253	-30.7611	0.0206883	SLC9A3
chr19	7856032	-30.7599	0.0206892	EVI5L	exon
chr22	45010757	-30.7378	0.020704						CpG_Shore_2kb_Downstream
chr11	57322754	-30.7246	0.0207129	TNKS1BP1					CpG_Shore_2kb_Upstream
chr19	6481772	-30.7094	0.0207231	DENND1C	exon	5'UTR
chr1	11648891	-30.7094	0.0207231	FBXO2				CpG: 40	CpG_Shore_2kb_Upstream
chr1	228022647	30.6988	0.0207303	WNT3A
chr18	79384941	30.6988	0.0207303
chr8	144501853	-30.691	0.0207356	PPP1R16A	exon				CpG_Shore_2kb_Downstream	CpG_Shelf_2-4kb_Upstream
chr5	1227852	-30.6659	0.0207525	SLC6A18					CpG_Shore_2kb_Downstream
chr11	119976033	30.6522	0.0207618	ENSG00000286992	exon
chr16	73568902	30.6432	0.0207678	ENSG00000260848	exon
chr17	7115314	30.6432	0.0207678		exon	5'UTR					promoter_-_strand	ASGR2
chr15	90184172	30.5324	0.0208432						CpG_Shore_2kb_Upstream		promoter_+_strand	SEMA4B
chr20	62549875	30.4387	0.0209073	MIR1-1HG-AS1	exon				CpG_Shore_2kb_Upstream	CpG_Shelf_2-4kb_Upstream	promoter_+_strand	MIR1-1HG
chr7	22001373	-30.4342	0.0209104
chr11	115717298	-30.4273	0.0209151	LINC02698
chr17	79981436	30.4227	0.0209183	TBC1D16					CpG_Shore_2kb_Upstream	CpG_Shelf_2-4kb_Downstream
chr13	87675657	30.4227	0.0209183	SLITRK5	exon				CpG_Shore_2kb_Upstream	CpG_Shelf_2-4kb_Downstream
chr20	62254476	30.4227	0.0209183	OSBPL2
chr7	158382538	30.4227	0.0209183	PTPRN2
chr2	109046995	30.4227	0.0209183
chr16	86594352	-30.3597	0.0209616								promoter_+_strand	ENSG00000279142
chr1	7069927	-30.3595	0.0209618	CAMTA1
chr13	98202561	-30.3595	0.0209618	FARP1
chr16	30556266	30.3496	0.0209686	ZNF764					CpG_Shore_2kb_Upstream
chr12	48198769	-30.3427	0.0209734	ENSG00000269514	exon			CpG: 60
chr19	37855393	-30.3427	0.0209734					CpG: 36			promoter_-_strand	WDR87BP
chr17	2042879	30.2981	0.0210042	OVCA2	exon		3'UTR		CpG_Shore_2kb_Downstream		promoter_-_strand	ENSG00000287553
chr15	77631115	30.2981	0.0210042	LINGO1					CpG_Shore_2kb_Upstream	CpG_Shelf_2-4kb_Upstream
chr7	27144970	30.24	0.0210446	HOXA3				CpG: 202		CpG_Shelf_2-4kb_Upstream
chr14	103356679	30.24	0.0210446
chr11	125496746	30.232	0.0210502	ENSG00000255537	exon				CpG_Shore_2kb_Downstream
chr17	74211378	-30.2294	0.0210519	MGC16275	exon				CpG_Shore_2kb_Upstream	CpG_Shelf_2-4kb_Upstream
chr9	114225821	30.1971	0.0210744	COL27A1
chr20	50057606	-30.1307	0.0211209
chr19	5686559	30.1022	0.0211408	RPL36					CpG_Shore_2kb_Upstream	CpG_Shelf_2-4kb_Upstream
chr19	34967697	30.0531	0.0211753							CpG_Shelf_2-4kb_Downstream
chr8	144902996	30.042	0.0211831						CpG_Shore_2kb_Downstream
chr1	23794176	30.042	0.0211831	LYPLA2						CpG_Shelf_2-4kb_Downstream
chr2	11159765	-30.0343	0.0211886	SLC66A3						CpG_Shelf_2-4kb_Downstream
chr2	3657613	-30.0297	0.0211918								promoter_+_strand	ALLC
chr7	22500332	30.0145	0.0212026		exon	5'UTR		CpG: 46			promoter_-_strand	STEAP1B
chr10	71535379	29.9776	0.0212287	CDH23
chr1	22288211	29.9776	0.0212287							CpG_Shelf_2-4kb_Downstream
chr9	133397233	29.9776	0.0212287	STKLD1	exon
chr7	1818338	29.9776	0.0212287	MAD1L1					CpG_Shore_2kb_Downstream
chr7	100603744	29.9776	0.0212287	PCOLCE					CpG_Shore_2kb_Upstream
chr7	100456052	29.9757	0.02123
chr17	76122244	29.9757	0.02123					CpG: 69
chr12	49332716	29.933	0.0212602	C1QL4	exon		3'UTR		CpG_Shore_2kb_Upstream	CpG_Shelf_2-4kb_Upstream
chr3	55456339	-29.928	0.0212638
chr9	90976039	-29.928	0.0212638
chr17	335948	29.8294	0.021334	RPH3AL	exon				CpG_Shore_2kb_Downstream
chr7	75987488	29.8218	0.0213395	TMEM120A	exon
chr3	129621944	29.8218	0.0213395
chr1	3870049	-29.7087	0.0214207	DFFB
chr4	63219059	-29.665	0.0214522
chr19	40594499	-29.6459	0.021466							CpG_Shelf_2-4kb_Upstream
chr22	30386883	-29.6404	0.02147	RNF215	exon				CpG_Shore_2kb_Upstream
chr16	87806662	-29.6153	0.0214882								promoter_-_strand	ENSG00000260177
chr15	48520658	-29.607	0.0214942	FBN1
chr22	48537086	29.558	0.0215297	TAFA5
chr6	36981276	29.5223	0.0215558	MTCH1
chr8	30801189	29.5222	0.0215559	PPP2CB
chr20	53940422	29.5222	0.0215559	ENSG00000236352	exon		3'UTR
chr7	120562	29.522	0.021556	ENSG00000287883				CpG: 17		CpG_Shelf_2-4kb_Downstream
chr15	40911138	-29.5203	0.0215573
chr14	100573389	29.4934	0.0215769
chr9	132499049	-29.4848	0.0215832	CFAP77
chr17	40442803	29.4551	0.0216049						CpG_Shore_2kb_Upstream		promoter_+_strand	IGFBP4
chr1	241356370	-29.4439	0.0216132	RGS7					CpG_Shore_2kb_Upstream		promoter_+_strand	ENSG00000286496
chr10	118286339	-29.4143	0.0216349
chr17	925220	29.3709	0.0216668	NXN
chr20	25085257	29.3709	0.0216668						CpG_Shore_2kb_Downstream	CpG_Shelf_2-4kb_Downstream
chr17	75204809	29.3709	0.0216668						CpG_Shore_2kb_Upstream		promoter_+_strand	NUP85
chr19	47275795	-29.3653	0.021671						CpG_Shore_2kb_Downstream
chr22	49720252	29.3602	0.0216747	ENSG00000226954	exon
chr4	185099523	29.3537	0.0216795		exon
chr17	71975378	-29.3419	0.0216882
chr19	5542916	29.3341	0.021694
chr14	103520755	-29.3215	0.0217033	CKB				CpG: 322
chr11	68384208	-29.3028	0.0217171	LRP5						CpG_Shelf_2-4kb_Upstream
chr11	7665964	29.3018	0.0217179	CYB5R2	exon
chr20	63858645	-29.2711	0.0217407							CpG_Shelf_2-4kb_Upstream
chr1	47768145	-29.2711	0.0217407	TRABD2B
chr16	989490	-29.2711	0.0217407						CpG_Shore_2kb_Upstream	CpG_Shelf_2-4kb_Downstream
chr20	56707513	-29.2711	0.0217407
chr8	1897136	29.2423	0.0217621	ARHGEF10
chr14	103157324	29.215	0.0217823
chr17	32517668	-29.2137	0.0217834	ENSG00000263717					CpG_Shore_2kb_Upstream
chr7	156893808	-29.2137	0.0217834						CpG_Shore_2kb_Downstream		promoter_-_strand	LMBR1
chr9	26220139	29.1726	0.021814
chr1	1245586	-29.1398	0.0218385	C1QTNF12					CpG_Shore_2kb_Upstream	CpG_Shelf_2-4kb_Downstream
chr1	28815741	-29.1268	0.0218483	OPRD1						CpG_Shelf_2-4kb_Downstream
chr11	18790967	-29.0937	0.0218731	PTPN5					CpG_Shore_2kb_Upstream
chr4	3499845	-29.0937	0.0218731						CpG_Shore_2kb_Upstream	CpG_Shelf_2-4kb_Upstream
chr12	47735115	-29.0638	0.0218956	RAPGEF3	exon		3'UTR
chr16	85276961	29.0608	0.0218978	ENSG00000287787
chr19	45252226	29.0171	0.0219308	MARK4					CpG_Shore_2kb_Downstream
chr19	54462823	29.0148	0.0219326	LENG9	exon				CpG_Shore_2kb_Upstream
chr1	11486373	-28.9892	0.0219518	DISP3
chr18	46919378	-28.9855	0.0219547	KATNAL2					CpG_Shore_2kb_Downstream
chr10	89208579	-28.9855	0.0219547						CpG_Shore_2kb_Downstream
chr7	959347	28.9681	0.0219678
chr9	136685199	-28.9537	0.0219788	AGPAT2					CpG_Shore_2kb_Upstream	CpG_Shelf_2-4kb_Upstream
chr14	105092609	28.9492	0.0219822						CpG_Shore_2kb_Upstream
chr16	57061726	-28.9383	0.0219905	NLRC5	exon
chr8	546526	28.9226	0.0220024						CpG_Shore_2kb_Downstream
chr1	150553023	-28.906	0.022015	ADAMTSL4	exon					CpG_Shelf_2-4kb_Downstream
chr1	1245652	-28.906	0.022015	C1QTNF12					CpG_Shore_2kb_Upstream	CpG_Shelf_2-4kb_Downstream
chr19	1826710	28.8877	0.0220289	REXO1					CpG_Shore_2kb_Upstream
chr16	75245542	28.8807	0.0220343	BCAR1
chr19	40226325	-28.8603	0.0220499	CCNP				CpG: 57	CpG_Shore_2kb_Downstream	CpG_Shelf_2-4kb_Downstream
chr3	101635580	28.8314	0.0220719
chr5	75237173	-28.7919	0.0221022						CpG_Shore_2kb_Downstream		promoter_-_strand	ANKRD31
chr16	85167780	-28.7919	0.0221022						CpG_Shore_2kb_Upstream	CpG_Shelf_2-4kb_Upstream
chr17	80082772	-28.7915	0.0221025	CCDC40
chr11	76655486	28.7705	0.0221186	ENSG00000254810
chr20	11777886	-28.7645	0.0221232
chr3	149812509	28.7597	0.0221269	ANKUB1				CpG: 76			promoter_+_strand	RNF13
chr5	5495261	28.7582	0.0221281					CpG: 17
chr8	143991025	-28.74	0.0221421	GRINA	exon	5'UTR		CpG: 126
chr16	1324575	-28.7383	0.0221434	UBE2I
chr2	129078163	28.6956	0.0221763
chr2	16509272	28.6754	0.0221919						CpG_Shore_2kb_Downstream
chr1	224175760	-28.6529	0.0222093		exon	5'UTR					promoter_-_strand	ENSG00000236773
chr15	40952541	28.5759	0.0222691						CpG_Shore_2kb_Upstream		promoter_+_strand	CHAC1
chr16	51122196	28.4674	0.0223539
chr7	135714808	28.4674	0.0223539	SLC13A4
chr8	141118177	28.4592	0.0223604
chr17	58338362	28.4331	0.0223809	TSPOAP1-AS1
chr10	132229970	-28.4299	0.0223834	STK32C					CpG_Shore_2kb_Downstream	CpG_Shelf_2-4kb_Downstream
chr20	2692261	28.3614	0.0224374					CpG: 219
chr17	74316432	-28.3608	0.0224379
chr8	42265868	-28.3219	0.0224686	IKBKB-DT	exon
chr21	44378012	28.2776	0.0225038	TRPM2
chr2	1594753	-28.2746	0.0225062	ENSG00000228613
chr19	5113157	28.2743	0.0225065	KDM4B	exon		3'UTR			CpG_Shelf_2-4kb_Downstream
chr19	55452342	-28.2727	0.0225077					CpG: 135
chr7	460256	28.2659	0.0225131							CpG_Shelf_2-4kb_Upstream
chr19	47013409	28.2633	0.0225152
chr2	241859949	28.2633	0.0225152							CpG_Shelf_2-4kb_Upstream
chr10	100655784	28.2633	0.0225152					CpG: 138		CpG_Shelf_2-4kb_Upstream
chr9	98317218	-28.2438	0.0225308	GABBR2
chr22	20238286	28.2357	0.0225372							CpG_Shelf_2-4kb_Upstream
chr19	3057588	-28.2161	0.0225529	TLE5	exon					CpG_Shelf_2-4kb_Upstream
chr20	23257253	-28.2091	0.0225585
chr3	149556090	28.203	0.0225633	WWTR1
chr19	49415969	-28.201	0.0225649	KASH5
chr15	73318881	-28.1968	0.0225683					CpG: 29
chr16	50445751	-28.1968	0.0225683	ENSG00000260573
chr16	88745316	-28.1903	0.0225735	ENSG00000182376	exon
chr1	32872446	-28.1738	0.0225867	FNDC5	exon	5'UTR			CpG_Shore_2kb_Downstream
chr7	36300117	28.1694	0.0225902	EEPD1	exon		3'UTR
chr17	80980200	-28.169	0.0225905
chr19	46367479	-28.1662	0.0225927	PPP5C
chr14	64766725	28.1432	0.0226112	SPTB	exon
chr1	3012056	28.1432	0.0226112						CpG_Shore_2kb_Upstream
chr1	22854073	-28.0968	0.0226485	EPHB2
chr11	86671711	-28.0729	0.0226678	ME3	exon			CpG: 82
chr2	236087724	28.0682	0.0226716	AGAP1
chr13	112216214	28.0603	0.022678
chr10	95295661	28.0603	0.022678					CpG: 33
chr5	179857818	28.0603	0.022678	MRNIP					CpG_Shore_2kb_Upstream
chr17	64059530	28.0603	0.022678	ERN1
chr8	56447042	28.0603	0.022678	PENK-AS1					CpG_Shore_2kb_Upstream		promoter_-_strand	PENK
chr11	291899	28.0589	0.0226791	PGGHG	exon				CpG_Shore_2kb_Downstream	CpG_Shelf_2-4kb_Downstream
chr14	95011688	28.0548	0.0226824
chr19	45817865	28.0302	0.0227023	SYMPK					CpG_Shore_2kb_Downstream
chr15	73951895	-27.991	0.022734	LOXL1	exon		3'UTR
chr7	2863742	27.9598	0.0227594
chr16	88461635	27.9253	0.0227875	ZFPM1
chr8	144048417	-27.9117	0.0227986					CpG: 423	CpG_Shore_2kb_Downstream		promoter_+_strand	SMPD5
chr20	56712419	-27.8718	0.0228312
chr10	133161365	27.8698	0.0228329	KNDC1	exon		3'UTR		CpG_Shore_2kb_Downstream	CpG_Shelf_2-4kb_Upstream
chr21	44980468	27.7996	0.0228904
chr3	127914764	27.7996	0.0228904						CpG_Shore_2kb_Upstream		promoter_+_strand	KBTBD12
chr6	100472769	-27.7816	0.0229052							CpG_Shelf_2-4kb_Downstream
chr12	132277939	-27.7807	0.022906	ENSG00000256542	exon				CpG_Shore_2kb_Upstream
chr19	17282744	-27.7807	0.022906	ANKLE1	exon	5'UTR	3'UTR	CpG: 116
chr20	63697177	-27.7547	0.0229274	TNFRSF6B	exon		3'UTR	CpG: 50
chr2	47205743	-27.7475	0.0229334	EPCAM-DT
chr19	49512269	27.6991	0.0229734						CpG_Shore_2kb_Upstream		promoter_+_strand	FCGRT
chr11	1092436	27.6991	0.0229734	MUC2	exon
chr11	67888261	-27.6672	0.0229999	LINC02754	exon
chr17	43386413	27.6624	0.0230039	LINC00910	exon
chr12	105628297	27.6552	0.0230099
chr1	3543384	27.6439	0.0230193	MEGF6				CpG: 28
chr7	1289992	27.6339	0.0230276					CpG: 68	CpG_Shore_2kb_Downstream
chr4	998193	27.616	0.0230425	IDUA					CpG_Shore_2kb_Downstream	CpG_Shelf_2-4kb_Upstream
chr2	20510181	-27.5599	0.0230894
chr1	114122931	-27.5313	0.0231134	SYT6
chr11	39155956	27.5187	0.0231239	ENSG00000285751
chr5	1851011	-27.4968	0.0231423	ENSG00000249966	exon				CpG_Shore_2kb_Upstream
chr22	48701777	-27.4873	0.0231503	TAFA5
chr10	103397527	-27.4613	0.0231722	PDCD11					CpG_Shore_2kb_Downstream
chr20	64084262	-27.4482	0.0231833	LKAAEAR1	exon	5'UTR		CpG: 115	CpG_Shore_2kb_Upstream	CpG_Shelf_2-4kb_Upstream
chr19	48332811	-27.4482	0.0231833	TMEM143	exon		3'UTR		CpG_Shore_2kb_Upstream	CpG_Shelf_2-4kb_Downstream
chr17	72237382	-27.4128	0.0232131
chr11	131584866	27.4115	0.0232143
chr20	45450355	27.4018	0.0232224		exon		3'UTR
chr4	8200868	-27.3922	0.0232306	SH3TC1
chr11	70077939	-27.3905	0.0232321						CpG_Shore_2kb_Upstream		promoter_+_strand	ANO1
chr21	45972469	27.3574	0.0232602						CpG_Shore_2kb_Upstream
chr1	235648720	-27.3078	0.0233023	GNG4				CpG: 208		CpG_Shelf_2-4kb_Upstream
chr16	69529817	27.3003	0.0233087
chr2	222310976	27.2991	0.0233097						CpG_Shore_2kb_Upstream
chr17	79925828	27.2991	0.0233097	LINC01978	exon				CpG_Shore_2kb_Upstream
chr5	157574560	27.2991	0.0233097	ADAM19				CpG: 22	CpG_Shore_2kb_Upstream
chr19	7970859	27.2942	0.0233139	ELAVL1
chr3	14793714	27.2758	0.0233297
chr4	791974	27.1918	0.0234016	CPLX1						CpG_Shelf_2-4kb_Upstream
chr8	1574439	27.1579	0.0234308	DLGAP2
chr22	27270929	-27.1365	0.0234493
chr16	88386396	27.0614	0.0235143	ZNF469					CpG_Shore_2kb_Upstream	CpG_Shelf_2-4kb_Downstream
chr7	988742	27.0614	0.0235143	CYP2W1	exon		3'UTR		CpG_Shore_2kb_Upstream	CpG_Shelf_2-4kb_Downstream
chr14	77032775	27.0585	0.0235168	ENSG00000289347	exon				CpG_Shore_2kb_Upstream
chr1	204576521	-27.0405	0.0235324
chr15	27328754	27.0224	0.0235482	GABRG3
chr17	44657475	26.9962	0.0235711	MEIOC					CpG_Shore_2kb_Downstream
chr19	51002188	-26.9621	0.0236009	KLK8					CpG_Shore_2kb_Upstream
chr8	22082167	-26.9478	0.0236134	DMTN	exon		3'UTR
chr17	74215670	26.851	0.0236984	TTYH2	exon				CpG_Shore_2kb_Downstream	CpG_Shelf_2-4kb_Downstream
chr17	79922194	-26.8485	0.0237006	LINC01978
chr17	78981664	-26.8418	0.0237066
chr11	62544100	26.8316	0.0237156	AHNAK					CpG_Shore_2kb_Upstream	CpG_Shelf_2-4kb_Upstream
chr7	2641848	26.7977	0.0237455	TTYH3							promoter_+_strand	ENSG00000288792
chr16	87186638	26.7793	0.0237618
chr22	30264406	-26.7713	0.0237689	OSM	exon		3'UTR
chr19	11767962	-26.7406	0.0237961	ZNF441					CpG_Shore_2kb_Downstream
chr3	184059681	-26.714	0.0238198	HTR3C
chr22	24181218	-26.6756	0.0238541								promoter_+_strand	SUSD2
chr12	12718992	-26.6756	0.0238541	CDKN1B	exon		3'UTR		CpG_Shore_2kb_Downstream
chr19	49525246	-26.6715	0.0238577	FCGRT	exon		3'UTR		CpG_Shore_2kb_Downstream	CpG_Shelf_2-4kb_Upstream
chr22	42768886	-26.6715	0.0238577						CpG_Shore_2kb_Upstream
chr19	35114977	26.6225	0.0239016	ENSG00000285526							promoter_+_strand	FXYD3
chr16	85517651	26.6164	0.0239071						CpG_Shore_2kb_Upstream
chr9	74220552	-26.565	0.0239533
chr3	9248414	-26.5637	0.0239545	SRGAP3
chr16	2239054	-26.5582	0.0239594						CpG_Shore_2kb_Downstream	CpG_Shelf_2-4kb_Downstream
chr12	132400307	-26.5559	0.0239615					CpG: 20	CpG_Shore_2kb_Downstream	CpG_Shelf_2-4kb_Downstream
chr17	19511188	-26.5511	0.0239658							CpG_Shelf_2-4kb_Downstream
chr17	50185638	-26.5371	0.0239784	COL1A1	exon
chr19	4043076	-26.5321	0.023983						CpG_Shore_2kb_Upstream
chr4	19100743	-26.5321	0.023983
chr9	33722030	-26.5321	0.023983	ENSG00000227301	exon
chr1	150975581	26.5293	0.0239855						CpG_Shore_2kb_Downstream		promoter_-_strand	CERS2
chr1	38529624	-26.5288	0.023986
chr16	51577694	26.5278	0.0239868	HNRNPA1P48
chr14	64737337	-26.5232	0.023991	PLEKHG3	exon
chr2	16197188	26.5018	0.0240104
chr19	3545209	-26.4789	0.0240311	MFSD12					CpG_Shore_2kb_Upstream	CpG_Shelf_2-4kb_Upstream
chr11	120627574	-26.4469	0.0240601	GRIK4
chr22	44893926	26.3281	0.0241686	PHF21B
chr11	62669286	26.322	0.0241742	LBHD1						CpG_Shelf_2-4kb_Upstream	promoter_+_strand	UQCC3
chr2	102704818	-26.3177	0.0241782	SLC9A2
chr9	133842362	26.2885	0.024205	VAV2
chr14	77966382	-26.2767	0.0242159					CpG: 37
chr14	42475517	-26.2646	0.024227	ENSG00000258394
chr1	27873071	26.2641	0.0242275	THEMIS2					CpG_Shore_2kb_Downstream
chr7	74094290	-26.2166	0.0242713	LIMK1	exon
chr7	148370393	-26.1976	0.0242889	CNTNAP2
chr1	229863894	-26.1515	0.0243317	LINC01682
chr3	138935880	-26.1253	0.024356	LINC01391	exon				CpG_Shore_2kb_Upstream
chr7	55188752	26.1166	0.0243642	EGFR
chr9	101384969	-26.0971	0.0243824		exon	5'UTR
chr17	81310063	26.081	0.0243974					CpG: 22	CpG_Shore_2kb_Upstream		promoter_-_strand	LINC00482
chr21	39715923	-26.0803	0.0243981	ENSG00000225330
chr21	43361843	26.0745	0.0244034		exon				CpG_Shore_2kb_Upstream		promoter_-_strand	LINC01679
chr9	131372961	26.0453	0.0244308						CpG_Shore_2kb_Upstream
chr14	41214879	-26.0174	0.0244569
chr22	39231912	26.0098	0.0244641	PDGFB					CpG_Shore_2kb_Downstream
chr22	37907082	25.9878	0.0244848	MICALL1	exon				CpG_Shore_2kb_Downstream
chr19	43274888	-25.9796	0.0244925
chr15	22951089	25.9757	0.0244962	CYFIP1
chr10	86144066	25.9757	0.0244962	GRID1
chr17	61394368	25.9745	0.0244973	ENSG00000267131					CpG_Shore_2kb_Upstream
chr3	50338067	-25.9672	0.0245042	RASSF1-AS1	exon			CpG: 130		CpG_Shelf_2-4kb_Upstream
chr20	1895874	-25.9324	0.024537	SIRPA					CpG_Shore_2kb_Downstream
chr2	2850634	-25.9288	0.0245405
chr10	119502569	-25.9079	0.0245602	RGS10
chr8	67358614	-25.8959	0.0245716
chr9	14869007	-25.8678	0.0245983	FREM1	exon	5'UTR
chr9	135104772	-25.8464	0.0246186	OLFM1					CpG_Shore_2kb_Upstream
chr17	81329817	25.8393	0.0246254	TMEM105
chr9	137055796	-25.8206	0.0246432						CpG_Shore_2kb_Downstream
chr8	143852653	-25.7998	0.024663
chr12	113055749	25.7558	0.0247051						CpG_Shore_2kb_Upstream		promoter_+_strand	DTX1
chr7	74018794	25.7558	0.0247051
chr11	116181177	-25.7175	0.0247419
chr15	73951957	-25.7131	0.0247461	LOXL1	exon		3'UTR
chr8	144333417	-25.7117	0.0247475	SCRT1	exon			CpG: 584			promoter_+_strand	SLC52A2
chr16	58049000	-25.7067	0.0247522							CpG_Shelf_2-4kb_Downstream
chr13	111670177	25.7048	0.0247541	ENSG00000204398					CpG_Shore_2kb_Downstream
chr11	134978747	-25.7038	0.024755	ENSG00000287251
chr19	48760730	-25.6424	0.0248143
chr6	142845845	-25.6424	0.0248143	HIVEP2
chr13	112901398	25.616	0.0248398							CpG_Shelf_2-4kb_Downstream
chr8	38139933	-25.6066	0.024849		exon		3'UTR
chr2	102141615	25.6054	0.0248501						CpG_Shore_2kb_Upstream
chr20	45926045	25.5407	0.024913
chr10	98415084	25.5402	0.0249135	PYROXD2	exon
chr9	131113873	-25.5365	0.0249171	AIF1L
chr2	240570106	-25.5365	0.0249171	RNPEPL1					CpG_Shore_2kb_Downstream	CpG_Shelf_2-4kb_Upstream
chr7	76393876	-25.522	0.0249312	SSC4D	exon				CpG_Shore_2kb_Downstream	CpG_Shelf_2-4kb_Upstream
chr8	143278845	-25.5099	0.024943					CpG: 73	CpG_Shore_2kb_Downstream
chr16	3101964	25.505	0.0249478
chr17	76529937	-25.5008	0.0249519	CYGB
chr22	21450325	-25.4998	0.0249529	HIC2	exon		3'UTR			CpG_Shelf_2-4kb_Downstream
chr1	25197375	-25.4823	0.02497
chr1	37735488	-25.4643	0.0249877	EPHA10
chr3	193879337	25.4309	0.0250204
chr1	94095586	-25.4161	0.025035	ABCA4
chr18	79797219	-25.4036	0.0250472	ENSG00000267780					CpG_Shore_2kb_Upstream	CpG_Shelf_2-4kb_Upstream	promoter_+_strand	KCNG2
chr1	22185472	-25.3999	0.0250509
chr2	37875470	-25.3797	0.0250708	LINC00211
chr16	660592	-25.3721	0.0250783	WDR90	exon				CpG_Shore_2kb_Upstream	CpG_Shelf_2-4kb_Upstream
chr11	796260	-25.3571	0.0250932	SLC25A22	exon	5'UTR			CpG_Shore_2kb_Upstream	CpG_Shelf_2-4kb_Downstream
chr6	220092	-25.3559	0.0250943
chr10	101092868	-25.3464	0.0251038	TLX1NB
chr22	37212730	-25.3237	0.0251263								promoter_-_strand	SSTR3
chr7	27239141	25.3157	0.0251342						CpG_Shore_2kb_Upstream	CpG_Shelf_2-4kb_Upstream
chr18	47176470	-25.2988	0.0251509						CpG_Shore_2kb_Downstream		promoter_-_strand	ENSG00000267228
chr19	35994209	-25.2797	0.0251699					CpG: 43	CpG_Shore_2kb_Upstream		promoter_+_strand	SDHAF1
chr16	81711859	-25.2436	0.0252059
chr10	122427012	25.2321	0.0252174	PLEKHA1	exon
chr4	57043861	-25.2053	0.0252441	IGFBP7
chr15	67011439	-25.2049	0.0252445	ENSG00000259347
chr17	1604941	-25.1961	0.0252533	SLC43A2	exon	5'UTR			CpG_Shore_2kb_Upstream		promoter_-_strand	RN7SL105P
chr16	2033473	-25.1861	0.0252633	SLC9A3R2						CpG_Shelf_2-4kb_Upstream
chr16	88917549	25.1695	0.02528	CBFA2T3					CpG_Shore_2kb_Downstream
chr14	99570718	-25.1303	0.0253194	CCDC85C
chr9	135960502	-25.1143	0.0253355	UBAC1					CpG_Shore_2kb_Upstream
chr19	838966	25.1081	0.0253417							CpG_Shelf_2-4kb_Downstream
chr6	38984741	-25.0894	0.0253607	DNAH8
chr16	85750265	-25.0845	0.0253656	C16orf74				CpG: 130
chr19	950575	25.0752	0.025375	ARID3A					CpG_Shore_2kb_Downstream	CpG_Shelf_2-4kb_Downstream
chr10	132975110	25.067	0.0253833	LINC01168						CpG_Shelf_2-4kb_Upstream
chr13	29937536	25.067	0.0253833	LINC00544
chr19	55525921	-25.0654	0.0253849							CpG_Shelf_2-4kb_Upstream
chr3	8554943	25.0514	0.025399	LMCD1
chr22	19177604	25.0494	0.025401	SLC25A1				CpG: 171
chr22	25774764	-24.9976	0.0254536	MYO18B
chr3	115317697	-24.9686	0.0254832	ENSG00000242880
chr11	64263744	-24.949	0.0255032	PLCB3	exon					CpG_Shelf_2-4kb_Upstream
chr2	120722323	24.9314	0.0255212
chr19	56120023	-24.9251	0.0255276	ZNF787					CpG_Shore_2kb_Upstream
chr19	3397389	24.8842	0.0255695	NFIC					CpG_Shore_2kb_Upstream
chr2	10283180	-24.871	0.0255831
chr1	53120176	-24.863	0.0255913	SLC1A7
chr16	72964098	-24.8109	0.025645	ZFHX3
chr17	2398852	-24.8105	0.0256454	MNT					CpG_Shore_2kb_Upstream
chr10	3749795	24.8047	0.0256514	ENSG00000229672
chr3	43769815	-24.7797	0.0256773
chr1	26316180	24.7644	0.0256931
chr7	150401269	24.7644	0.0256931	ENSG00000284048						CpG_Shelf_2-4kb_Upstream
chr16	70679765	24.7625	0.025695	MTSS2				CpG: 75
chr9	32817796	24.7625	0.025695
chr15	100766443	24.7505	0.0257076	ENSG00000259579
chr17	46785515	24.7441	0.0257141	WNT3
chr1	17201745	-24.7313	0.0257275								promoter_-_strand	ENSG00000282843
chr16	86241819	24.7017	0.0257583	LINC01081
chr5	176811430	24.6751	0.025786	UNC5A					CpG_Shore_2kb_Downstream
chr16	800320	-24.6516	0.0258106	GNG13				CpG: 48
chr20	32907915	-24.6446	0.0258179	EFCAB8
chr16	86741467	-24.6385	0.0258242		exon
chr5	472135	24.6325	0.0258305	PP7080	exon		3'UTR		CpG_Shore_2kb_Upstream
chr21	36917714	-24.5851	0.0258802	HLCS
chr8	143095273	-24.5505	0.0259167
chr3	127157857	-24.5359	0.0259321
chr11	114254744	-24.5144	0.0259549	ZBTB16	exon		3'UTR
chr16	57372752	-24.5144	0.0259549	CX3CL1
chr19	19462002	24.4937	0.0259767	GATAD2A
chr2	42369781	-24.4876	0.0259832								promoter_-_strand	COX7A2L
chr3	71049275	24.4748	0.0259968	FOXP1
chr2	10304853	-24.4702	0.0260016	HPCAL1					CpG_Shore_2kb_Downstream
chr18	51668377	-24.4702	0.0260016
chr20	19975172	-24.4702	0.0260016	RIN2	exon			CpG: 37
chr19	42256487	24.4657	0.0260064						CpG_Shore_2kb_Downstream
chr3	191260548	24.4622	0.0260101	OSTN
chr12	51921165	-24.4619	0.0260104	ACVRL1	exon		3'UTR
chr19	45212062	24.4527	0.0260203
chr8	144181130	-24.4265	0.0260481	MROH1					CpG_Shore_2kb_Downstream
chr4	186701943	24.4091	0.0260666	ENSG00000287169
chr19	4878702	24.4091	0.0260666
chr3	129306357	24.4091	0.0260666
chr5	344157	24.4091	0.0260666	AHRR				CpG: 98
chr12	132457171	24.4091	0.0260666	ENSG00000256783	exon
chr19	4063675	24.4091	0.0260666	ZBTB7A					CpG_Shore_2kb_Upstream	CpG_Shelf_2-4kb_Downstream	promoter_-_strand	ENSG00000268670
chr2	56472742	-24.392	0.0260849
chr9	98840040	-24.392	0.0260849	GALNT12	exon
chr8	140608470	-24.392	0.0260849	AGO2
chr16	71341	24.3795	0.0260983	RHBDF1					CpG_Shore_2kb_Upstream
chr14	104679241	24.377	0.0261009						CpG_Shore_2kb_Downstream
chr6	169251927	-24.3479	0.0261321	THBS2						CpG_Shelf_2-4kb_Downstream
chr10	103452387	-24.3291	0.0261523	CALHM2	exon	5'UTR		CpG: 31		CpG_Shelf_2-4kb_Upstream	promoter_+_strand	ENSG00000234699
chr11	396113	-24.3277	0.0261538	PKP3					CpG_Shore_2kb_Upstream	CpG_Shelf_2-4kb_Upstream
chr11	134039077	-24.2128	0.0262778	LINC02731	exon				CpG_Shore_2kb_Downstream
chr4	2812216	24.1876	0.0263051	SH3BP2
chr12	107581263	-24.1849	0.026308	BTBD11	exon			CpG: 46
chr7	4170885	-24.1849	0.026308	SDK1
chr20	32433818	-24.1829	0.0263102	ASXL1	exon
chr19	49429197	-24.1817	0.0263115						CpG_Shore_2kb_Upstream	CpG_Shelf_2-4kb_Upstream
chr1	10666575	24.1553	0.0263403	CASZ1					CpG_Shore_2kb_Downstream
chr10	86970434	-24.1267	0.0263714	ADIRF	exon				CpG_Shore_2kb_Upstream		promoter_+_strand	ENSG00000271880
chr6	36024149	-24.1233	0.0263751	SLC26A8						CpG_Shelf_2-4kb_Upstream
chr1	6451226	24.1153	0.0263838	ESPN					CpG_Shore_2kb_Upstream	CpG_Shelf_2-4kb_Upstream
chr20	50292631	24.1153	0.0263838								promoter_+_strand	LINC01270
chr1	3457568	-24.0901	0.0264114	ARHGEF16						CpG_Shelf_2-4kb_Downstream
chr15	94287990	-24.0761	0.0264268	MCTP2
chr1	2189936	-24.05	0.0264554	FAAP20	exon			CpG: 55
chr8	80766835	-24.05	0.0264554	ZNF704
chr20	47337244	-24.05	0.0264554	ZMYND8
chr18	78788212	-24.0401	0.0264664
chr21	43357886	23.9937	0.0265174
chr9	136247463	-23.9328	0.0265848						CpG_Shore_2kb_Downstream	CpG_Shelf_2-4kb_Upstream
chr16	84842996	-23.9198	0.0265993	CRISPLD2
chr11	64607258	-23.899	0.0266224	NRXN2	exon				CpG_Shore_2kb_Upstream
chr3	42024052	23.8728	0.0266516
chr10	133268503	23.8631	0.0266624	ADAM8					CpG_Shore_2kb_Upstream
chr4	6657375	-23.8419	0.0266861	LINC02482					CpG_Shore_2kb_Upstream
chr5	176693511	23.8063	0.0267259
chr5	170504461	-23.7567	0.0267817	KCNIP1	exon	5'UTR		CpG: 64
chr10	78859926	-23.7485	0.0267909
chr16	10622508	-23.7059	0.026839
chr1	212571871	23.6939	0.0268525	ATF3
chr6	36735824	23.6939	0.0268525
chr22	43036657	-23.6871	0.0268603
chr17	74310043	23.6635	0.026887	DNAI2	exon		3'UTR				promoter_-_strand	ENSG00000266106
chr12	114736997	23.6635	0.026887	TBX3-AS1				CpG: 83			promoter_+_strand	ENSG00000252459
chr19	7869092	23.6538	0.0268981	PRR36	exon		3'UTR	CpG: 145		CpG_Shelf_2-4kb_Upstream
chr6	89920682	23.6488	0.0269038
chr19	2518500	-23.6471	0.0269057	GNG7
chr15	101496079	23.6388	0.0269151								promoter_-_strand	ENSG00000274139
chr20	63469711	23.6323	0.0269225	KCNQ2					CpG_Shore_2kb_Upstream	CpG_Shelf_2-4kb_Downstream
chr22	21442855	-23.613	0.0269445	HIC2	exon					CpG_Shelf_2-4kb_Upstream
chr22	39350844	23.5875	0.0269735	SYNGR1					CpG_Shore_2kb_Downstream
chr16	88428261	23.5702	0.0269934	ZNF469	exon				CpG_Shore_2kb_Upstream	CpG_Shelf_2-4kb_Upstream
chr7	1370060	-23.567	0.026997						CpG_Shore_2kb_Downstream
chr6	138382699	23.5637	0.0270008	SMIM28	exon
chr2	193565	23.5637	0.0270008							CpG_Shelf_2-4kb_Upstream
chr21	42312386	23.5448	0.0270224	TFF3
chr22	17772501	23.5448	0.0270224	BID					CpG_Shore_2kb_Upstream
chr15	77820831	23.5342	0.0270345		exon	5'UTR			CpG_Shore_2kb_Downstream
chr19	48530549	23.5323	0.0270368
chr1	1145218	23.5323	0.0270368
chr9	109167666	23.5323	0.0270368						CpG_Shore_2kb_Downstream		promoter_-_strand	FRRS1L
chr15	89435574	-23.5047	0.0270685
chr15	73771930	23.4996	0.0270743
chr3	138350212	23.4958	0.0270787	MRAS	exon				CpG_Shore_2kb_Downstream
chr9	16872228	-23.4909	0.0270843						CpG_Shore_2kb_Downstream
chr7	157979681	23.4594	0.0271207	PTPRN2
chr1	212588423	23.4444	0.027138	ATF3
chr1	228109667	-23.4424	0.0271403						CpG_Shore_2kb_Downstream		promoter_-_strand	MRPL55
chr22	19769010	-23.4289	0.027156						CpG_Shore_2kb_Downstream
chr22	39628227	-23.4079	0.0271803	CACNA1I
chr17	63450709	-23.3899	0.0272011							CpG_Shelf_2-4kb_Downstream
chr12	70920306	23.3892	0.027202	PTPRR
chr4	45871569	-23.3802	0.0272124
chr12	108589700	-23.3802	0.0272124							CpG_Shelf_2-4kb_Upstream
chr2	25230104	-23.3802	0.0272124	DNMT3A	exon		3'UTR
chr1	180254301	23.3741	0.0272196	LHX4
chr7	26627997	-23.3593	0.0272368
chr20	38864913	-23.3504	0.0272471	PPP1R16B
chr2	16166847	-23.2949	0.0273119
chr6	139483464	-23.2949	0.0273119	ENSG00000226571
chr9	88077148	23.2865	0.0273218					CpG: 74			promoter_-_strand	ENSG00000287750
chr5	31854456	-23.2731	0.0273375	PDZD2					CpG_Shore_2kb_Upstream
chr1	112723071	-23.2337	0.0273839	TAFA3	exon			CpG: 20
chr1	38740809	23.2236	0.0273957
chr13	113836057	-23.2229	0.0273966	GAS6					CpG_Shore_2kb_Downstream	CpG_Shelf_2-4kb_Downstream
chr19	898949	-23.2055	0.027417	R3HDM4					CpG_Shore_2kb_Upstream
chr11	64154575	23.1912	0.0274339	MACROD1
chr17	3980569	-23.1842	0.0274422	LINC01975
chr16	89709127	-23.1842	0.0274422	VPS9D1
chr1	203471130	-23.1842	0.0274422
chr10	103837052	-23.1816	0.0274453	SH3PXD2A
chr6	91336498	23.1669	0.0274627
chr22	17946189	23.1188	0.0275197	MICAL3
chr8	141059787	23.1038	0.0275376	ENSG00000253266
chr19	5267200	-23.0983	0.0275442	PTPRS
chr19	39247166	23.0893	0.0275548	IFNL4	exon			CpG: 137
chr19	45779312	-23.0825	0.0275629	DMPK	exon		3'UTR		CpG_Shore_2kb_Downstream
chr5	134110583	-23.0762	0.0275705							CpG_Shelf_2-4kb_Upstream
chr15	64824570	23.0675	0.0275808	PIF1					CpG_Shore_2kb_Downstream
chr22	50009616	23.0672	0.0275812	IL17REL					CpG_Shore_2kb_Upstream
chr22	47714185	-23.0617	0.0275877	ENSG00000224271
chr4	822782	-23.0437	0.0276093	CPLX1						CpG_Shelf_2-4kb_Upstream
chr2	46171711	-23.0347	0.0276201	PRKCE
chr7	155490455	-23.0246	0.0276321	CNPY1					CpG_Shore_2kb_Upstream
chr19	5125885	23.0235	0.0276335	KDM4B
chr17	76538662	23.0235	0.0276335						CpG_Shore_2kb_Downstream		promoter_-_strand	CYGB
chr10	133159637	23.0095	0.0276503						CpG_Shore_2kb_Upstream		promoter_+_strand	KNDC1
chr18	74450782	-22.9499	0.027722	DIPK1C
chr9	136587725	-22.9459	0.0277269
chr7	29566610	-22.9432	0.0277302	PRR15	exon			CpG: 42	CpG_Shore_2kb_Downstream	CpG_Shelf_2-4kb_Downstream
chr11	120062186	22.9336	0.0277417
chr15	73767843	22.9233	0.0277542								promoter_+_strand	INSYN1-AS1
chr5	172044285	-22.9016	0.0277804	STK10	exon		3'UTR
chr19	17240620	-22.8938	0.0277898	NR2F6						CpG_Shelf_2-4kb_Upstream
chr4	4763809	-22.8938	0.0277898
chr9	131495828	-22.8928	0.027791	PRRC2B	exon		3'UTR
chr11	64567563	-22.8868	0.0277983	SLC22A11					CpG_Shore_2kb_Upstream
chr16	85632104	-22.8868	0.0277983	GSE1					CpG_Shore_2kb_Upstream
chr10	103664053	-22.8868	0.0277983	SH3PXD2A						CpG_Shelf_2-4kb_Downstream
chr19	7415628	-22.8868	0.0277983	ARHGEF18
chr12	54498745	-22.8578	0.0278335	NCKAP1L
chr15	69991656	22.8562	0.0278355
chr19	50616597	-22.8511	0.0278418
chr7	157432668	-22.8199	0.0278798
chr5	74626192	22.8058	0.0278969
chr4	25951060	22.7924	0.0279134
chr14	54344660	-22.7905	0.0279156
chr19	7856924	-22.79	0.0279163	EVI5L
chr10	86970323	-22.7726	0.0279376	ADIRF	exon				CpG_Shore_2kb_Upstream		promoter_+_strand	ENSG00000271880
chr12	49637581	22.7462	0.0279699	PRPF40B	exon		3'UTR
chr16	26567582	-22.7391	0.0279786	ENSG00000286712
chr14	49860880	22.7007	0.028026						CpG_Shore_2kb_Upstream
chr3	197913053	-22.686	0.0280441	IQCG	exon
chr21	42389625	-22.6856	0.0280446	TMPRSS3
chr6	34151565	-22.6696	0.0280644							CpG_Shelf_2-4kb_Upstream
chr1	153773295	-22.664	0.0280713	INTS3	exon		3'UTR		CpG_Shore_2kb_Upstream
chr11	131573546	-22.664	0.0280713	ENSG00000285980	exon
chr12	131681809	22.6584	0.0280782
chr1	222288259	-22.6564	0.0280807	ENSG00000236230
chr2	216647814	-22.6373	0.0281043	IGFBP2
chr5	154737803	-22.6166	0.02813
chr12	6532208	-22.6066	0.0281425						CpG_Shore_2kb_Upstream
chr16	87820767	-22.5934	0.0281589
chr1	175888081	-22.571	0.0281868
chr1	16124022	-22.5655	0.0281937
chr19	17246963	-22.558	0.028203	ENSG00000269095					CpG_Shore_2kb_Downstream
chr16	84616578	-22.5393	0.0282264	COTL1					CpG_Shore_2kb_Upstream
chr1	1309596	-22.5314	0.0282362	PUSL1	exon	5'UTR		CpG: 298		CpG_Shelf_2-4kb_Upstream
chr6	38925495	-22.5305	0.0282374	DNAH8-AS1
chr19	5826606	22.5146	0.0282573	NRTN					CpG_Shore_2kb_Upstream	CpG_Shelf_2-4kb_Upstream
chr18	79611078	22.5146	0.0282573	ENSG00000267409	exon
chr2	28394562	22.5146	0.0282573	FOSL2	exon				CpG_Shore_2kb_Downstream
chr12	109725651	22.4767	0.0283049	FAM222A
chr15	90080013	-22.47	0.0283133	ZNF710	exon		3'UTR
chr20	59032926	-22.4605	0.0283253						CpG_Shore_2kb_Downstream		promoter_-_strand	ATP5F1E
chr5	139343879	-22.4322	0.0283609	PAIP2					CpG_Shore_2kb_Downstream
chr1	30805509	-22.4005	0.0284011						CpG_Shore_2kb_Upstream
chr17	49944655	22.3988	0.0284032
chr15	77630879	22.3733	0.0284355	LINGO1					CpG_Shore_2kb_Upstream	CpG_Shelf_2-4kb_Upstream
chr7	2382827	22.3733	0.0284355							CpG_Shelf_2-4kb_Downstream	promoter_+_strand	KIF19BP
chr22	37910963	-22.3451	0.0284713	MICALL1
chr16	54871217	-22.3431	0.028474	CRNDE
chr3	50493812	22.3129	0.0285124	CACNA2D2
chr11	69875168	22.3126	0.0285127
chr1	204196525	-22.3037	0.0285241								promoter_-_strand	KISS1
chr8	41310484	22.2882	0.0285439						CpG_Shore_2kb_Downstream
chr1	232445768	-22.2812	0.0285529	SIPA1L2	exon		3'UTR
chr21	41613177	-22.28	0.0285544
chr14	68814394	22.2621	0.0285773						CpG_Shore_2kb_Upstream
chr7	23597119	22.2574	0.0285834					CpG: 98			promoter_+_strand	CCDC126
chr15	88324207	-22.2227	0.028628
chr17	64777570	-22.2193	0.0286324	ARHGAP27P1-BPTFP1-KPNA2P3					CpG_Shore_2kb_Upstream
chr14	104148540	22.2184	0.0286335	KIF26A
chr22	38866685	-22.2182	0.0286338	CBX6	exon			CpG: 83
chr7	27241032	22.2035	0.0286527	ENSG00000253308					CpG_Shore_2kb_Upstream	CpG_Shelf_2-4kb_Upstream
chr7	137243896	-22.1767	0.0286873	PTN
chr1	31671439	-22.1582	0.0287112	COL16A1
chr6	109384182	-22.155	0.0287153						CpG_Shore_2kb_Downstream
chr2	241866967	22.1524	0.0287187						CpG_Shore_2kb_Downstream	CpG_Shelf_2-4kb_Downstream
chr12	120430673	22.1524	0.0287187
chr16	21359859	-22.1513	0.0287201
chr2	241188535	-22.1505	0.0287211	ANO7	exon	5'UTR
chr9	92947683	-22.1322	0.0287449	FGD3	exon	5'UTR
chr16	30183846	-22.1076	0.0287768	CORO1A	exon	5'UTR		CpG: 49
chr9	134295053	-22.0737	0.028821	LINC02247
chr7	2436967	-22.0403	0.0288645	CHST12	exon		3'UTR			CpG_Shelf_2-4kb_Downstream
chr3	49008224	-22.0144	0.0288984	WDR6	exon	5'UTR			CpG_Shore_2kb_Downstream
chr3	13513793	-22.0144	0.0288984
chr2	204863063	-21.9992	0.0289184	PARD3B
chr7	157289588	-21.9983	0.0289195
chr1	30824167	-21.9983	0.0289195						CpG_Shore_2kb_Upstream		promoter_+_strand	LINC01778
chr11	1228195	-21.9895	0.0289312	MUC5B					CpG_Shore_2kb_Downstream	CpG_Shelf_2-4kb_Upstream
chr15	73319100	-21.9694	0.0289576					CpG: 29
chr12	6926763	21.9375	0.0289996	ATN1					CpG_Shore_2kb_Upstream
chr9	130422152	21.9375	0.0289996	HMCN2
chr17	3755470	-21.9062	0.029041	ITGAE					CpG_Shore_2kb_Downstream
chr16	85524037	-21.9062	0.029041
chr17	21367245	-21.87	0.029089
chr22	49962846	21.8688	0.0290906	PIM3	exon			CpG: 398			promoter_+_strand	MIR6821
chr8	23523301	21.8619	0.0290998
chr16	87604269	-21.8599	0.0291024	JPH3	exon				CpG_Shore_2kb_Downstream
chr22	38316006	-21.8599	0.0291024	CSNK1E					CpG_Shore_2kb_Upstream
chr20	37897342	-21.8599	0.0291024
chr11	64340768	-21.8599	0.0291024	CCDC88B					CpG_Shore_2kb_Upstream		promoter_-_strand	ENSG00000236935
chr14	68816290	21.841	0.0291276						CpG_Shore_2kb_Upstream
chr7	69814539	-21.8385	0.029131	AUTS2
chr11	722063	21.8359	0.0291344	EPS8L2	exon				CpG_Shore_2kb_Downstream	CpG_Shelf_2-4kb_Upstream
chr3	195889456	21.7775	0.0292124	TNK2						CpG_Shelf_2-4kb_Downstream
chr15	40234181	-21.751	0.029248	ENSG00000260648	exon
chr17	18409736	21.7446	0.0292566						CpG_Shore_2kb_Upstream
chr4	87408350	-21.7351	0.0292693
chr14	103104397	21.7342	0.0292705	EXOC3L4	exon			CpG: 254
chr1	38029808	21.7055	0.0293092
chr14	105528443	-21.7038	0.0293115	TMEM121				CpG: 354
chr6	85188100	-21.7038	0.0293115
chr15	63566048	-21.7038	0.0293115	USP3
chr11	1993711	-21.6874	0.0293336						CpG_Shore_2kb_Downstream	CpG_Shelf_2-4kb_Upstream
chr5	177477139	21.6809	0.0293424	ENSG00000279821	exon					CpG_Shelf_2-4kb_Downstream
chr19	7934276	-21.6528	0.0293804	TIMM44				CpG: 43	CpG_Shore_2kb_Downstream
chr17	39730067	21.6478	0.0293872	MIEN1	exon				CpG_Shore_2kb_Upstream
chr20	61659784	-21.6461	0.0293895	CDH4
chr22	39123267	21.6343	0.0294055
chr11	45494089	21.6343	0.0294055	ENSG00000254746
chr2	104755720	21.6306	0.0294105	LINC01114	exon
chr9	136117774	-21.6237	0.0294198	TMEM250					CpG_Shore_2kb_Upstream
chr11	68123118	21.5773	0.029483	CHKA-DT					CpG_Shore_2kb_Downstream
chr7	2432799	-21.5662	0.0294982	CHST12	exon			CpG: 130
chr19	19732042	21.5636	0.0295017	ZNF14					CpG_Shore_2kb_Upstream
chr2	66508483	21.4963	0.029594	MEIS1
chr20	24280502	21.4575	0.0296475
chr6	106512949	-21.4153	0.0297058	CRYBG1	exon			CpG: 119		CpG_Shelf_2-4kb_Downstream
chr4	70019641	-21.4153	0.0297058
chr21	40846418	-21.4146	0.0297067	DSCAM					CpG_Shore_2kb_Upstream
chr19	55141985	21.4093	0.0297141	TNNT1	exon
chr19	18672100	-21.3714	0.0297667							CpG_Shelf_2-4kb_Downstream
chr11	66289773	-21.3714	0.0297667					CpG: 98	CpG_Shore_2kb_Upstream		promoter_-_strand	YIF1A
chr6	168133105	-21.3714	0.0297667							CpG_Shelf_2-4kb_Downstream
chr11	61581629	-21.3714	0.0297667						CpG_Shore_2kb_Downstream		promoter_-_strand	SYT7
chr16	11306743	-21.3491	0.0297978								promoter_-_strand	MIR548H2
chr4	7426879	-21.3369	0.0298148	SORCS2
chr20	63258681	-21.3369	0.0298148	FLJ16779	exon					CpG_Shelf_2-4kb_Downstream
chr2	240641095	-21.3354	0.0298168						CpG_Shore_2kb_Upstream
chr5	2670048	21.3332	0.0298199
chr15	82043577	21.297	0.0298706	MEX3B	exon		3'UTR	CpG: 383
chr14	105476206	21.2328	0.0299608	CRIP2	exon				CpG_Shore_2kb_Upstream
[truncated: 1,246 more rows]

## Sheet: Supplementary Table 7
Supplementary Table 7. Nominally significant differential 5hmC sites between patients with bipolar disorder and their unaffected siblings within GWAS-identified BD risk genes.
BD Risk Gene	Chrmosome	Position (bp)*	Genomic Feature**	Log2 FC	P-value
ERBB2	17	39719520	Intron	-0.88	1.6 × 10-03		*Reference assembly hg38.
GRIN2A	16	9755752	Exon; dELS	0.86	2.7 × 10-03		**Annotations using UCSC Genome Browser (GRCh38.p13). Promoter-like signature (PLS), proximal enhancer-like signature (pELS), and distal enhancer-like signature (dELS) are based on ENCODE Registry of Candidate cis-Regulatory Elements (cCREs). Additionally, Transcription Factor Binding Sites (TFBS) based on regulatory regions curated by Open Regulatory Annotation (ORegAnno), with the target gene p…
BCL11B	14	99202788	Intron	-1.24	3.7 × 10-03
PLEC	8	143946637	Intron; CpG Shore; pELS; TFBS (PLEC)	-0.79	1.1 × 10-02
SHANK2	11	70742593	Intron	0.27	1.6 × 10-02
PACS1	11	66232812	Intron; dELS	0.29	1.8 × 10-02
OSBPL2	20	62254476	Intron; dELS	-0.48	2.1 × 10-02
PLXNA4	7	132520403	Intron	0.32	3.5 × 10-02
RTN4RL1	17	1952751	Intron	0.37	3.8 × 10-02
TRANK1	3	36924727	Intron; dELS; TFBS (TRANK1)	0.37	4.3 × 10-02
CACNA1C	12	2343833	Intron; TFBS (CACNA1C)	-0.72	5.0 × 10-02

## Sheet: Supplementary Table 8
Supplementary Table 8. Top-10 enriched functional annotations for 5hmC sites differentiated between BD case and sib pairs for NSC cell lines showing genes associated with functional annotations.
Category	Term	Count	%	PValue	Genes	List Total	Pop Hits	Pop Total	Fold Enrichment	Bonferroni	FDR
GOTERM (CC)	GO:0031012~extracellular matrix	49	3.09735	1.56563e-11	COL18A1, SPON2, SPON1, COL16A1, COL14A1, LAMC3, NCAN, FGF1, ELFN2, ELFN1, COMP, ADAMTS4, ADAMTS2, ADAMTS3, ADAMTSL5, ADAMTSL4, ADAMTSL2, HMCN2, COL27A1, VWF, COL23A1, ADAMTS20, CRISPLD2, RTN4RL1, MMP15, PXDN, COL6A6, EMID1, COL13A1, LTBP2, ADAMTS14, WNT11, MUC2, GPC1, ADAMTS17, FLRT1, LRIG1, MUC4, WNT3, LINGO1, RARRES2, SSPOP, MUC5B, COLQ, COL1A1, COL5A1, ALPL, COL9A3, FBN1	1299	259	20472	2.98159	1.1022e-08	1.04427e-08
GOTERM (CC)	GO:0005886~plasma membrane	400	25.2845	2.51764e-07	SERPINE1, RXFP4, ENO2, FGFRL1, PREX1, DPYSL2, MS4A15, ANKS1B, PRKCG, UNC13A, UNC5A, PRKCB, PRKCE, COL23A1, PRKCD, CACNA2D2, PRKCA, HSPG2, GABRG3, SYTL3, GPR162, CLDN5, BIN1, FEZ1, PARD3, SKAP1, TTYH3, COL13A1, TTYH2, TTYH1, NEDD4L, TAPBPL, PRKCZ, UGT8, CRACR2A, GRIN2A, PPP4C, FLRT1, NPBWR2, NCKAP1L, PIP5K1C, SLC19A1, JAG2, JUP, DMPK, ABCA7, GRIN2C, SLC6A6, ABTB1, PPP5C, GRIN3B, FXYD3, CDK14, KCNC…	1299	5066	20472	1.24436	0.000177227	5.45962e-05
GOTERM (CC)	GO:0070161~anchoring junction	62	3.91909	1.78727e-07	PTPRS, DAGLA, KCNC1, DENND1A, ATN1, GRIK3, GRIK4, STON2, SH3PXD2A, FRRS1L, GPER1, NCS1, KDR, DLGAP3, DLGAP2, LZTS1, SH3GL1, ANKS1B, UNC13A, DSCAM, GRID1, KCNAB2, ANO7, GABRG3, SORCS2, SLC9B2, OLFM1, DOK7, DSCAML1, SHANK2, SHANK1, BRSK1, TAMALIN, CTBP2, CACNA1C, CPLX2, ADCY8, CPLX1, TMEM240, ABR, ZNRF1, SYNGR1, GRIN2A, PALMD, OTOF, FARP1, GABBR2, PTPRN2, SYT2, SEMA4C, ATP2B2, GRIN2C, COLQ, SYT7, S…	1299	481	20472	2.03141	0.000125816	5.45962e-05
GOTERM (CC)	GO:0005604~basement membrane	22	1.39064	3.27414e-07	LAMA5, COL18A1, CD151, LAMC3, ATRNL1, ERBIN, LAMB1, PTN, THBS2, HSPG2, NTN1, COLQ, LOXL1, NTN3, SMOC2, COL5A1, PXDN, VWA1, COL9A3, AGRN, FREM1, FBN1	1299	94	20472	3.68847	0.000230473	5.45962e-05
GOTERM (CC)	GO:0015629~actin cytoskeleton	38	2.40202	2.7585e-06	NOTCH3, AHNAK, FAM107A, LSP1, ADCY8, NTN1, CORO1A, ACTB, ABLIM1, SAMD14, MPRIP, ABL1, TNKS1BP1, WASF2, CORIN, CARMIL2, GSN, DMTN, AUTS2, JUP, MYO7B, AFAP1, SORBS2, NEB, MYO9B, SEPTIN9, CORO2B, SPTB, MTSS1, AIF1L, MTSS2, ANLN, USH1G, BIN1, CDC42EP4, FILIP1, BCAR1, MSRB1	1299	258	20472	2.32121	0.0019401	0.000306654
GOTERM (CC)	GO:0044305~calyx of Held	10	0.632111	2.35943e-06	PRKCG, KCNC1, PRKCB, NCS1, CPLX2, KCNK2, TSPOAP1, CPLX1, GIT1, ACTB	1299	21	20472	7.50467	0.00165966	0.000306654
GOTERM (CC)	GO:0005856~cytoskeleton	62	3.91909	8.97701e-06	FHOD3, HIP1, FRMPD2, LMOD1, PTPN21, HSPB1, LDB3, CFAP300, CLU, ACTB, OSBPL10, DPYSL2, TNKS1BP1, LRRFIP1, PLEKHG3, STPG3, TPM4, ACTN2, MYO7B, ARHGEF18, KAZN, TYK2, KCNAB2, ANK1, FRMD1, ENAH, ITPKB, FRMD6, BIN1, CDC42EP4, PARD3, PFN1, PPP1R12C, LLGL1, KANK3, PLEC, TAGLN, PXN, TWF2, CORO1A, CNN2, FGD3, FAM83H, CRACR2A, SYMPK, IGF2BP2, WASF2, MAP2K6, FARP2, FARP1, JUP, AUTS2, NOS3, LIMK1, SPAG4, DCLK…	1299	541	20472	1.80612	0.00629992	0.00076806
GOTERM (MF)	GO:0005085~guanyl-nucleotide exchange factor activity	38	2.40202	1.00053e-06	DENND1C, BCAR3, DOCK6, TRIO, DENND1A, RASGRF1, KNDC1, DENND3, ARHGEF10L, RAPGEFL1, CYTH3, FGD3, ABR, PREX1, CYTH4, RASGEF1C, MCF2L, PLEKHG4B, SH3BP5, EPS8L2, SBF2, RALGPS1, PLEKHG3, FARP2, ARHGEF10, FARP1, VPS9D1, ARHGEF17, DENND2B, PLEKHG6, ARHGEF16, ARHGEF18, VAV2, TIAM2, RAPGEF1, RIN3, RIN2, RAPGEF3	1266	234	18811	2.41294	0.00123889	0.00122365
GOTERM (MF)	GO:0005201~extracellular matrix structural constituent	26	1.64349	4.91336e-06	LAMA5, COL18A1, SPON1, COL16A1, COL13A1, COL14A1, LTBP2, THBS2, COMP, HMCN2, IGFBP7, COL27A1, VWF, COL23A1, LAMB1, PCOLCE, MUC5B, COLQ, COL1A1, COL5A1, PXDN, VWA1, COL9A3, MFGE8, AGRN, FBN1	1266	138	18811	2.79945	0.00606917	0.00300452
GOTERM (MF)	GO:0005096~GTPase activator activity	41	2.59166	7.78412e-06	AGAP1, ASAP1, ARHGEF10L, AGAP3, SIPA1L2, SIPA1L3, RAP1GAP, ABR, PREX1, RGS3, WNT11, CHN2, TBC1D10C, NCKAP1L, SRGAP3, EVI5L, RGS8, TBC1D22A, TBC1D22B, GIT1, TBC1D16, RGS7, RAP1GAP2, VPS9D1, RANBP3, PLEKHG6, MYO9B, ADAP1, MTSS2, ARHGAP33, TIAM2, ARHGAP10, ACAP3, RASA3, SGSM2, RGS10, RIN3, RIN2, LLGL1, SIPA1, LLGL2	1266	285	18811	2.13755	0.0095982	0.00317333
